# Supplementary material
Source: PubMed Central journal article supplement (PMC4129447)

# **Comparison of Backbone Modification in Protein $\beta$ -Sheets by $\alpha \rightarrow \gamma$ Residue Replacement and $\alpha$ -Residue Methylation**

George A. Lengyel, Zachary E. Reinert, Bryan D. Griffith, and W. Seth Horne\*

*Department of Chemistry, University of Pittsburgh, Pittsburgh, PA 15260*

**SUPPORTING INFORMATION**

**PEPTIDE AND MONOMER NMR SPECTRA**

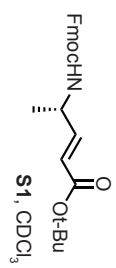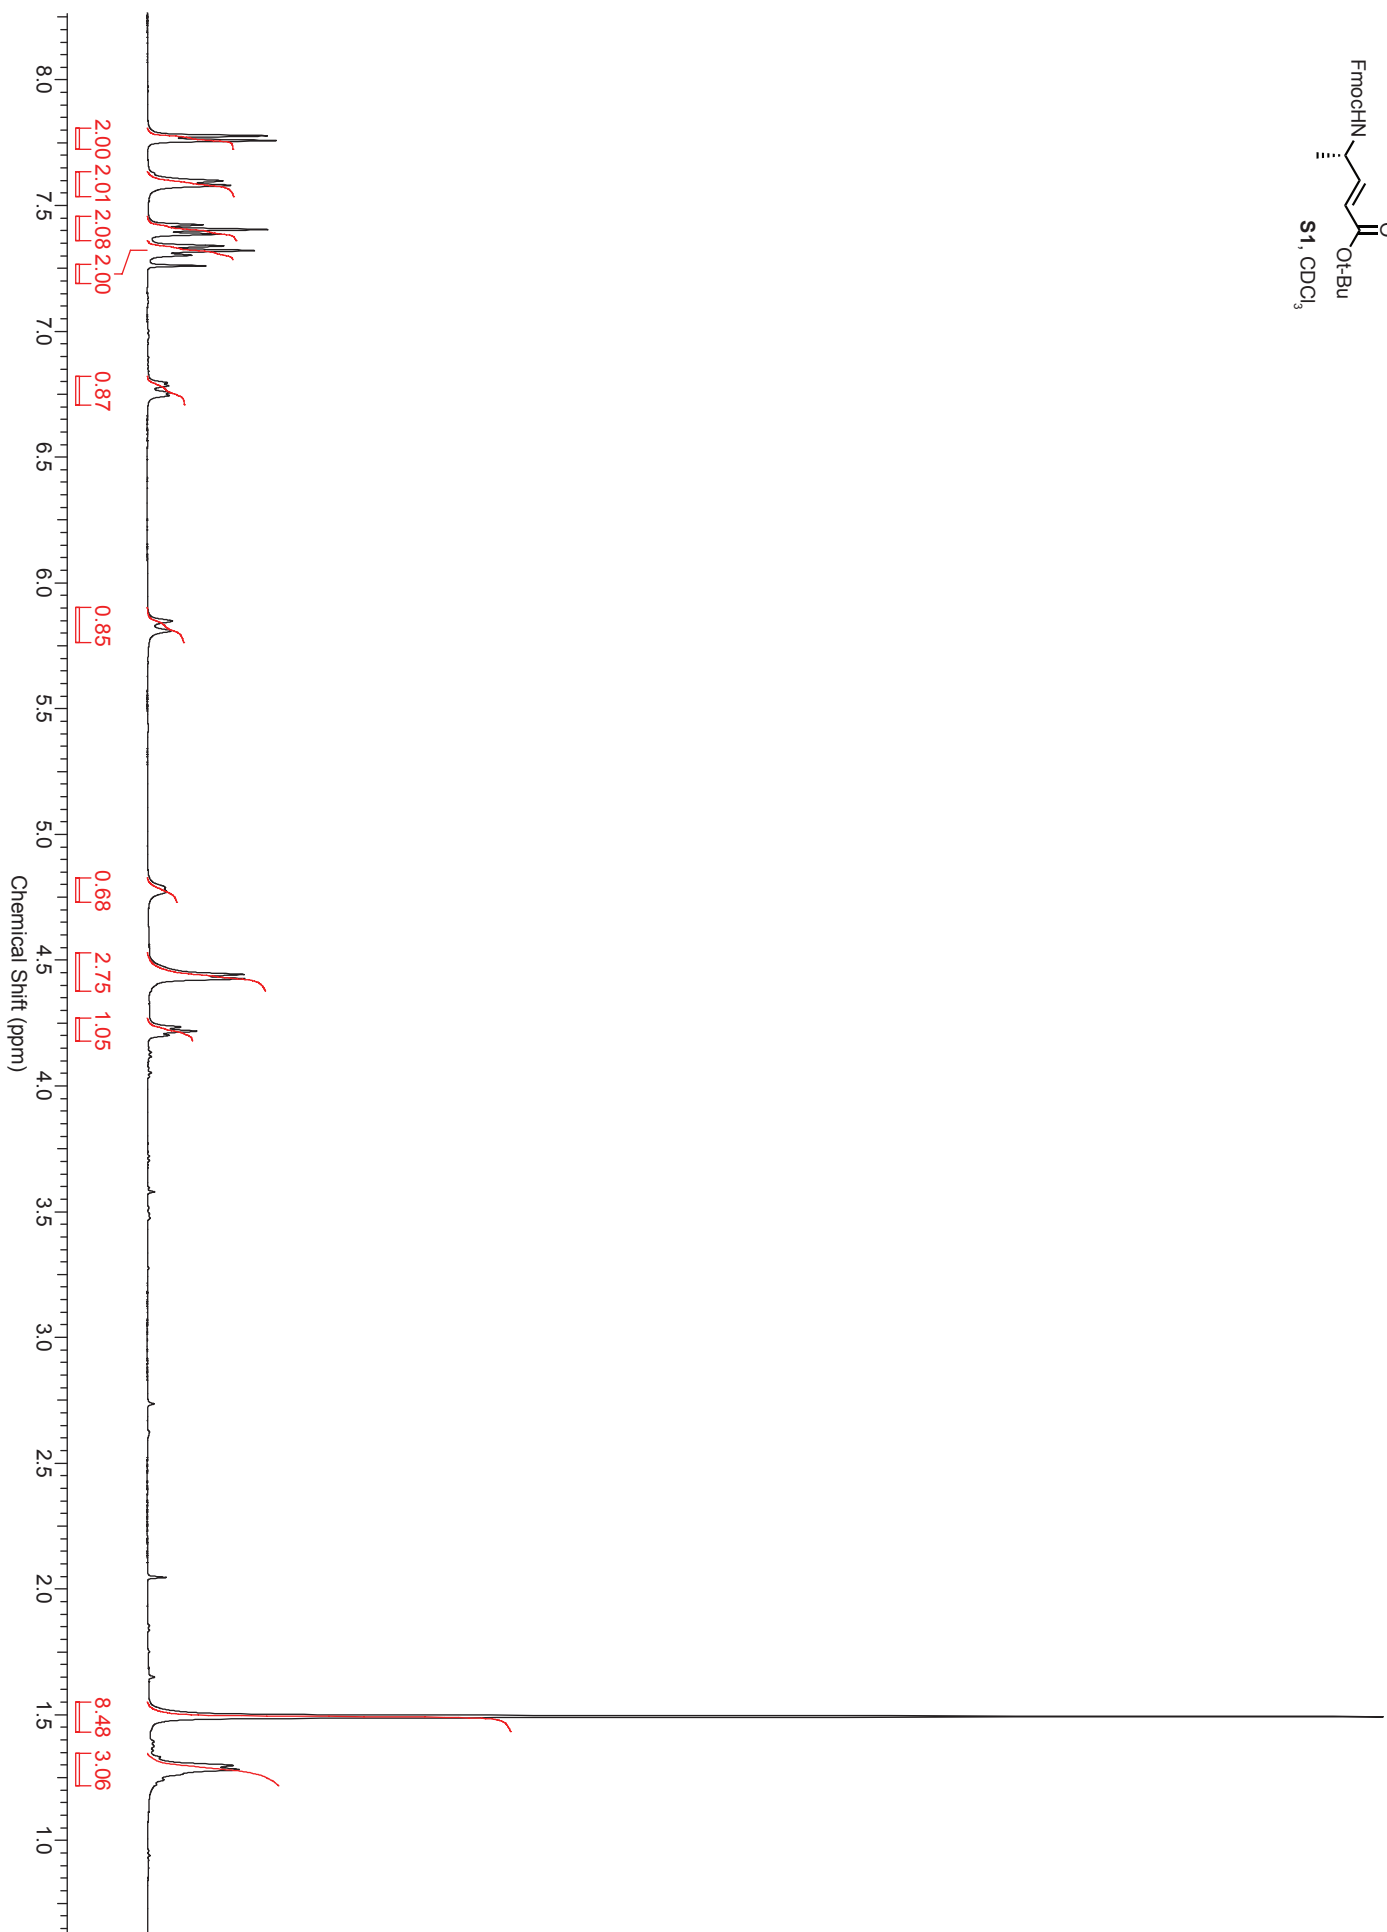

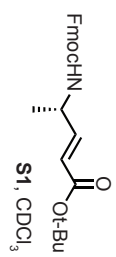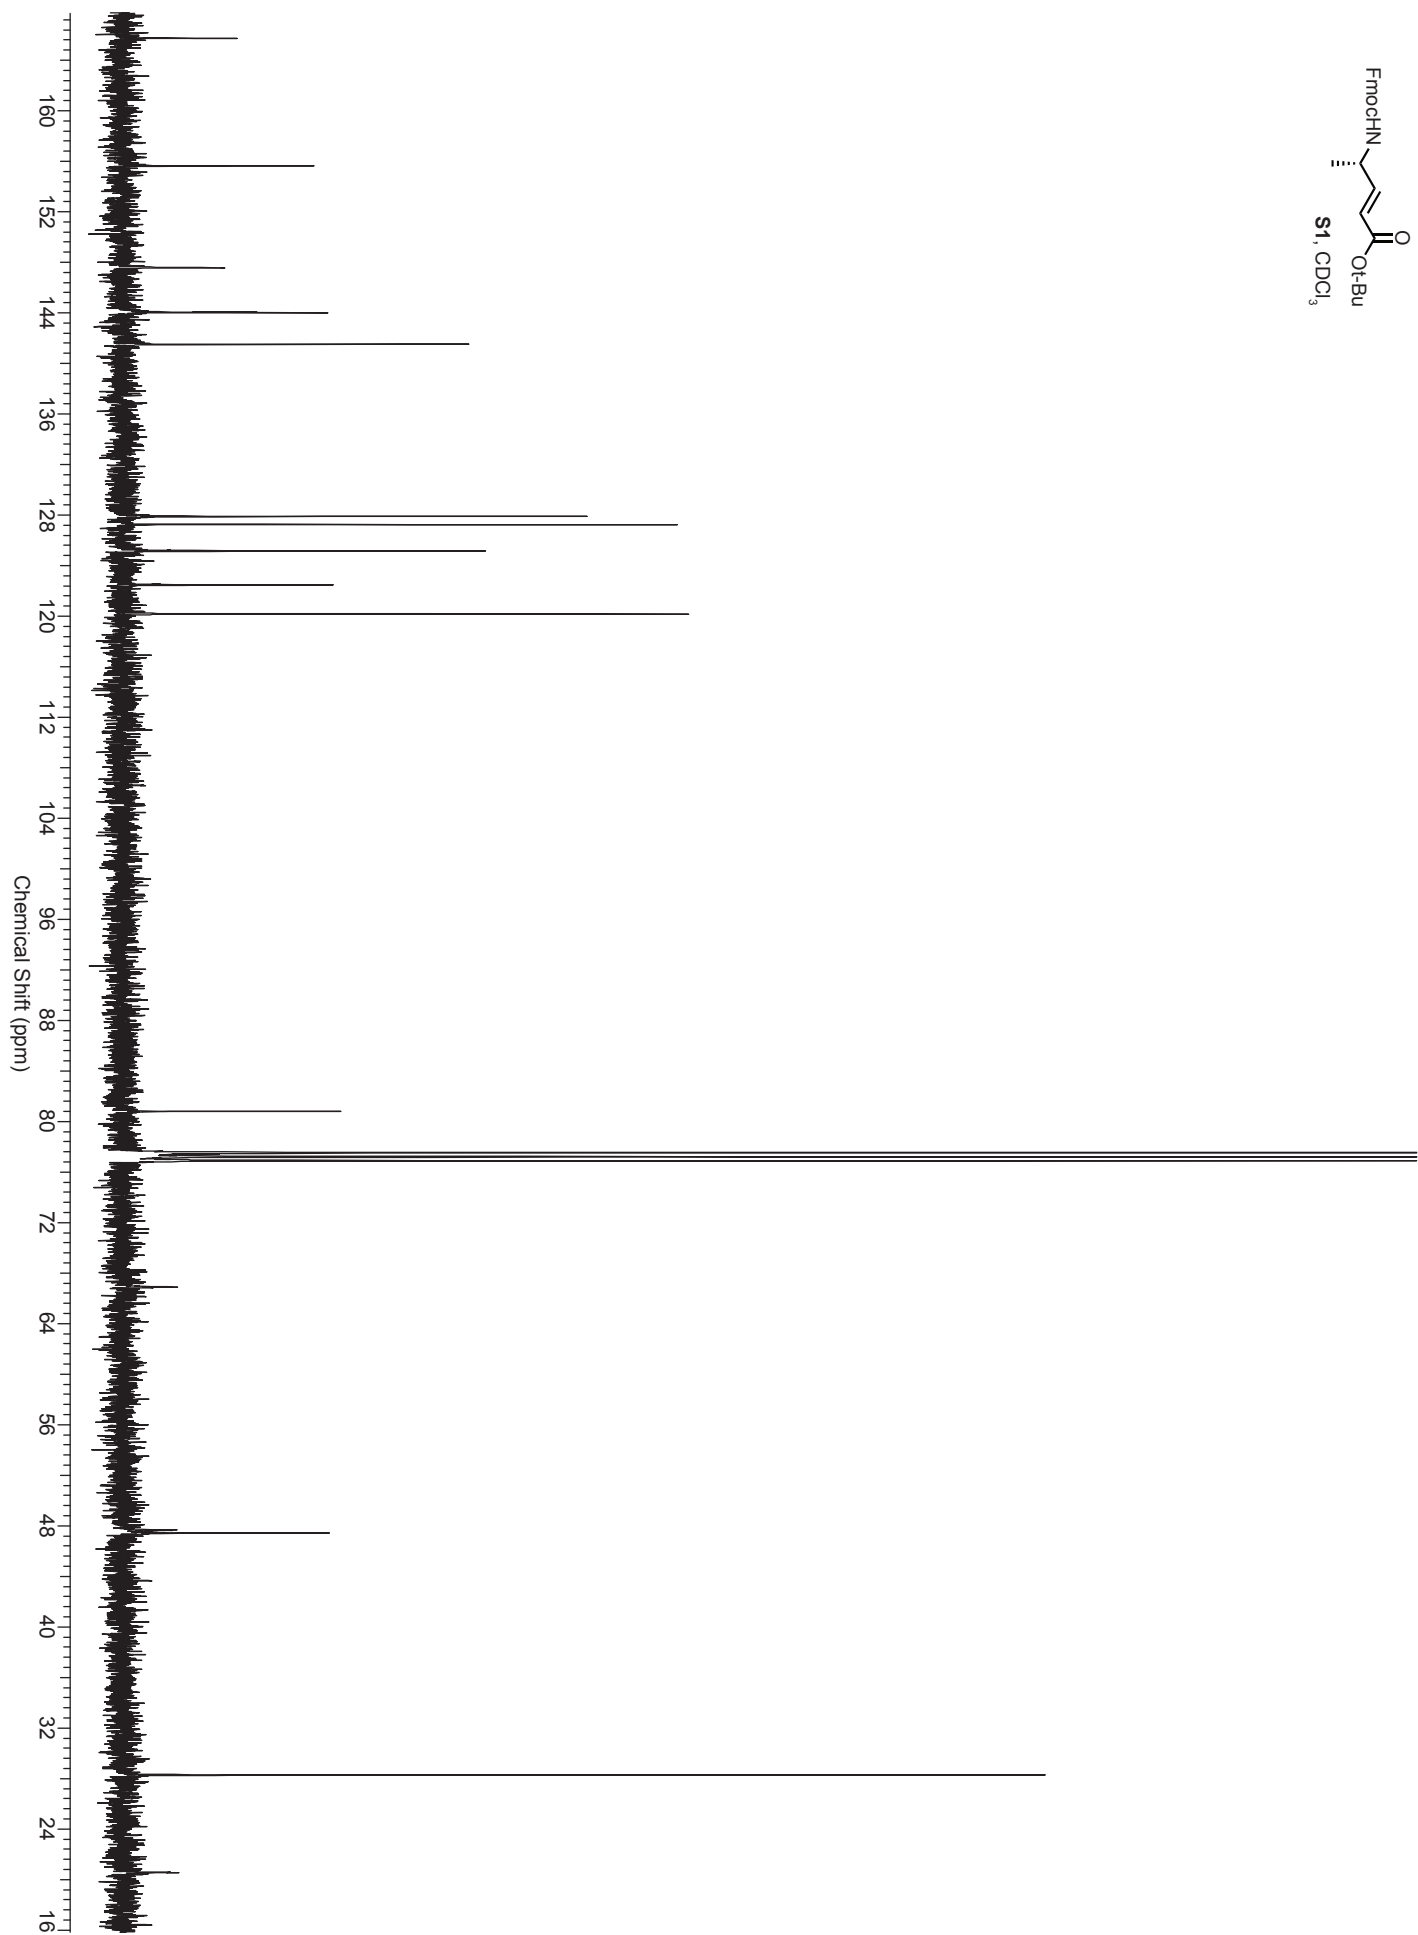

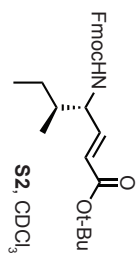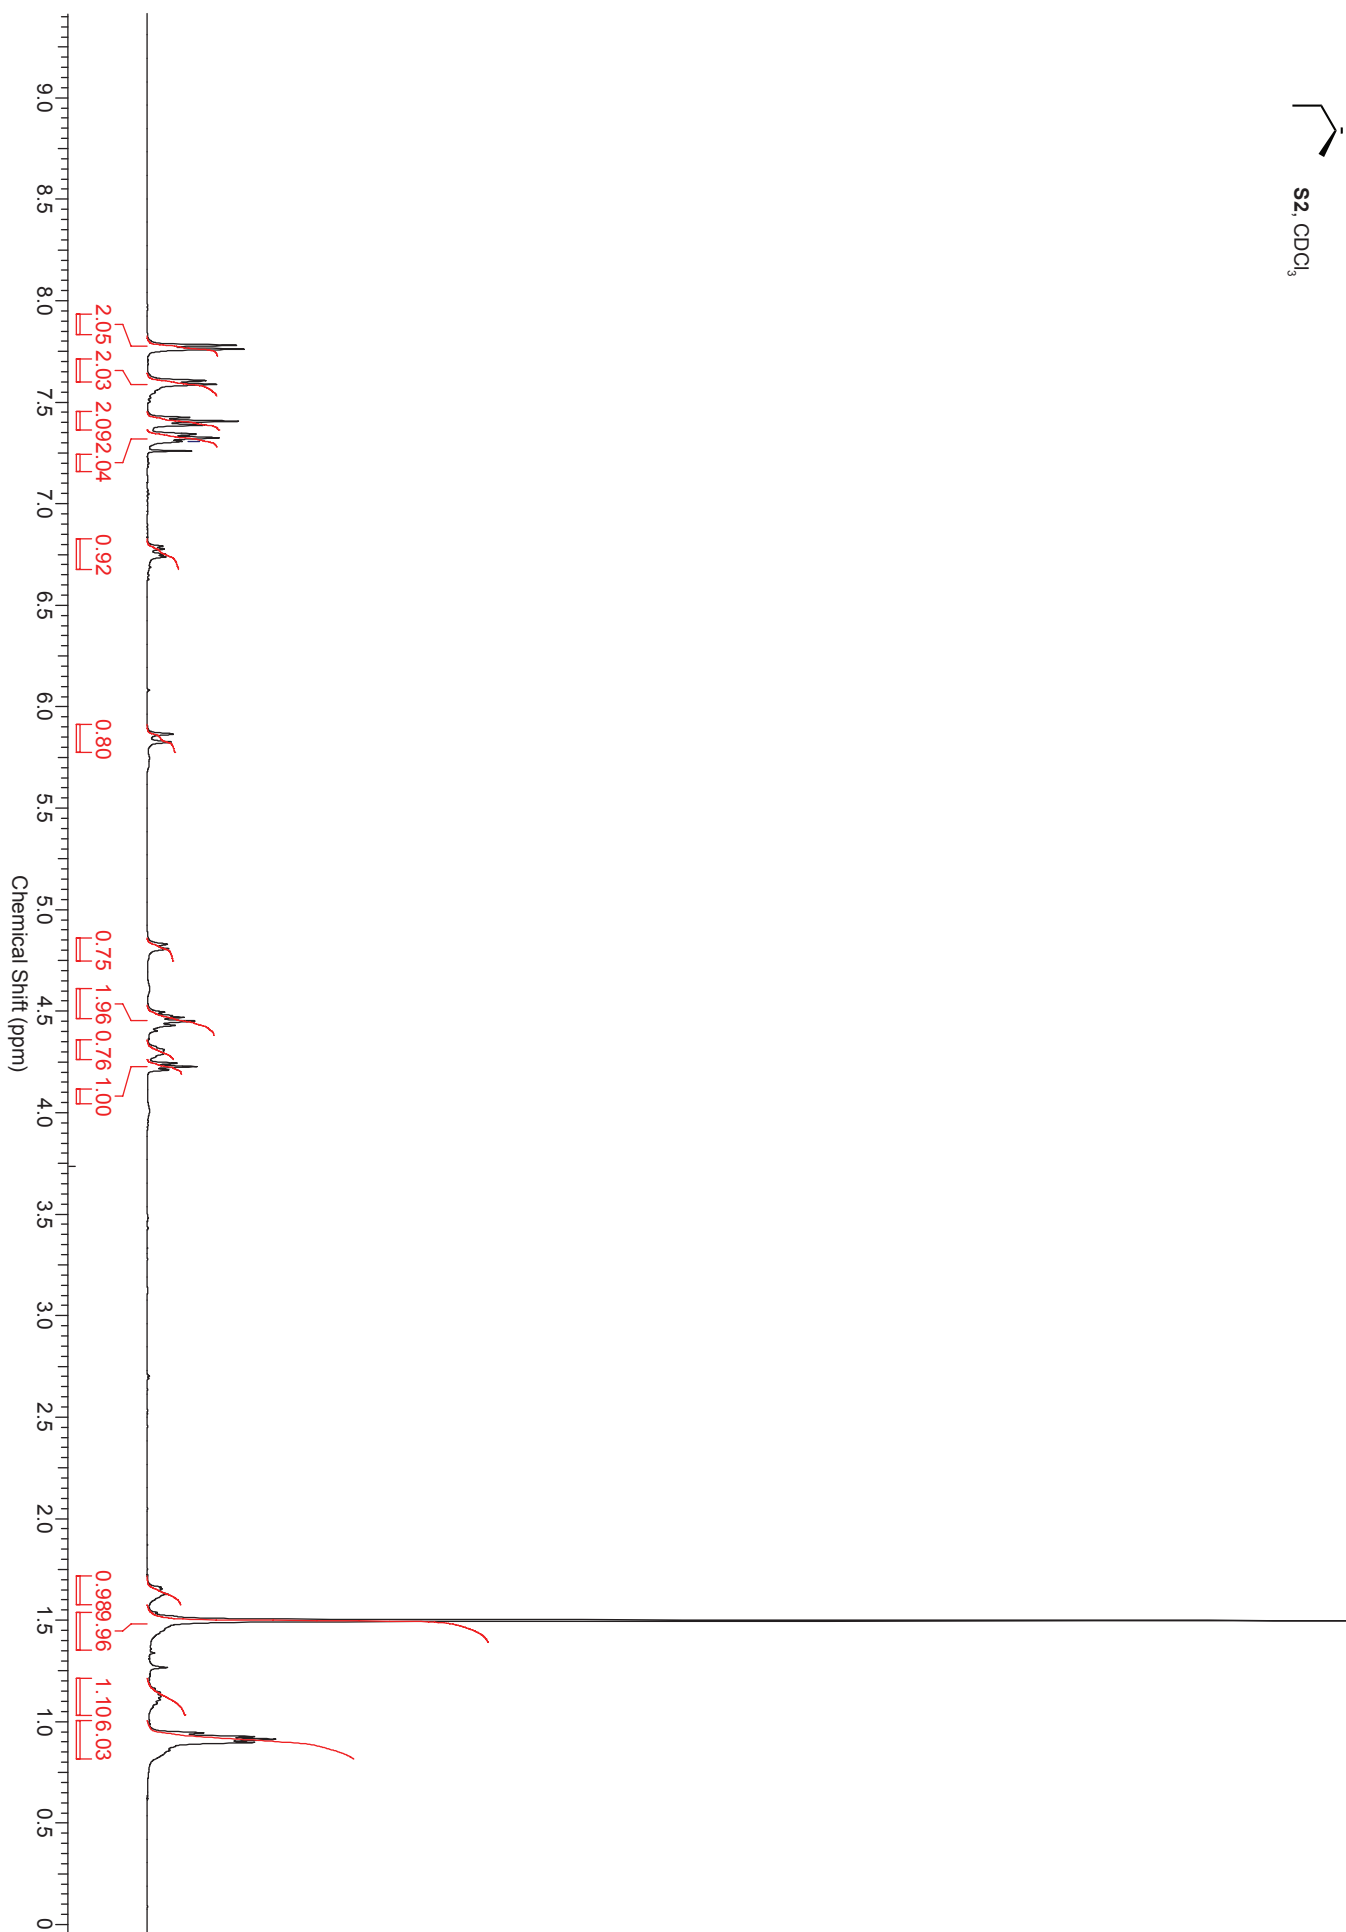

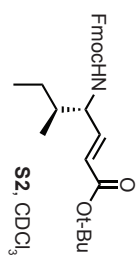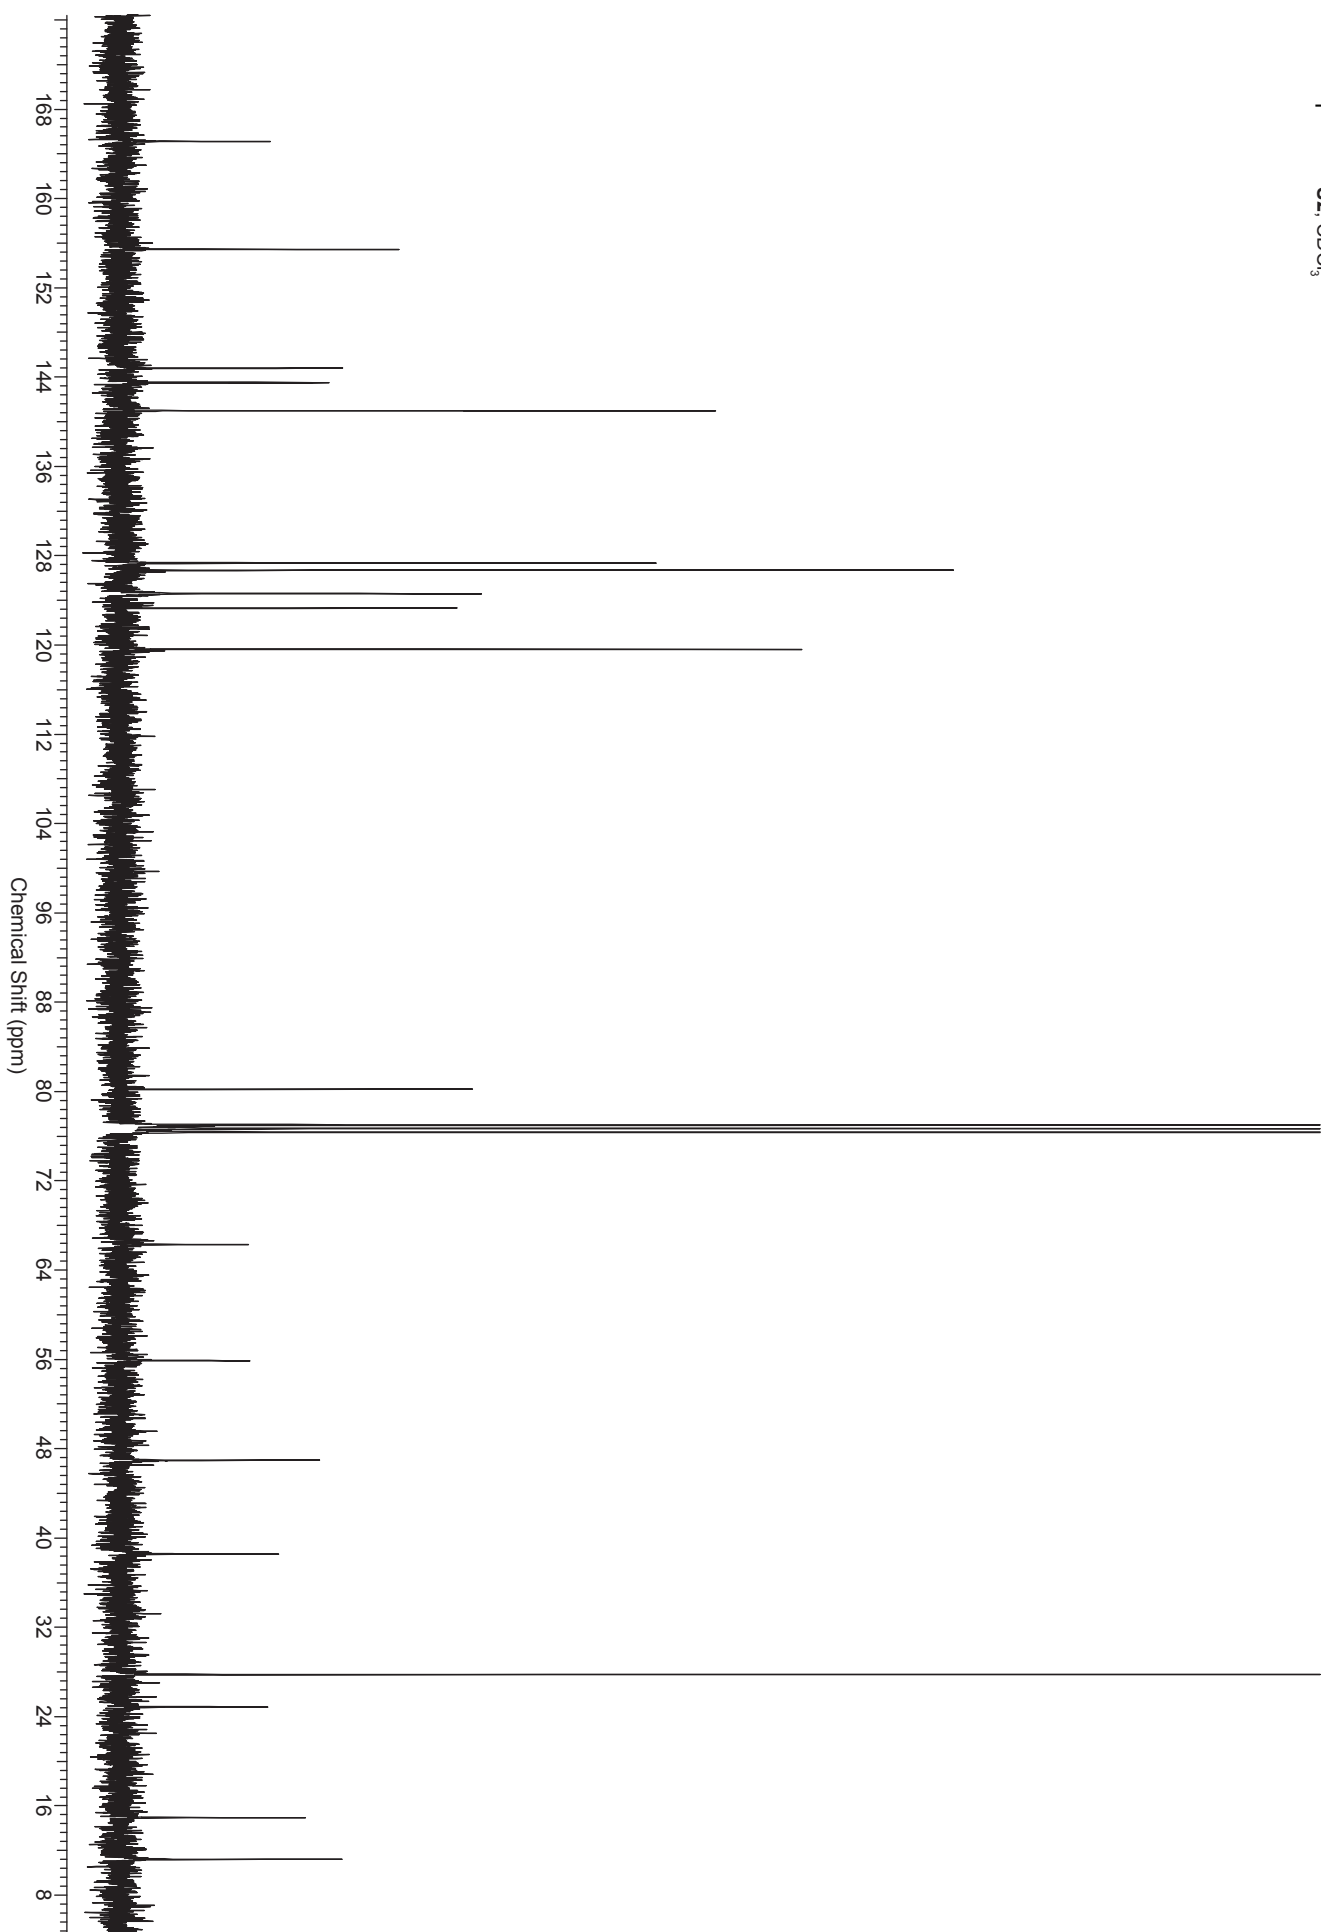

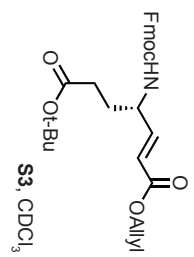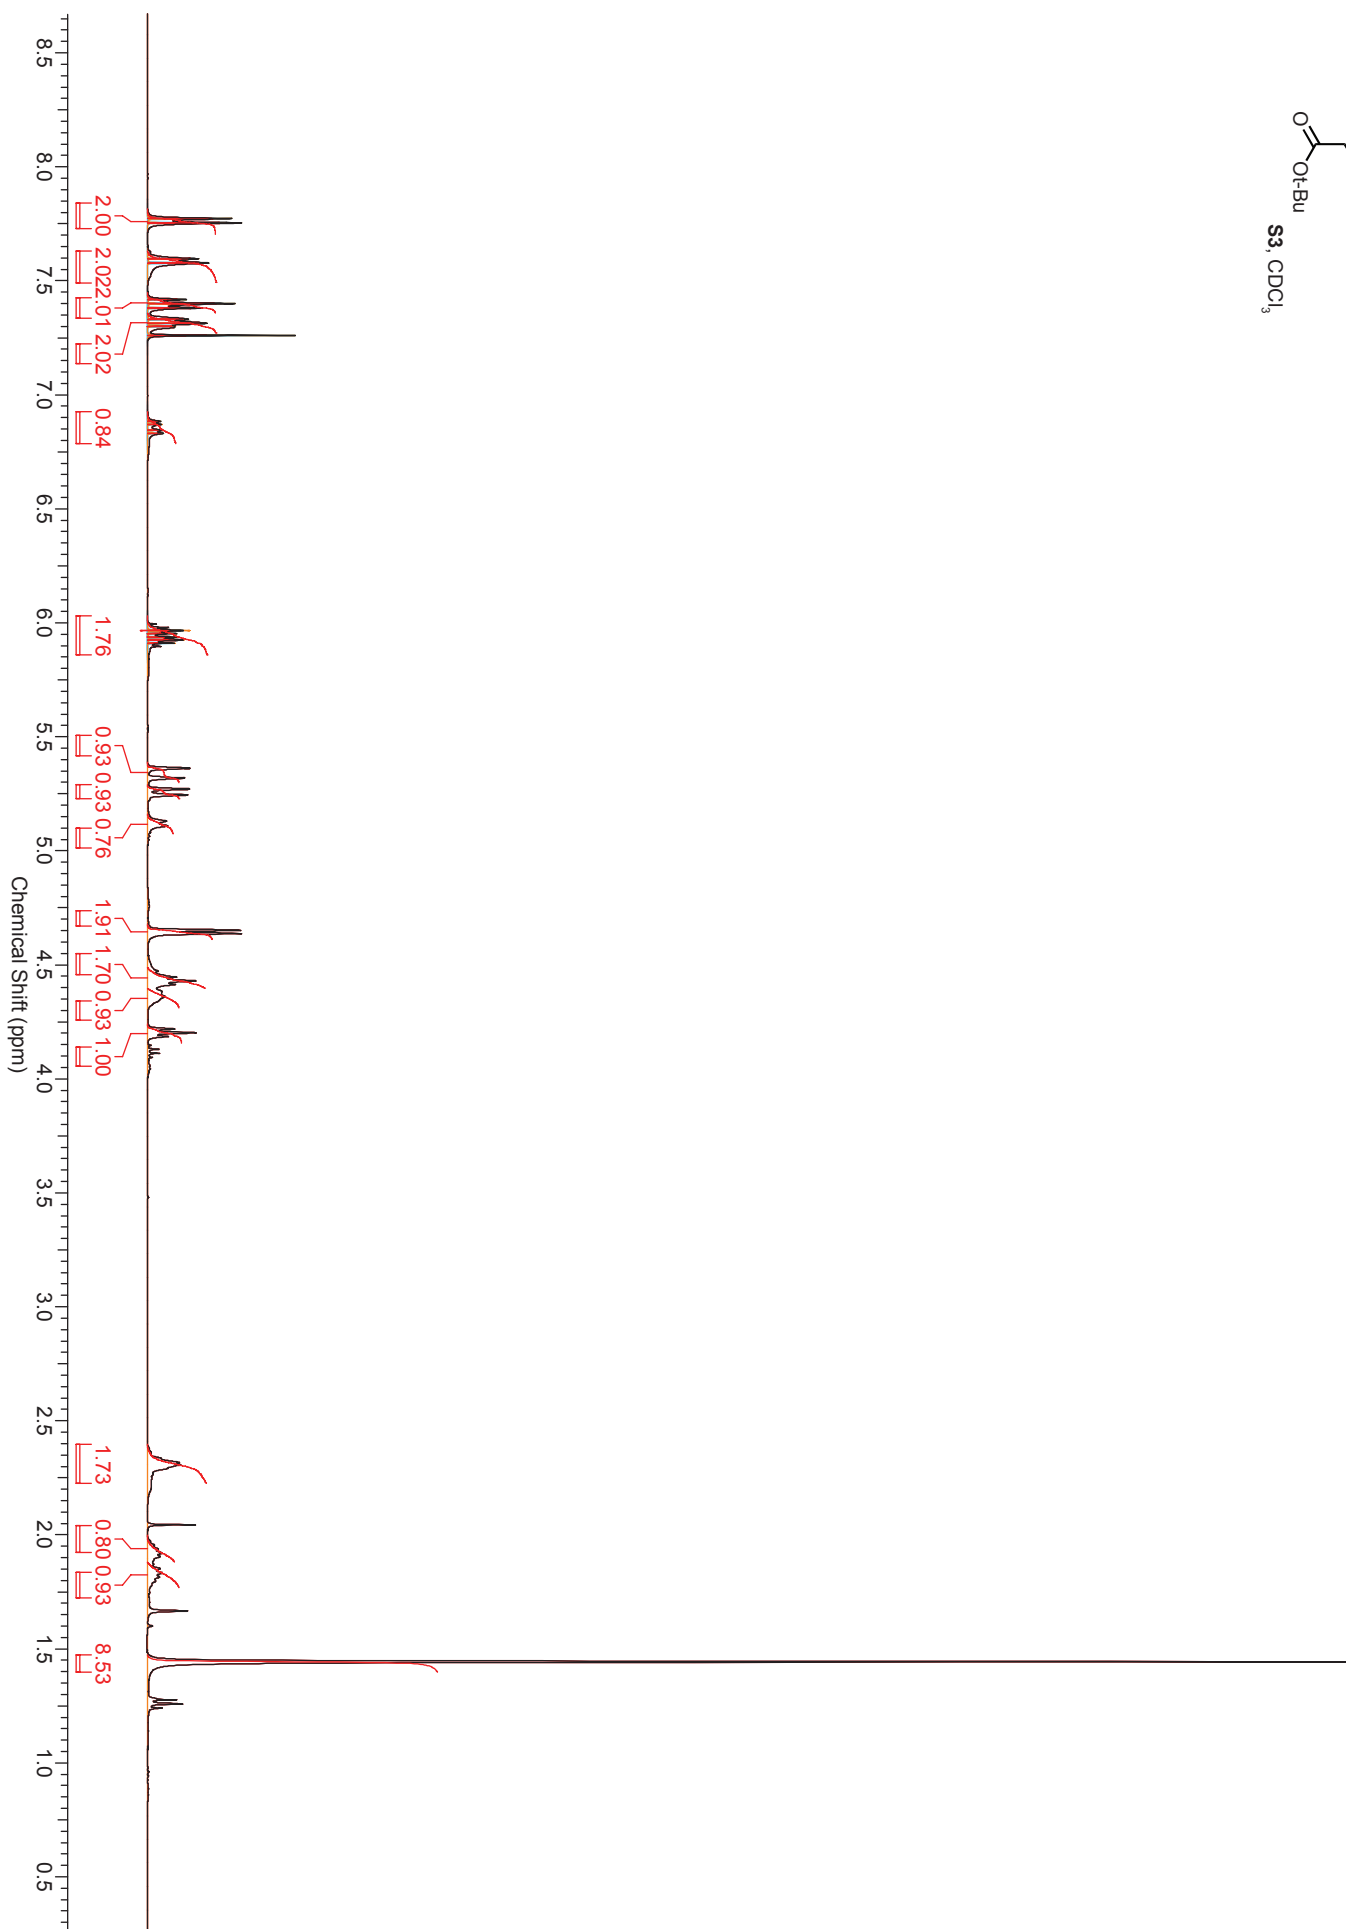

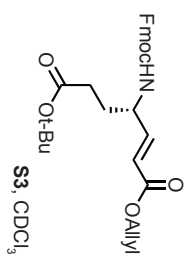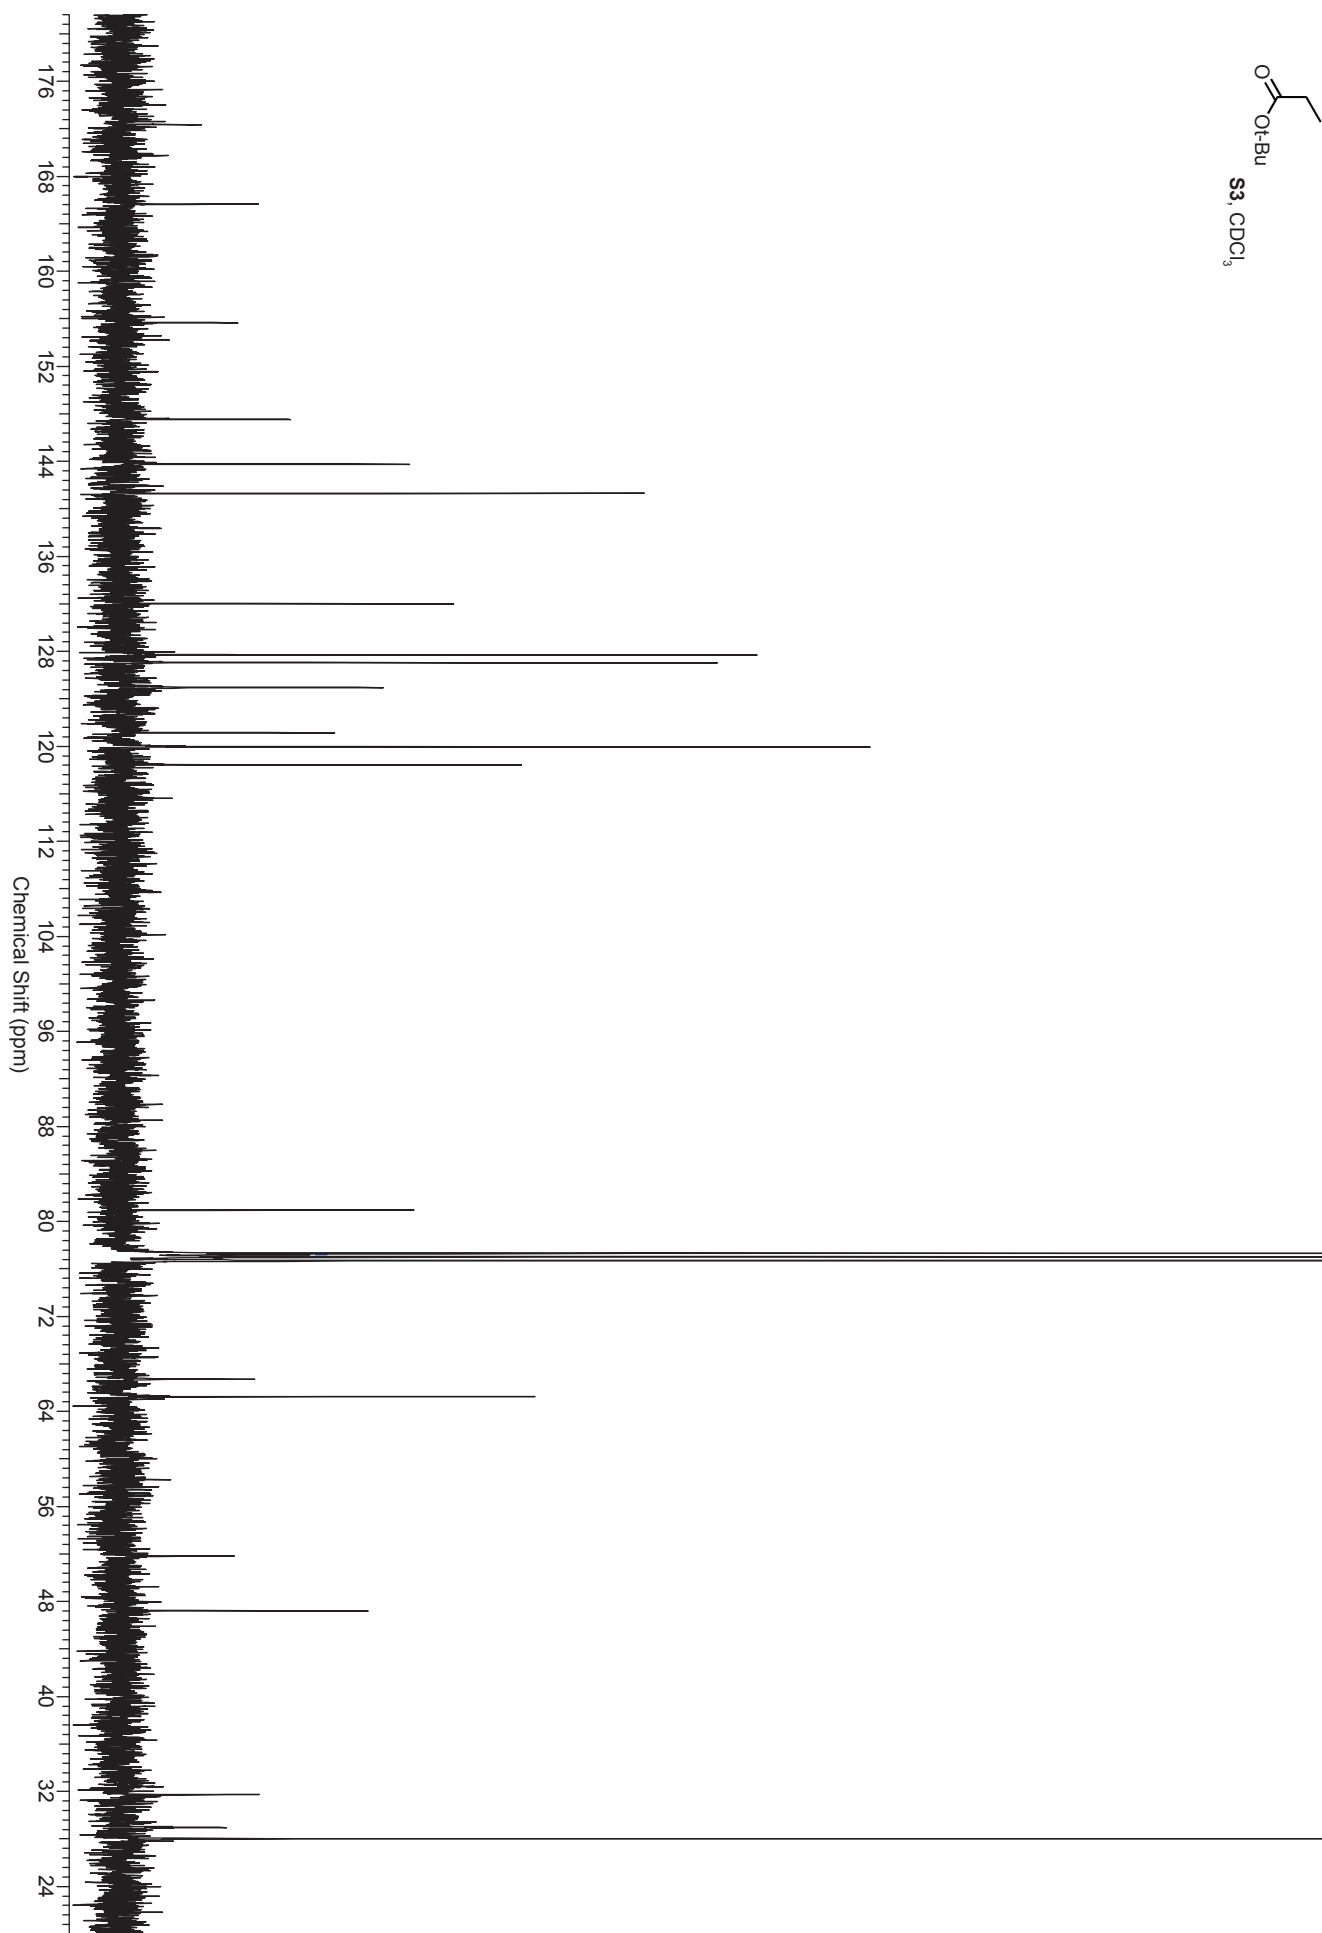

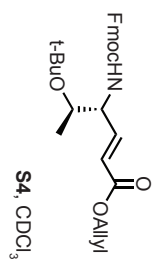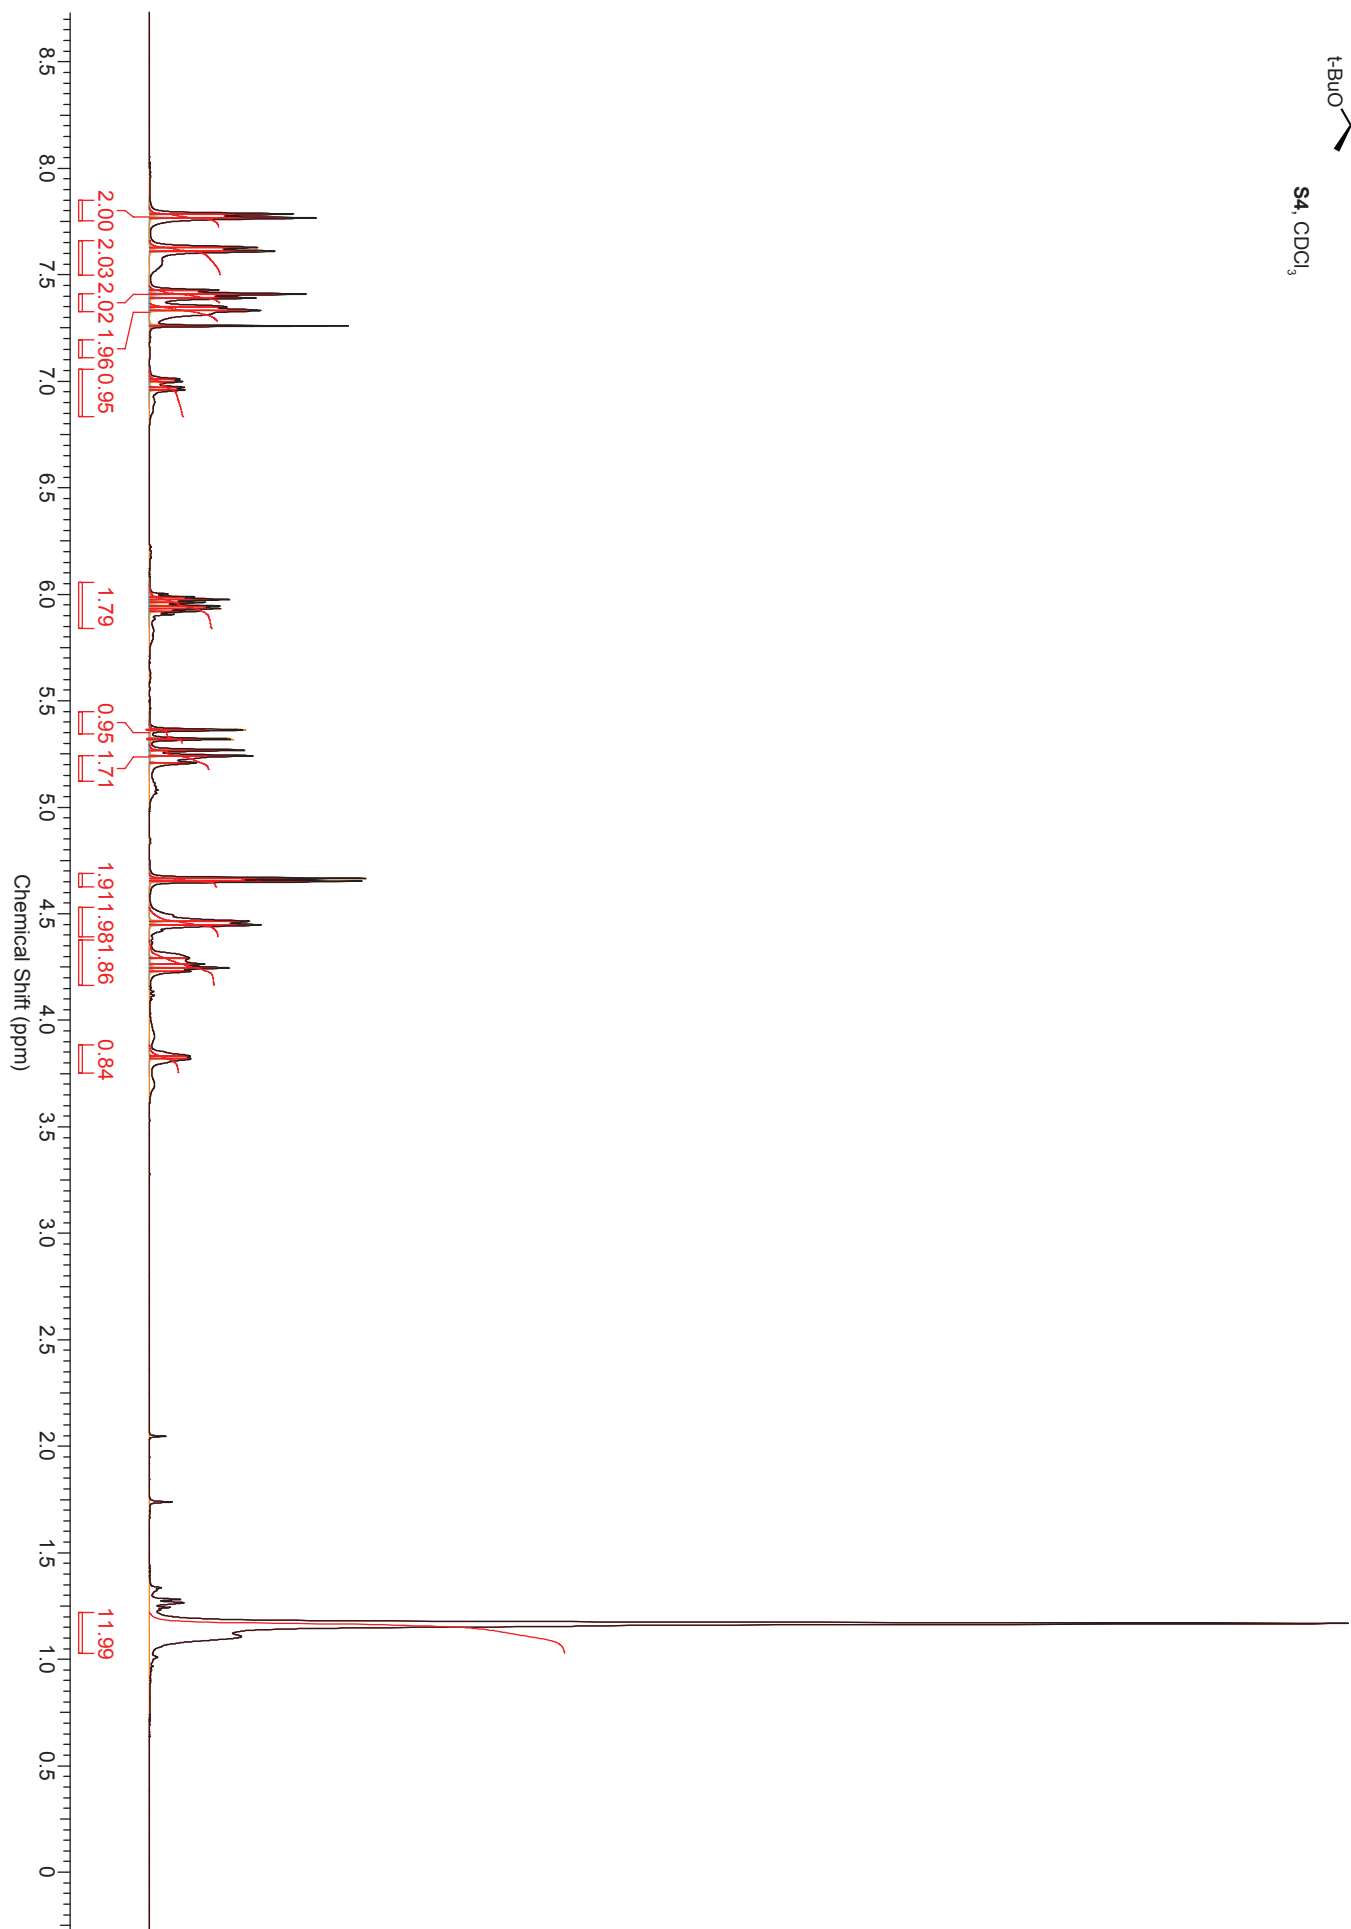



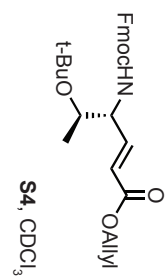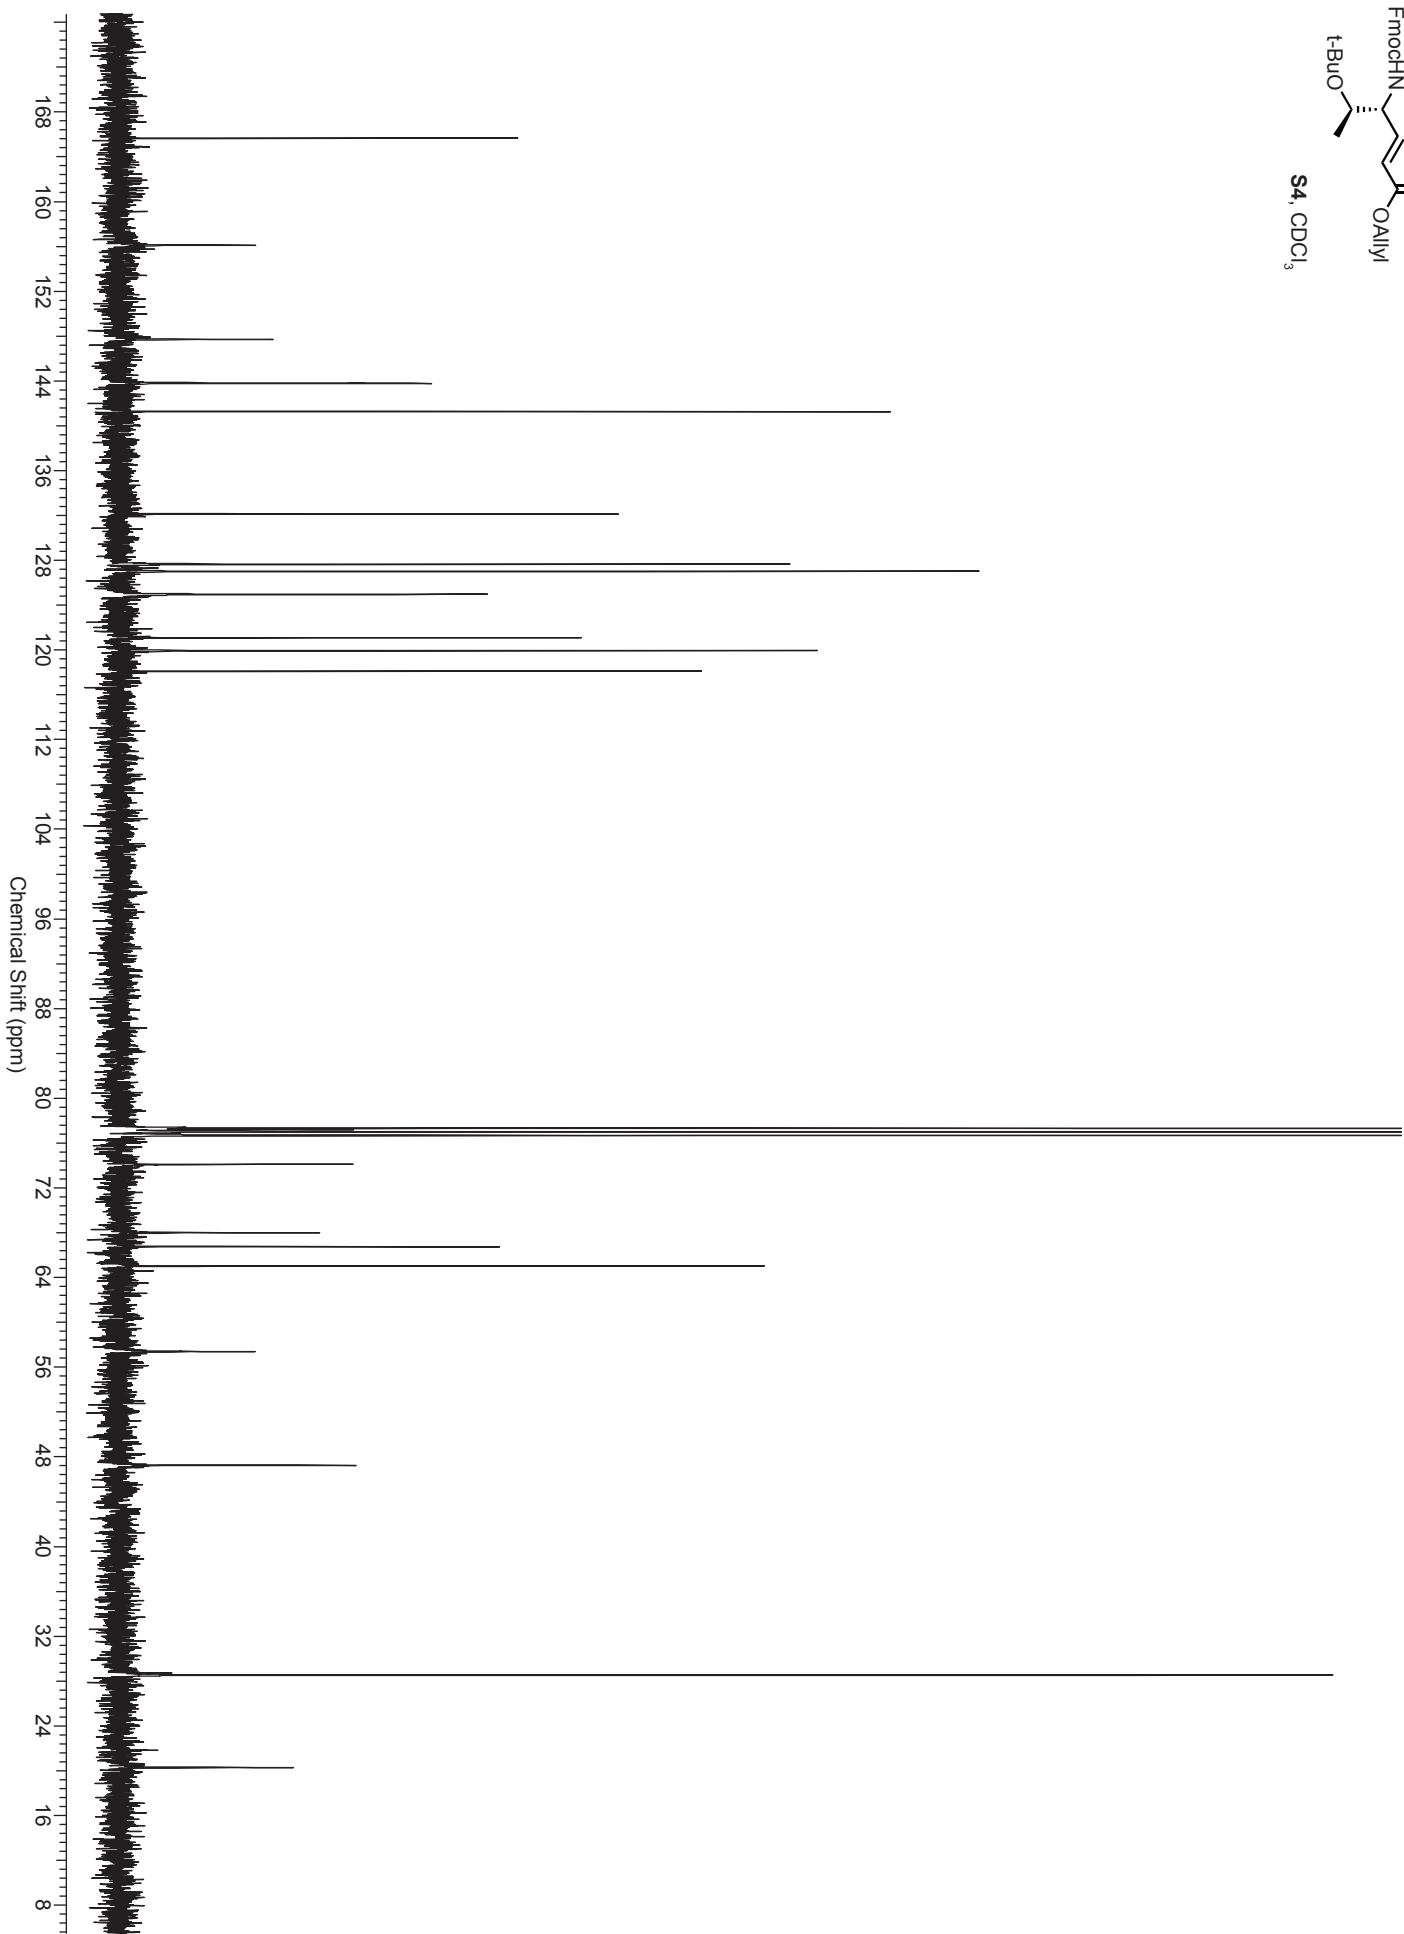

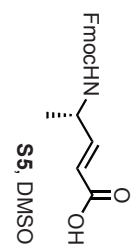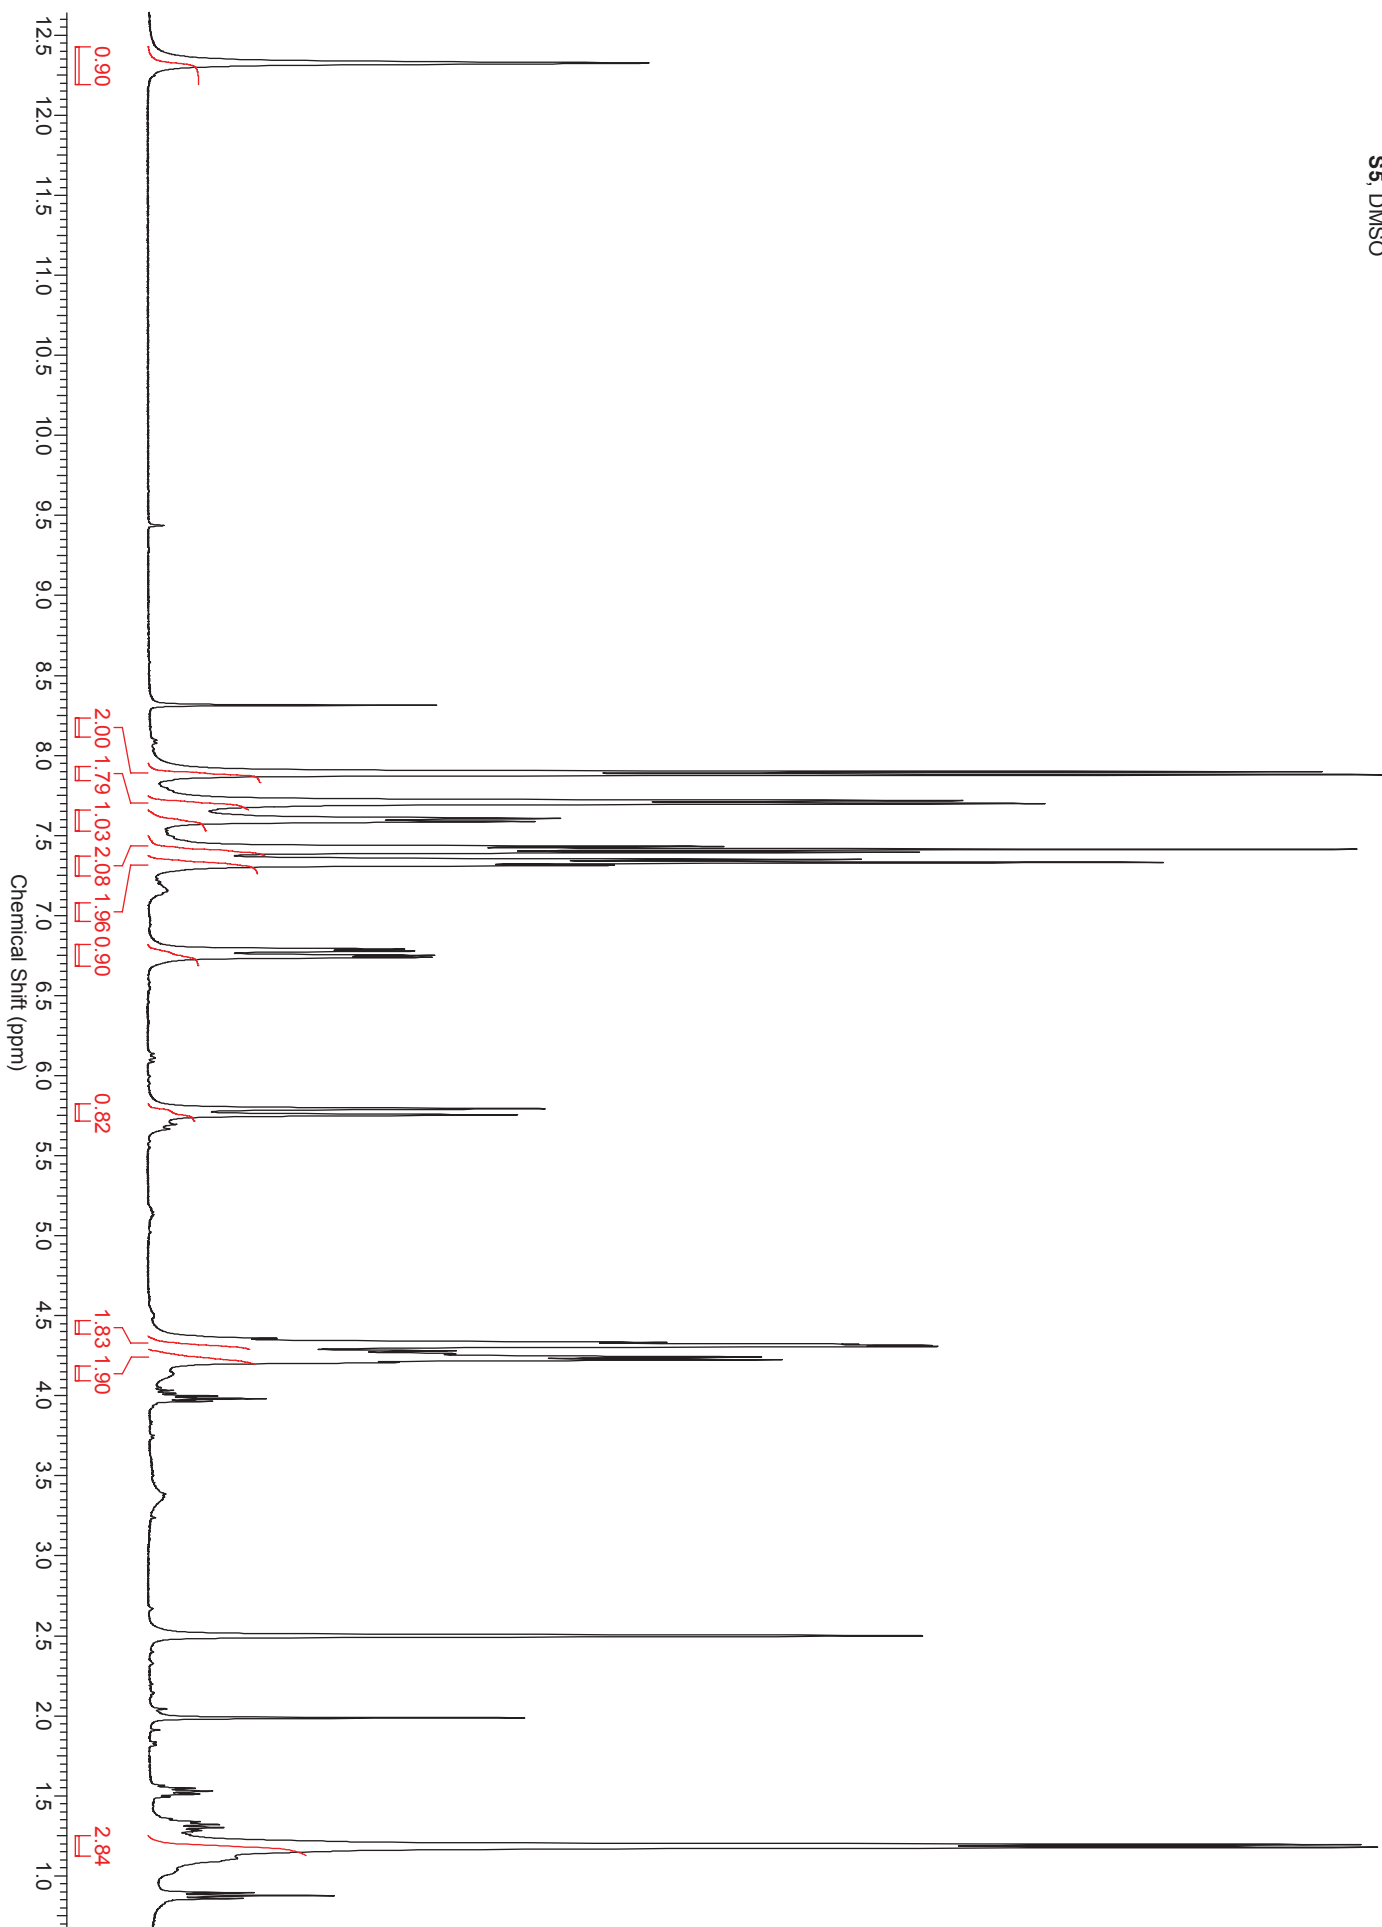

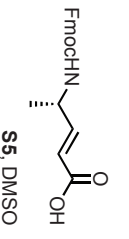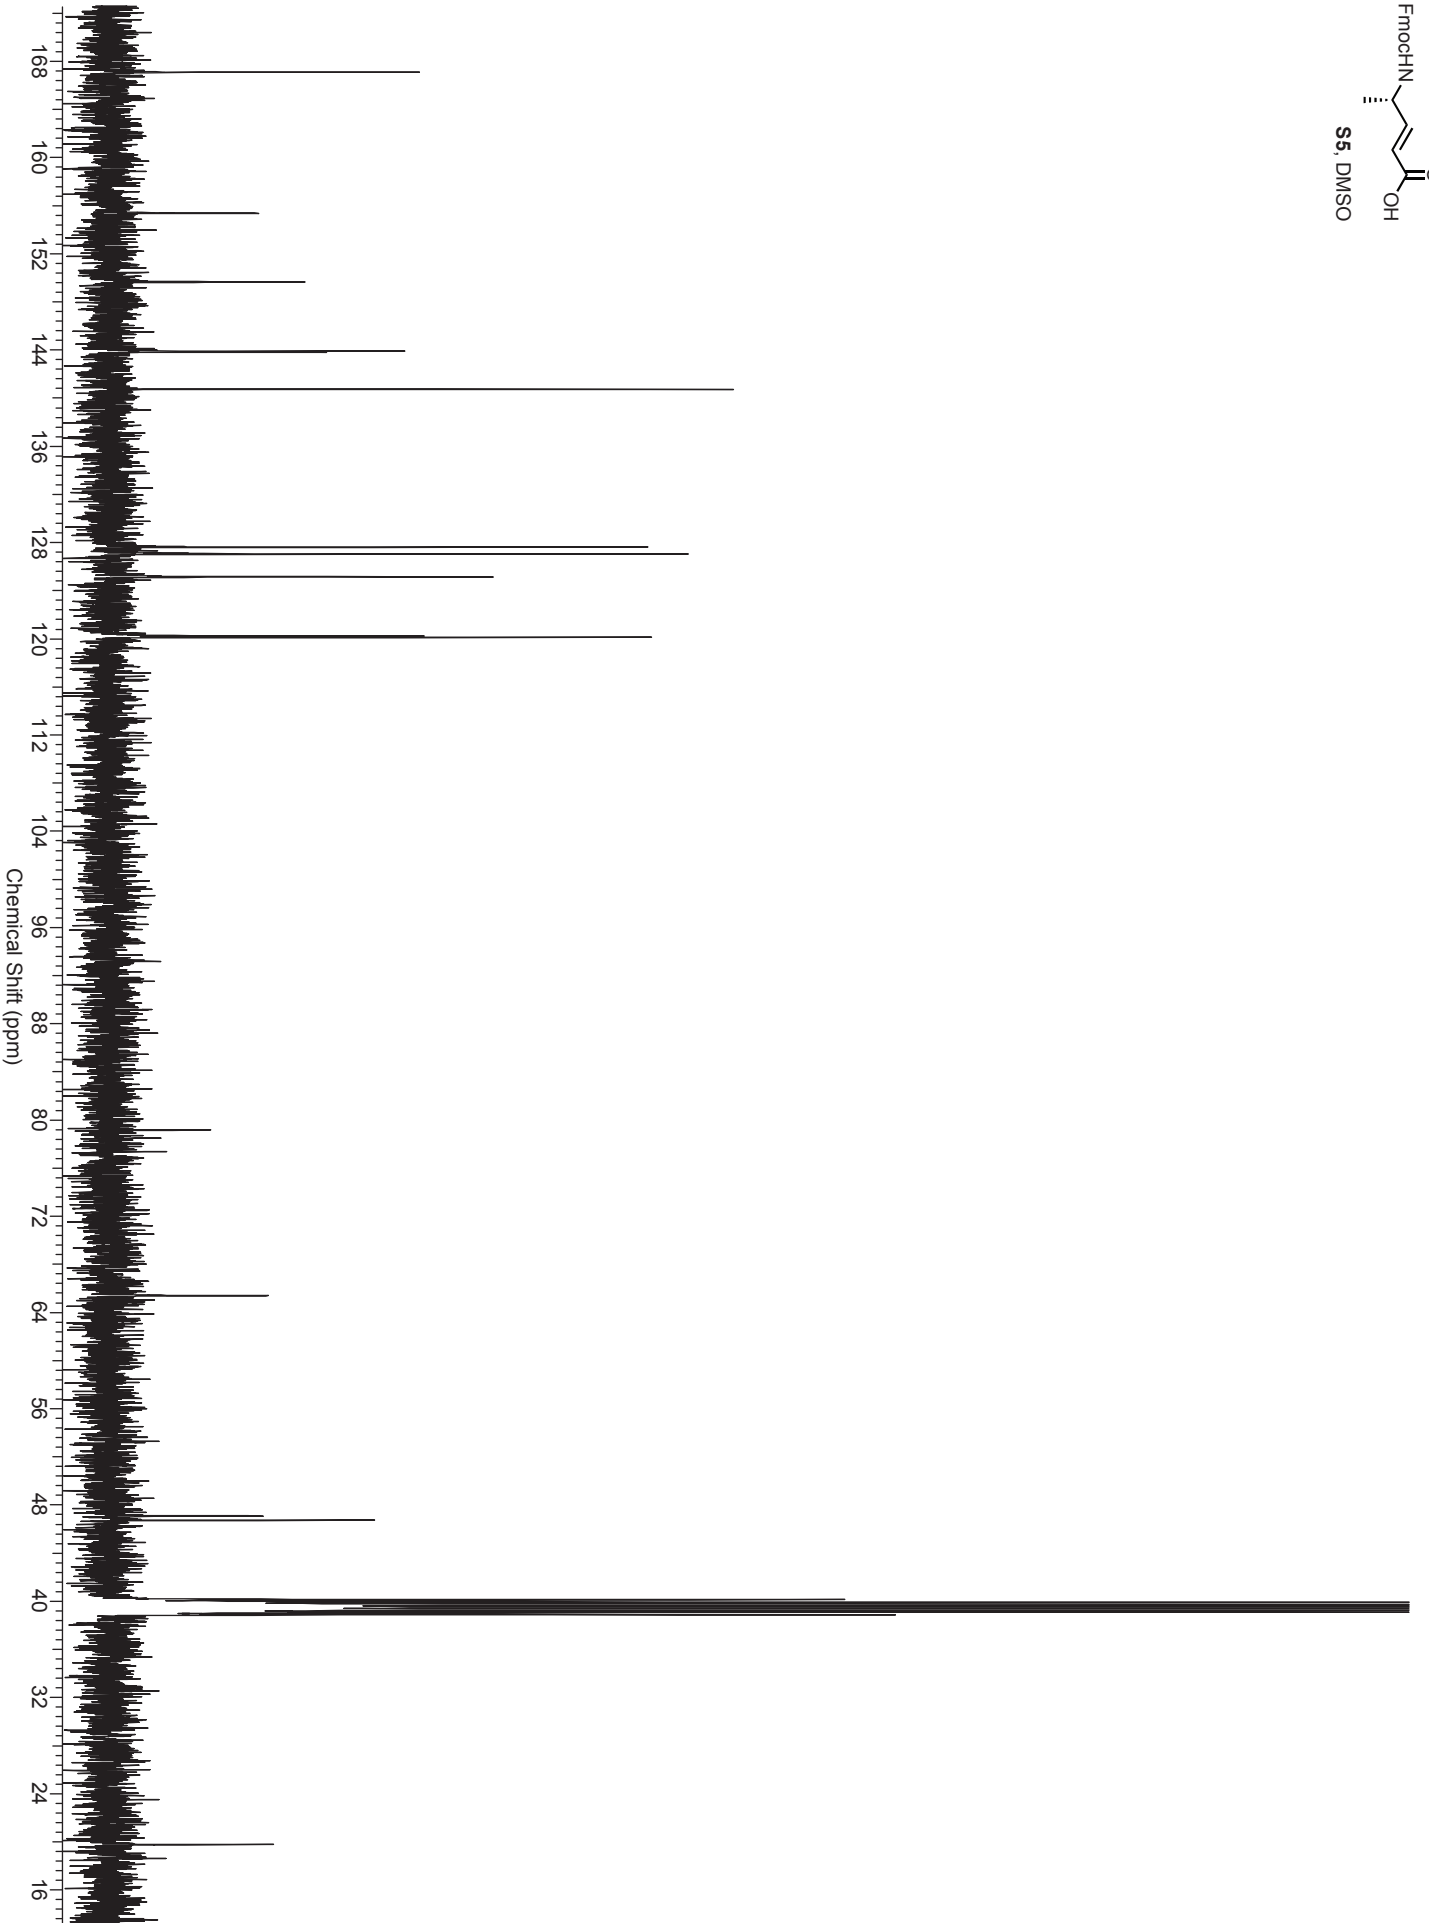

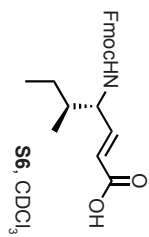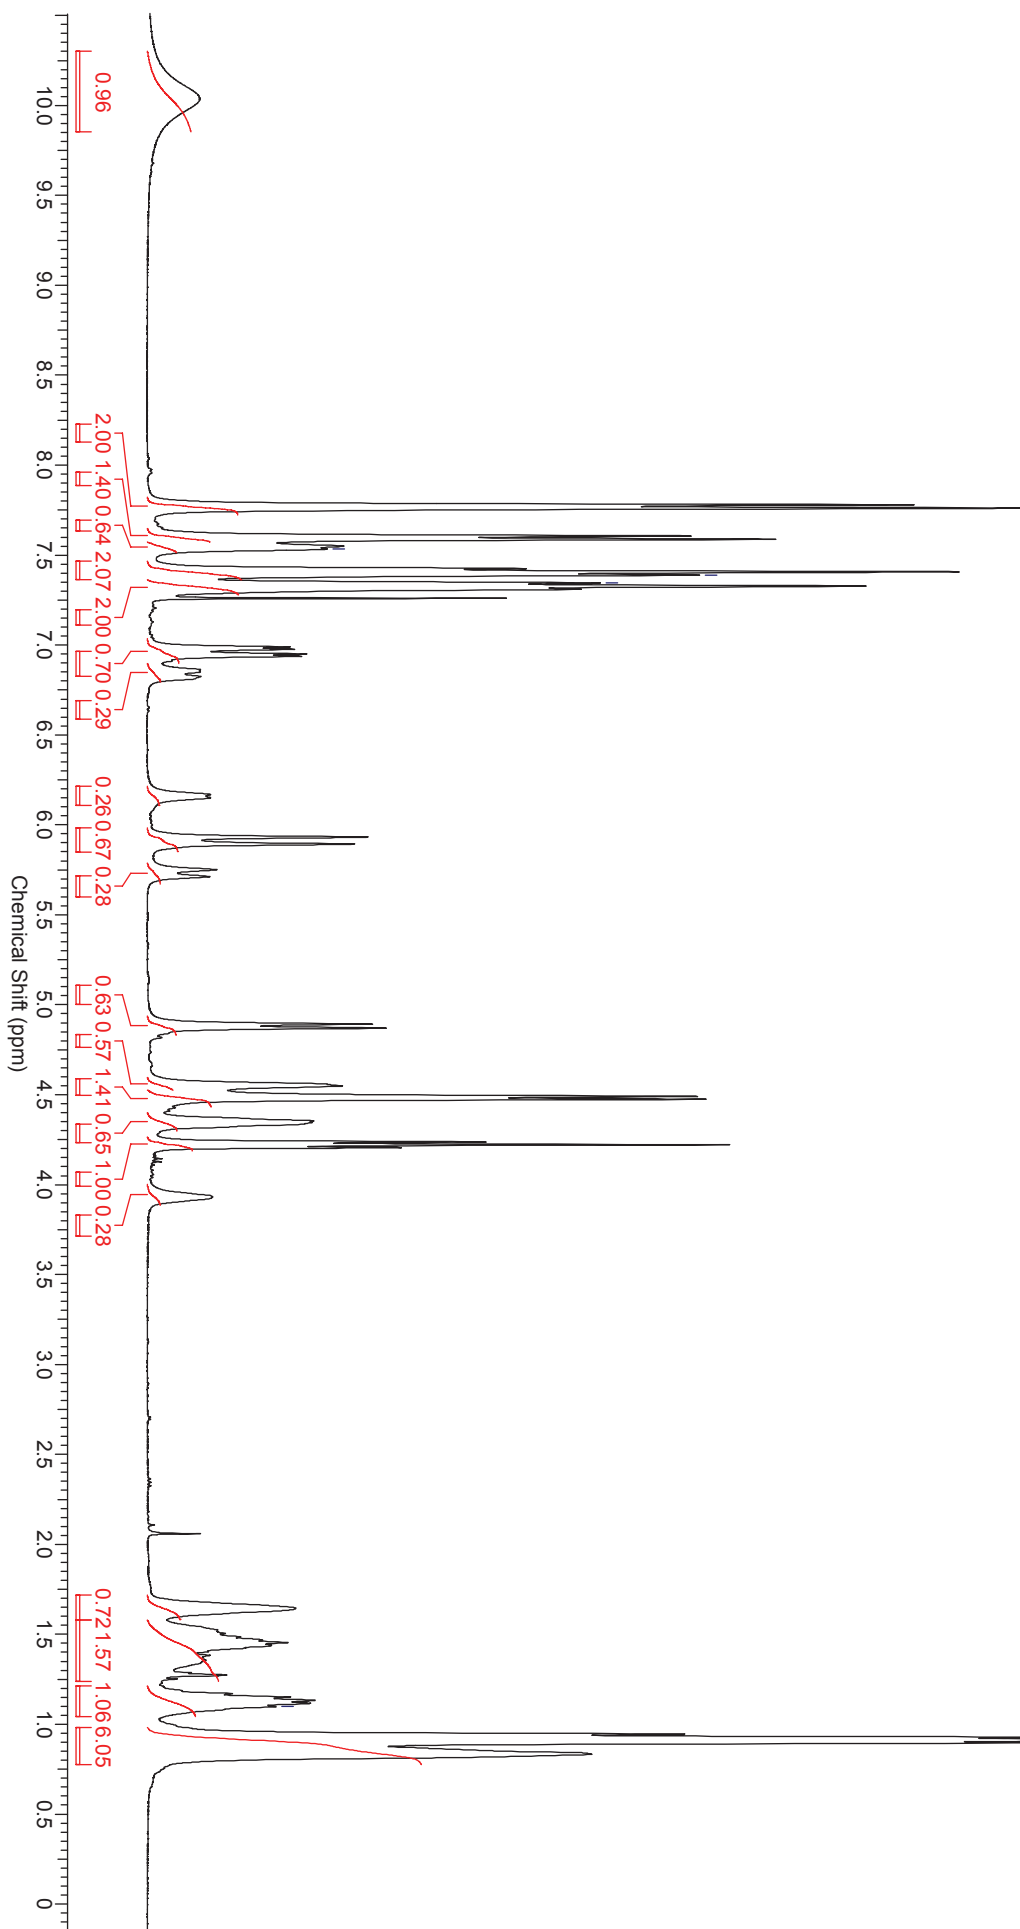

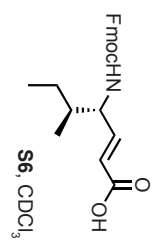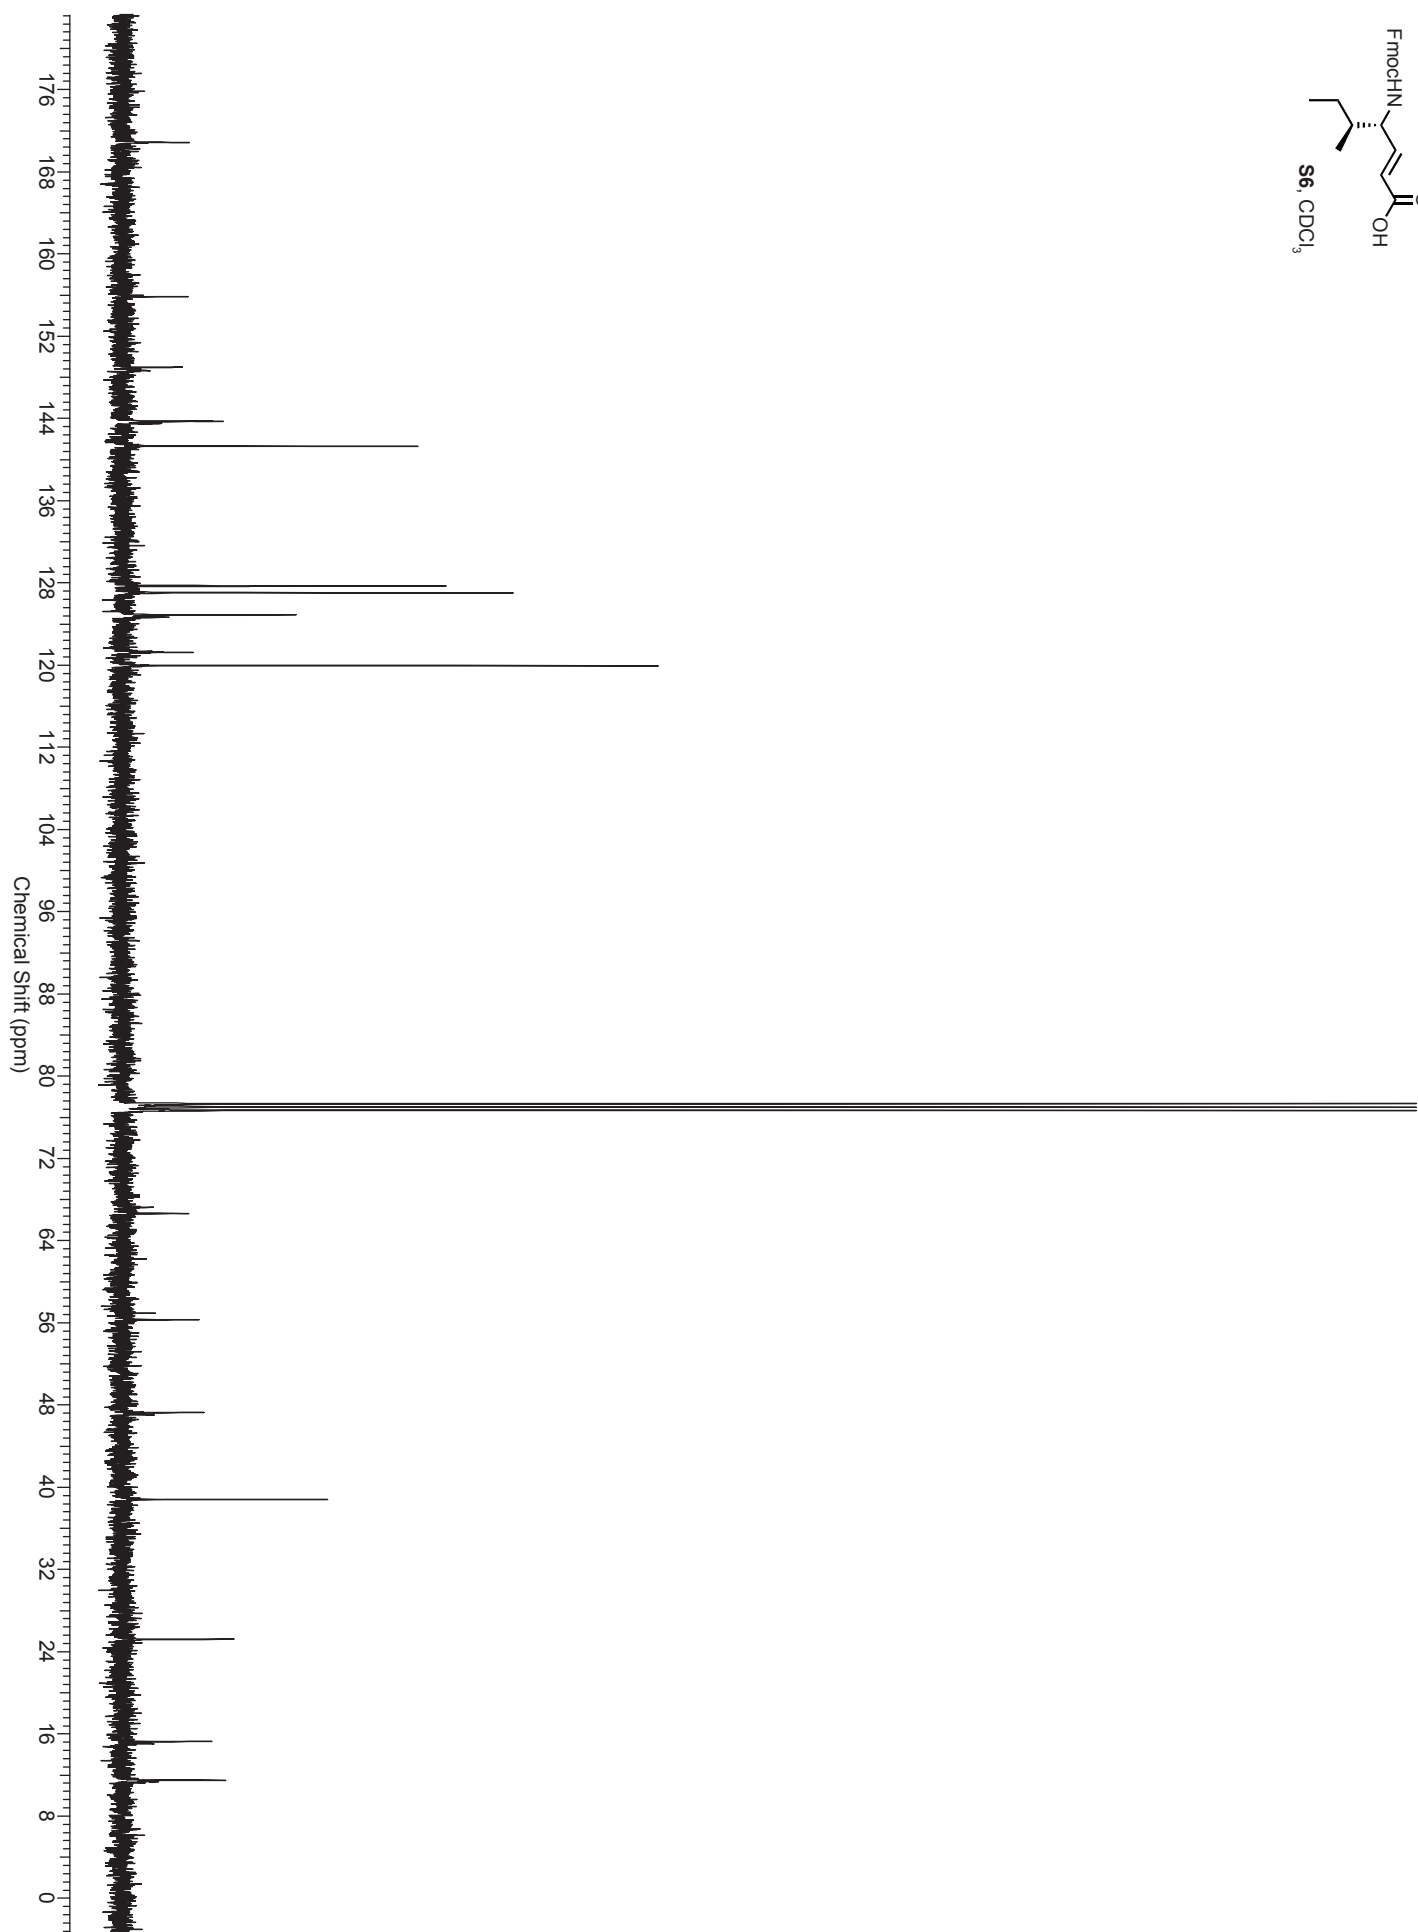

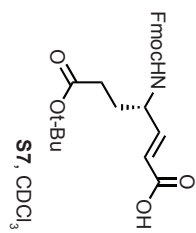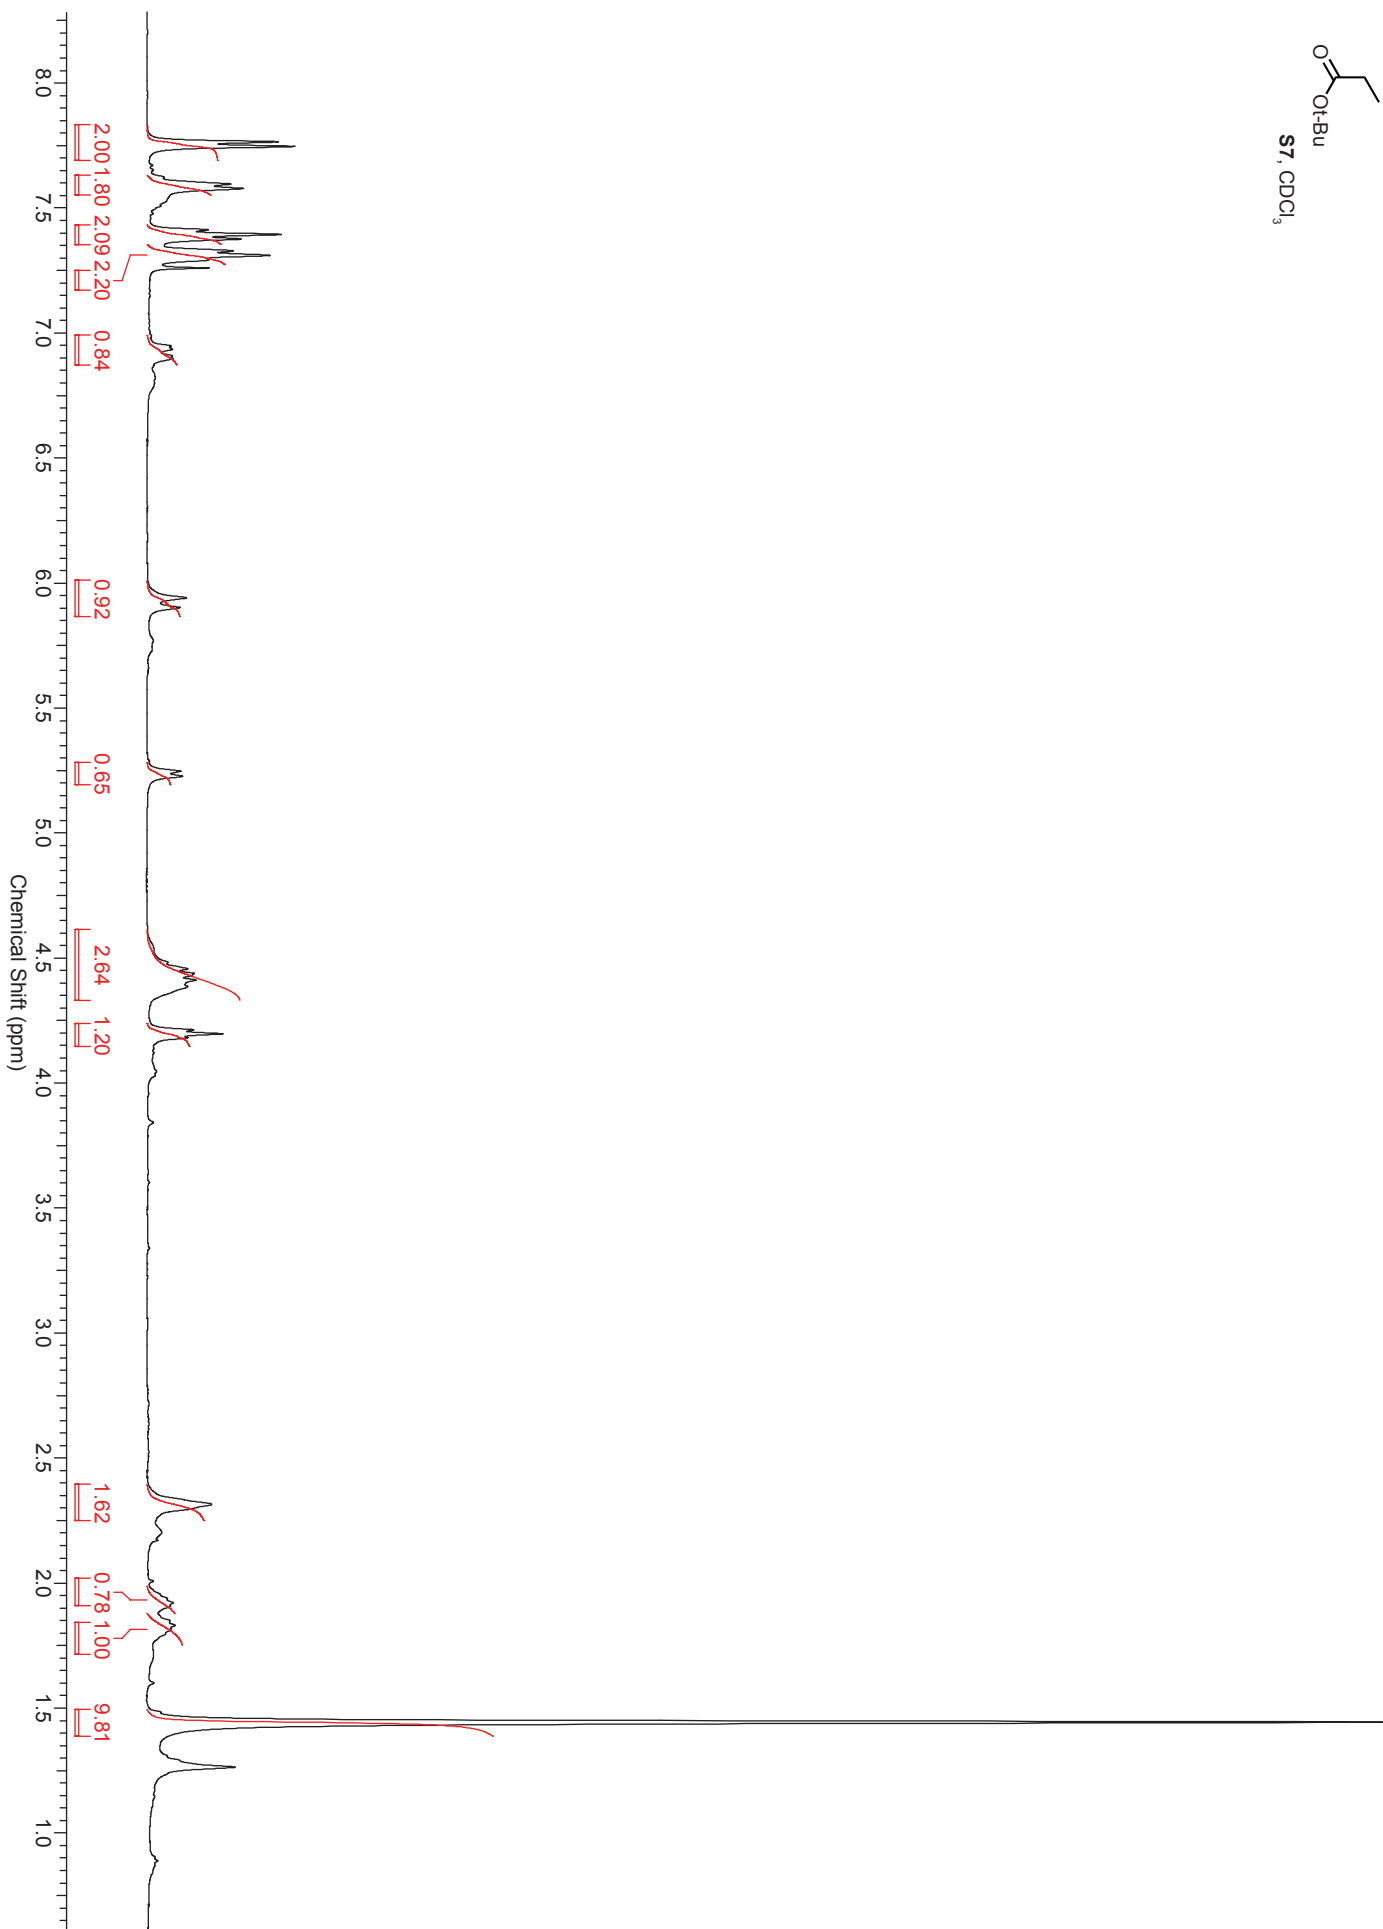

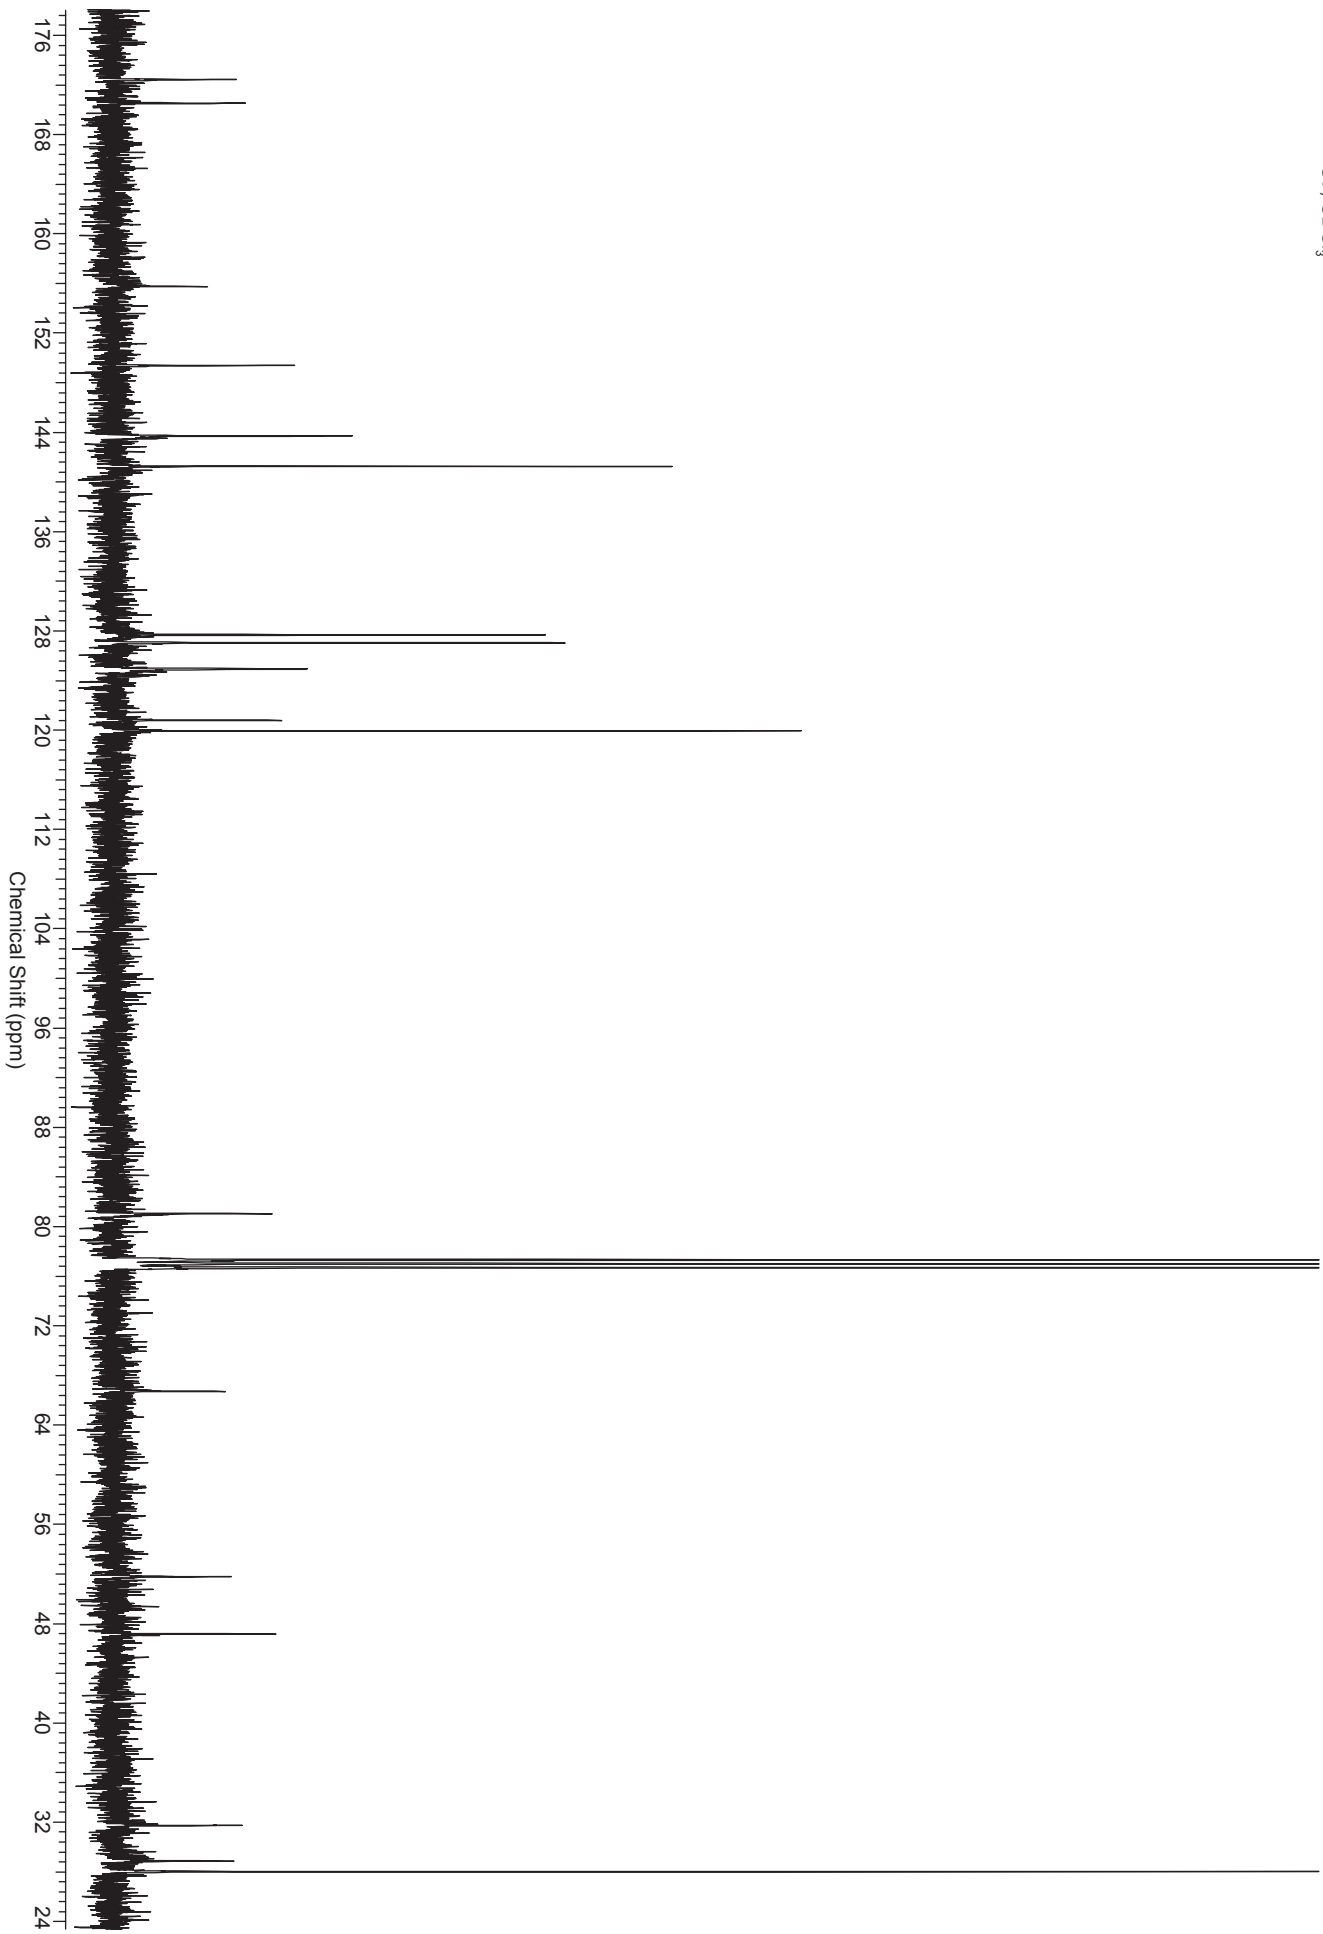

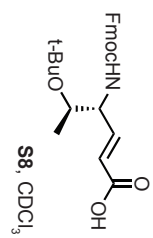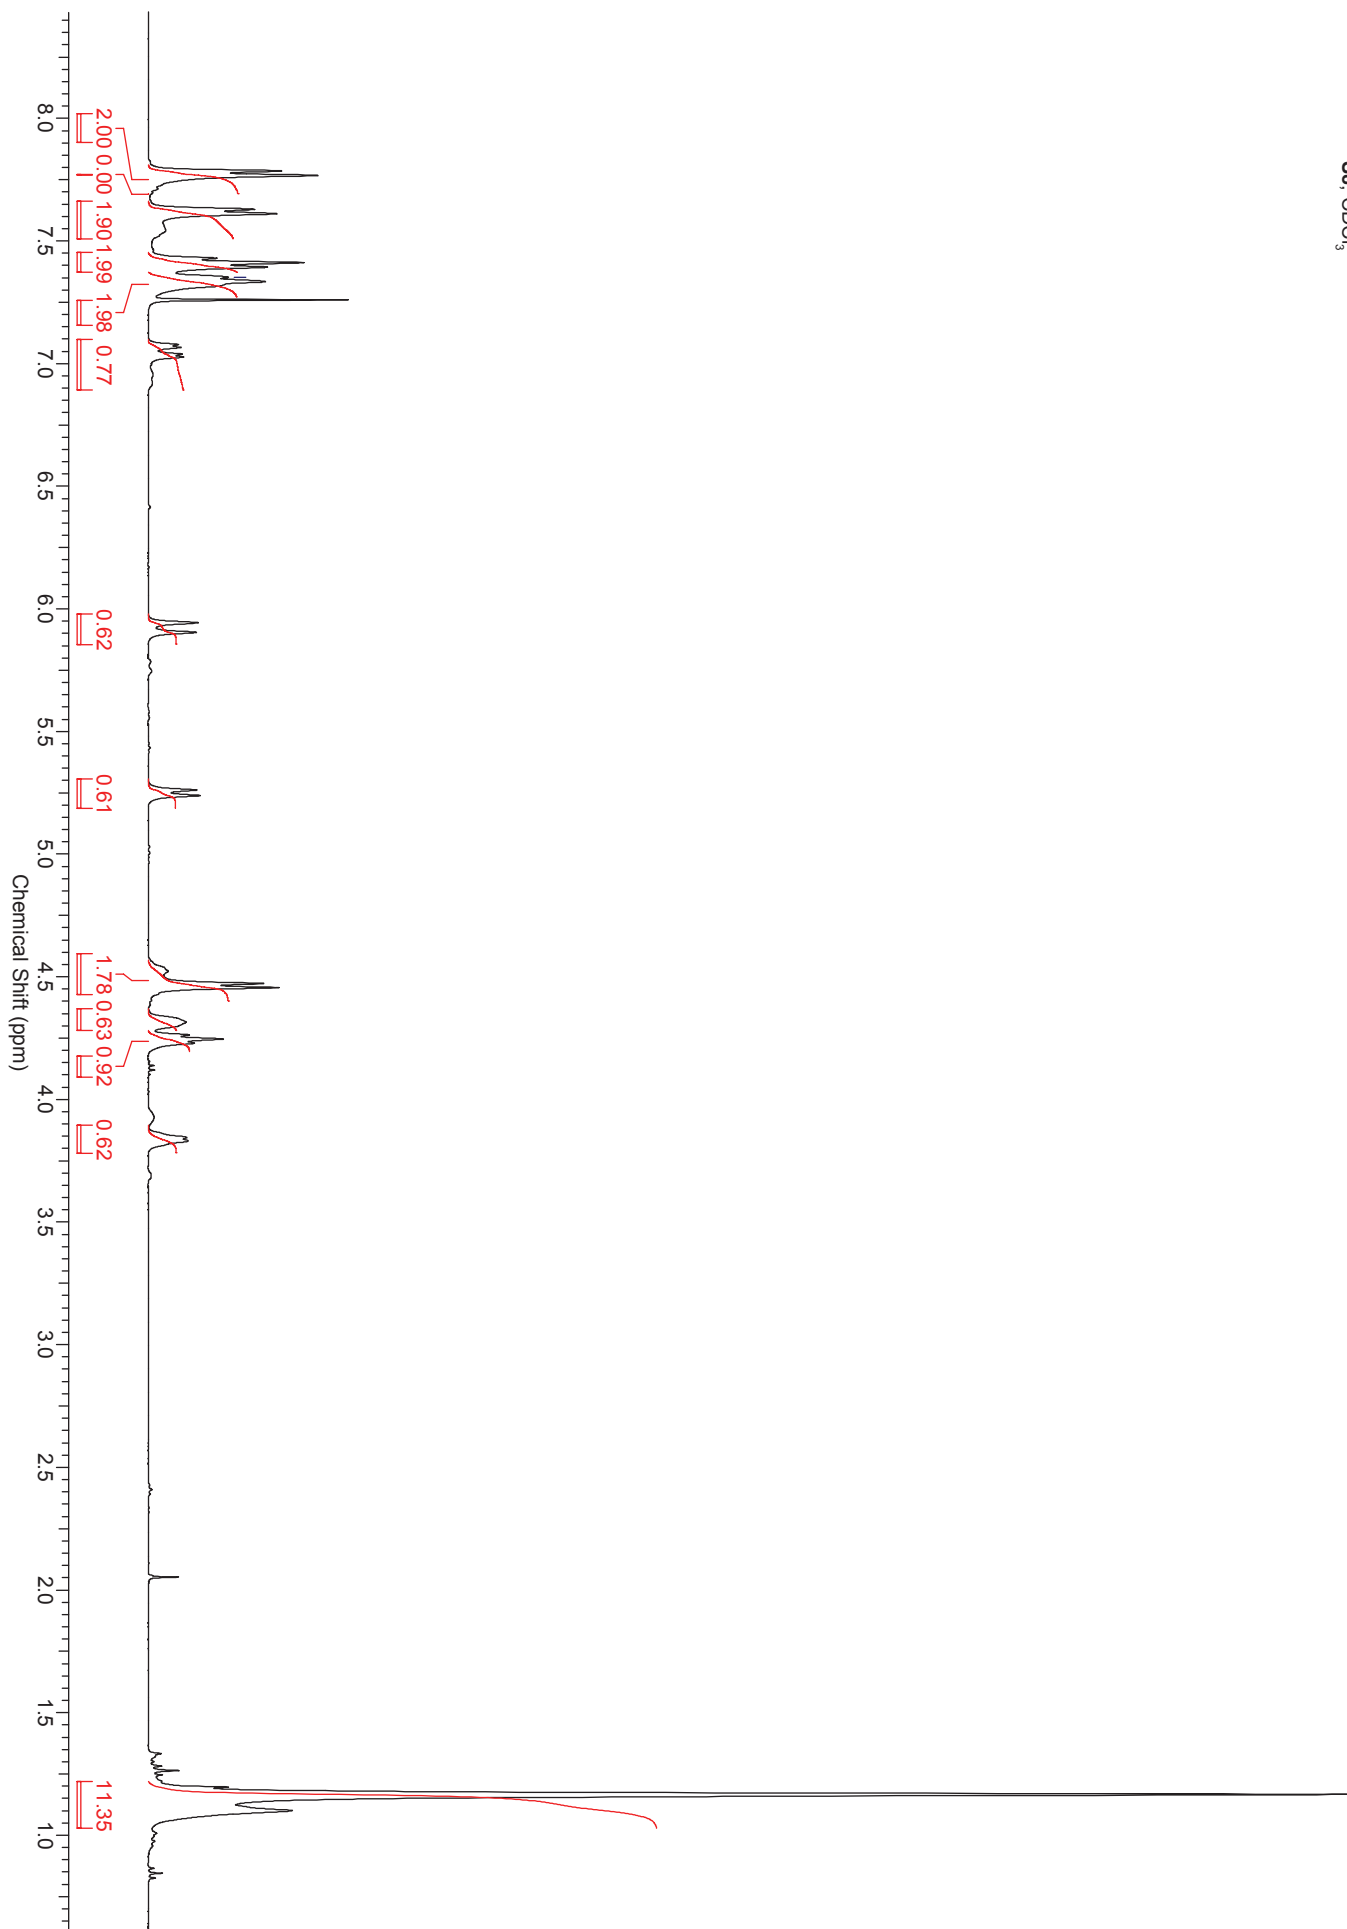



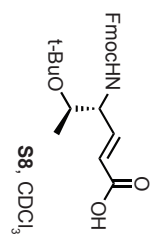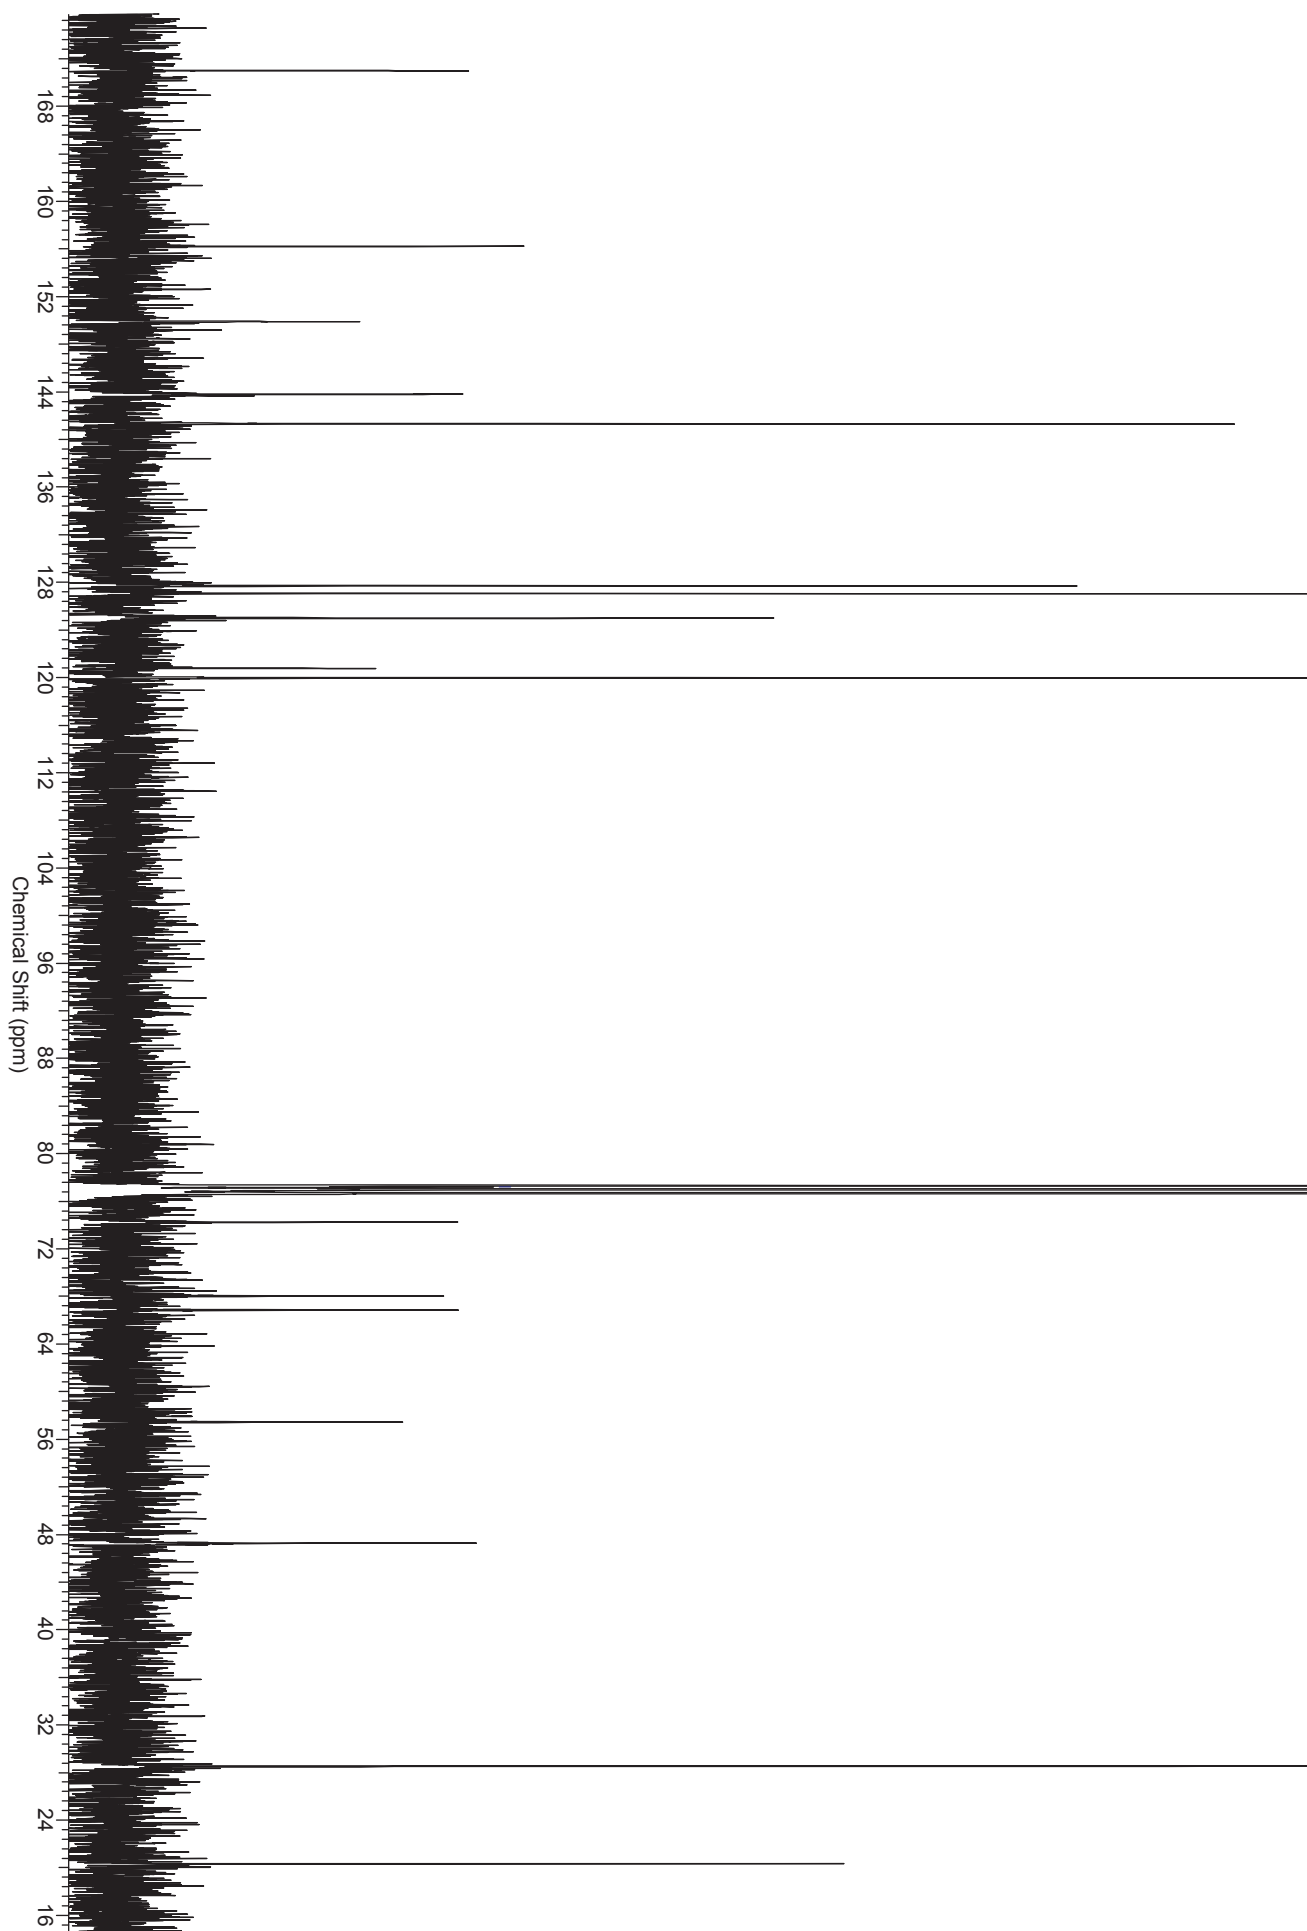

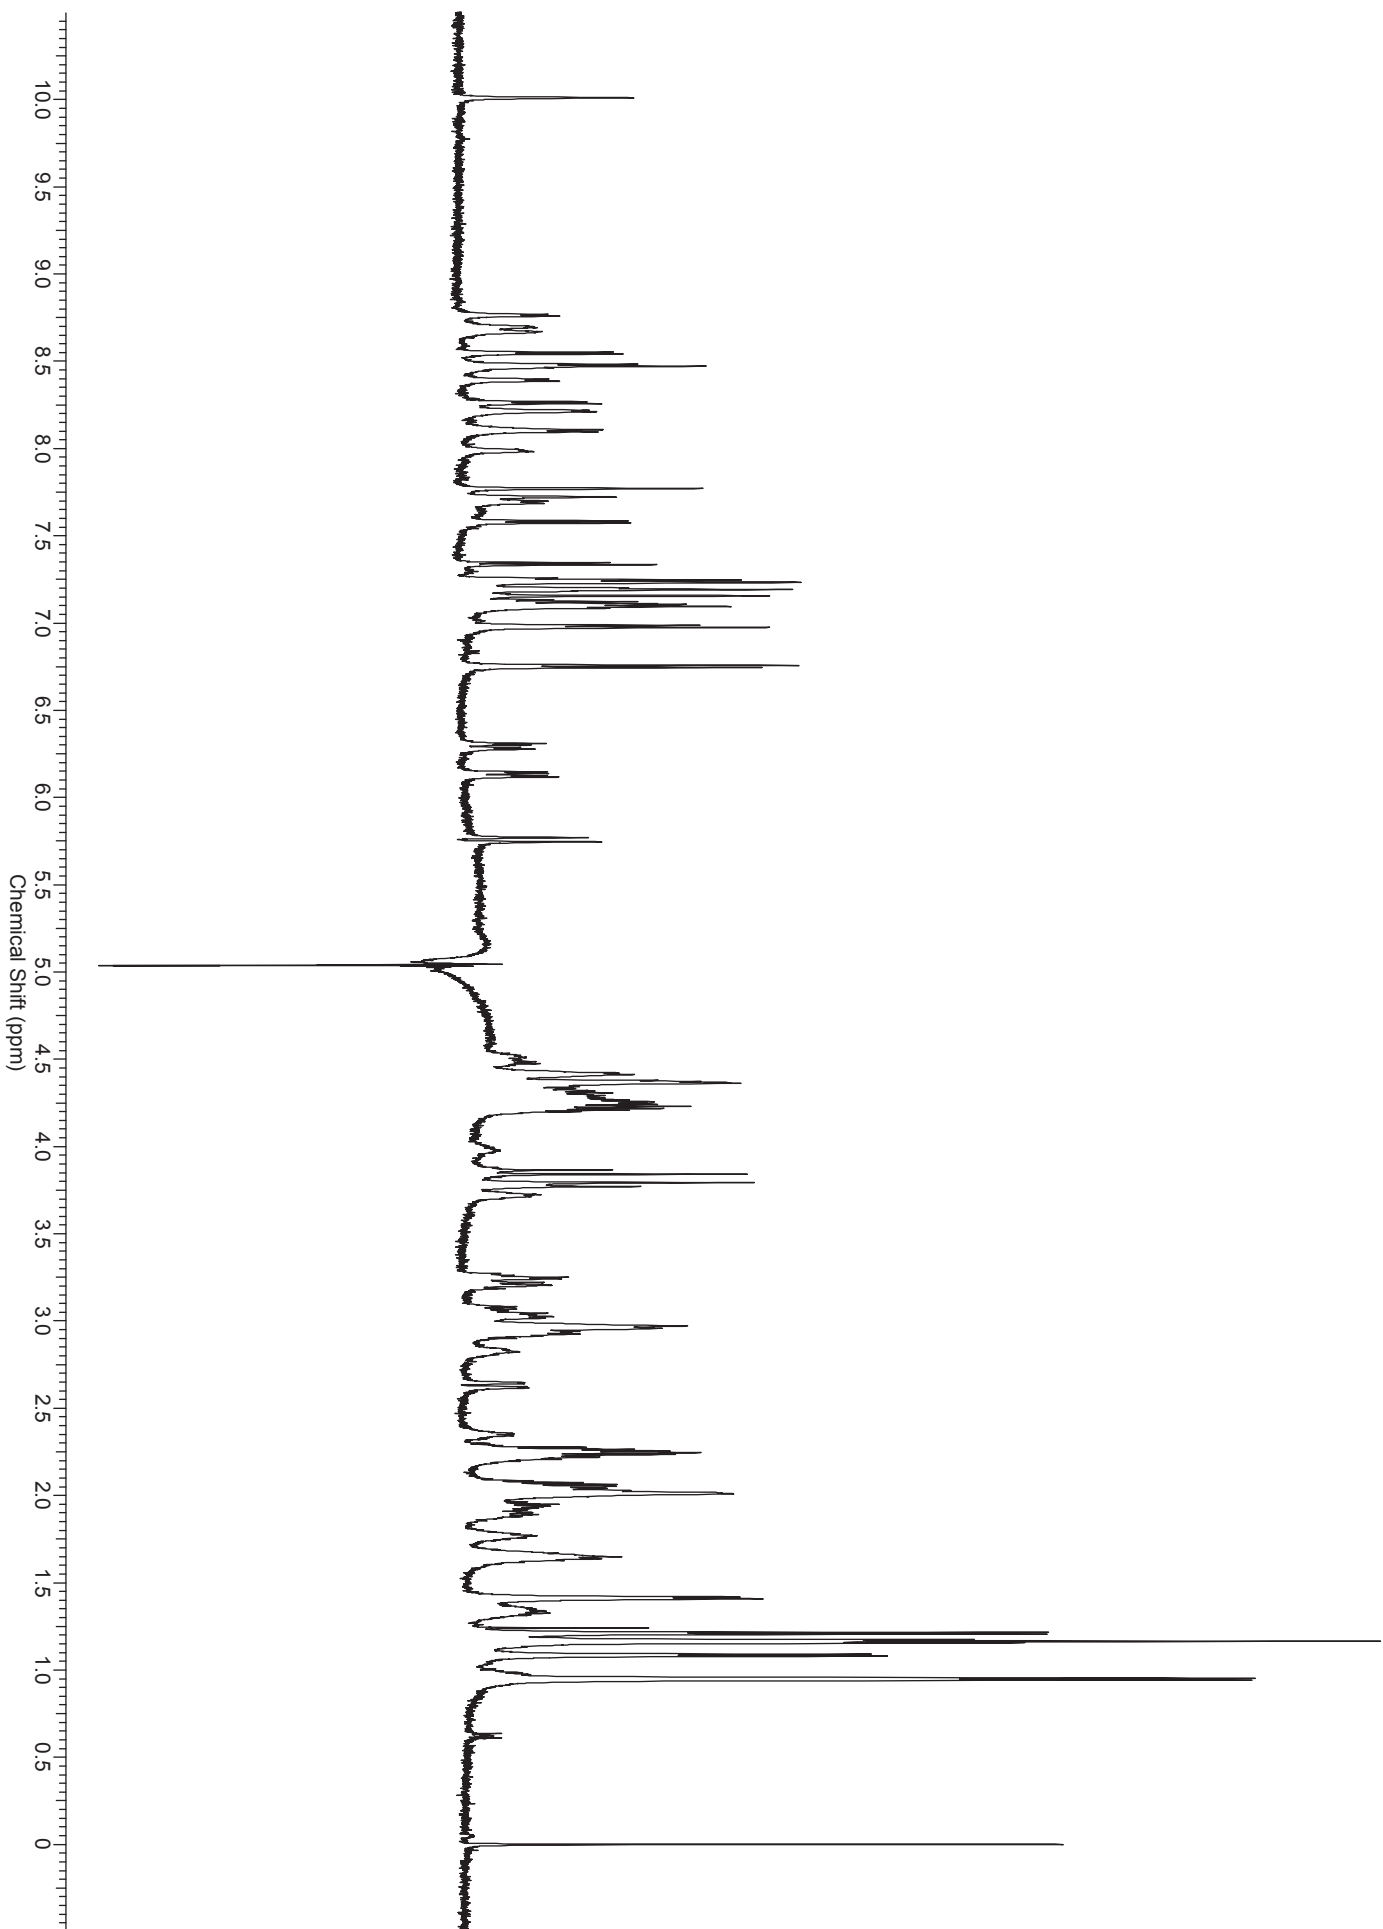

Peptide 3  
cyc

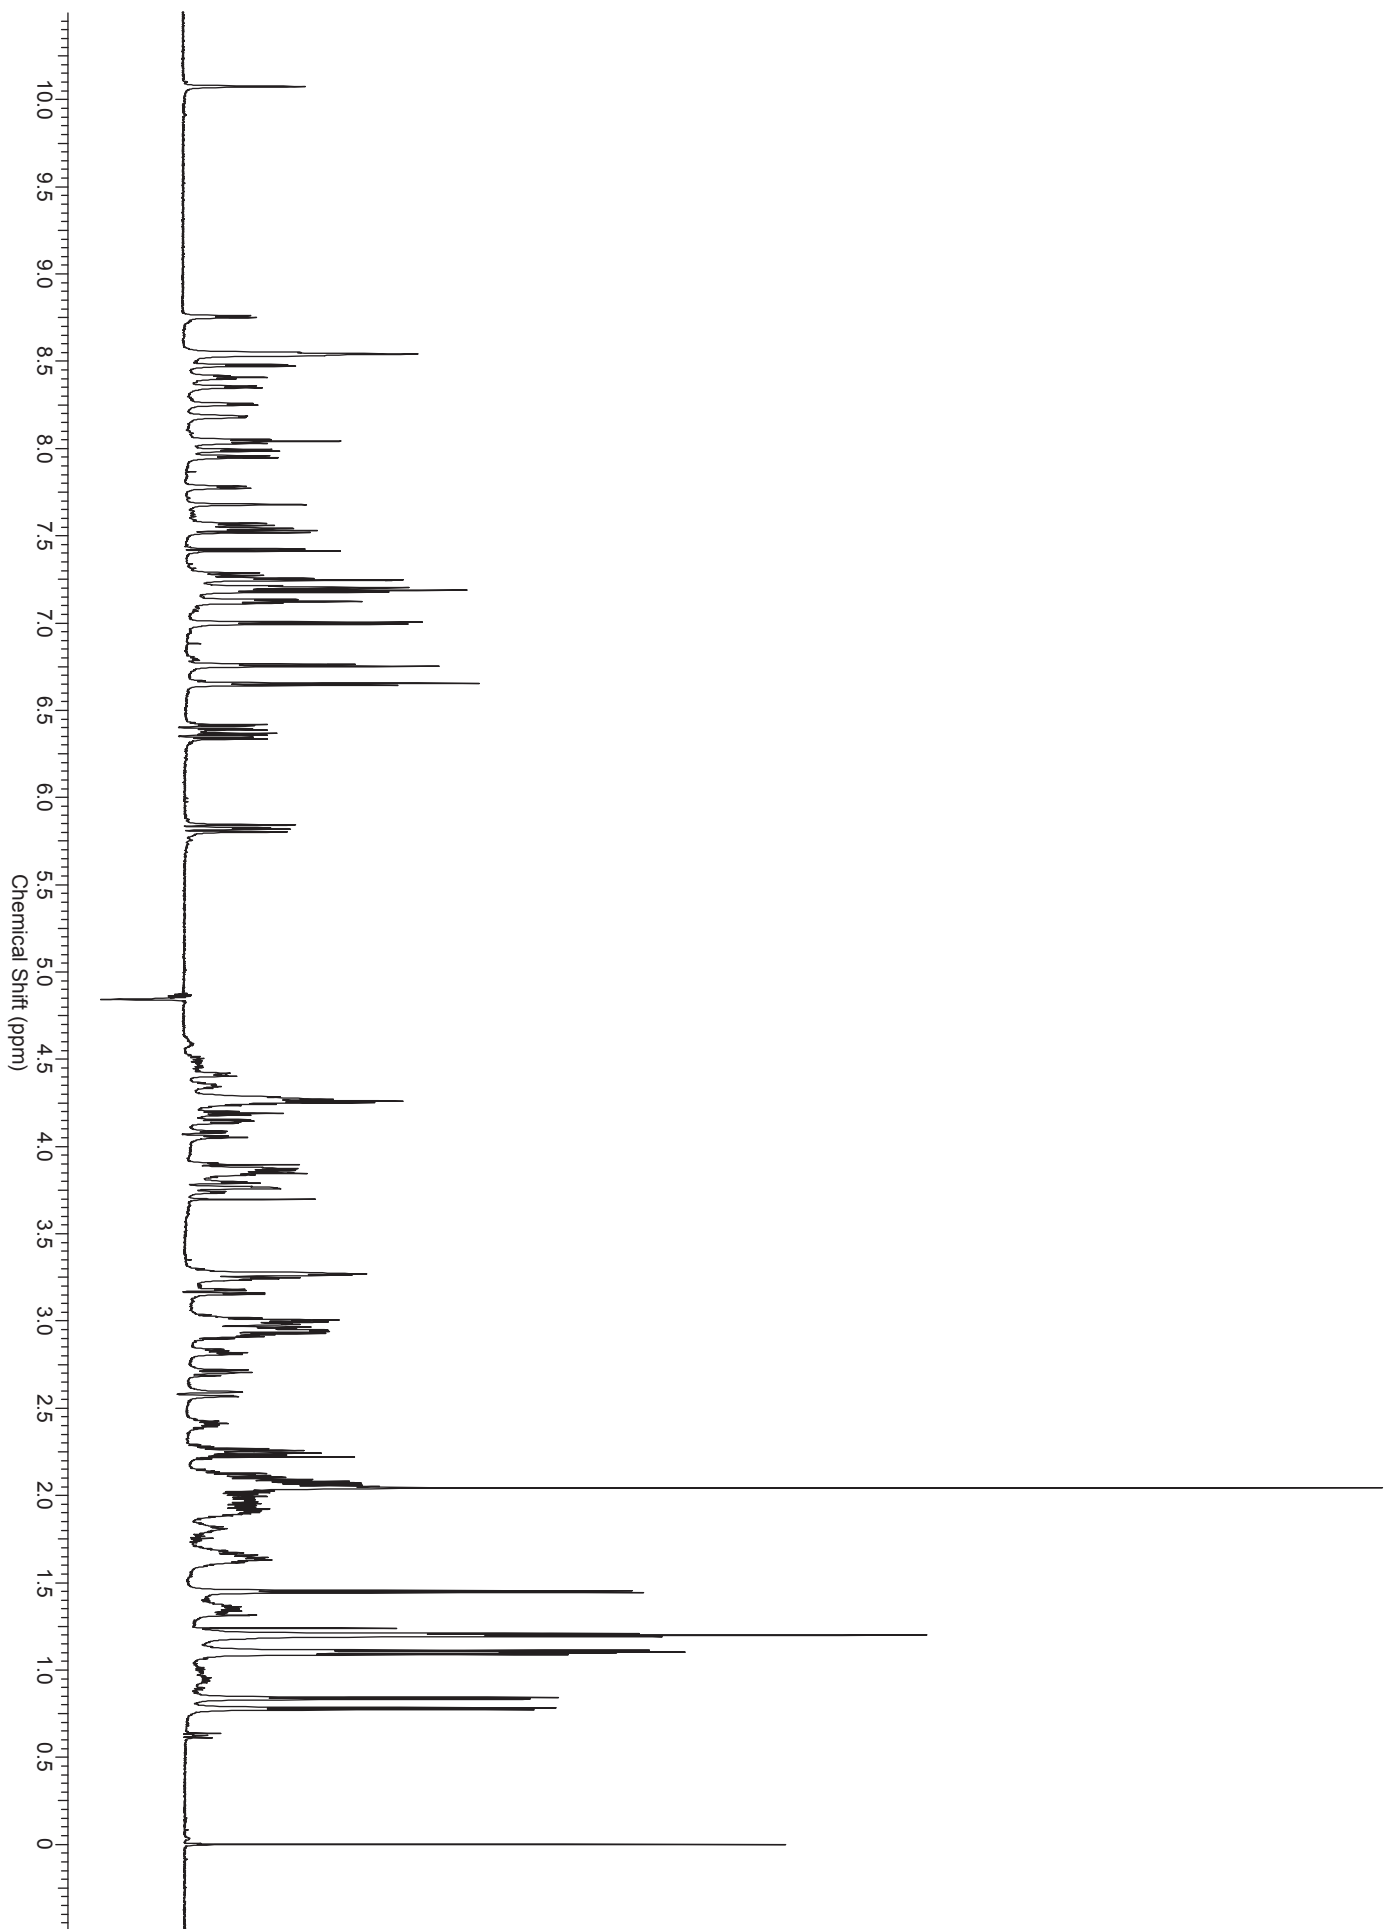

Peptide 4

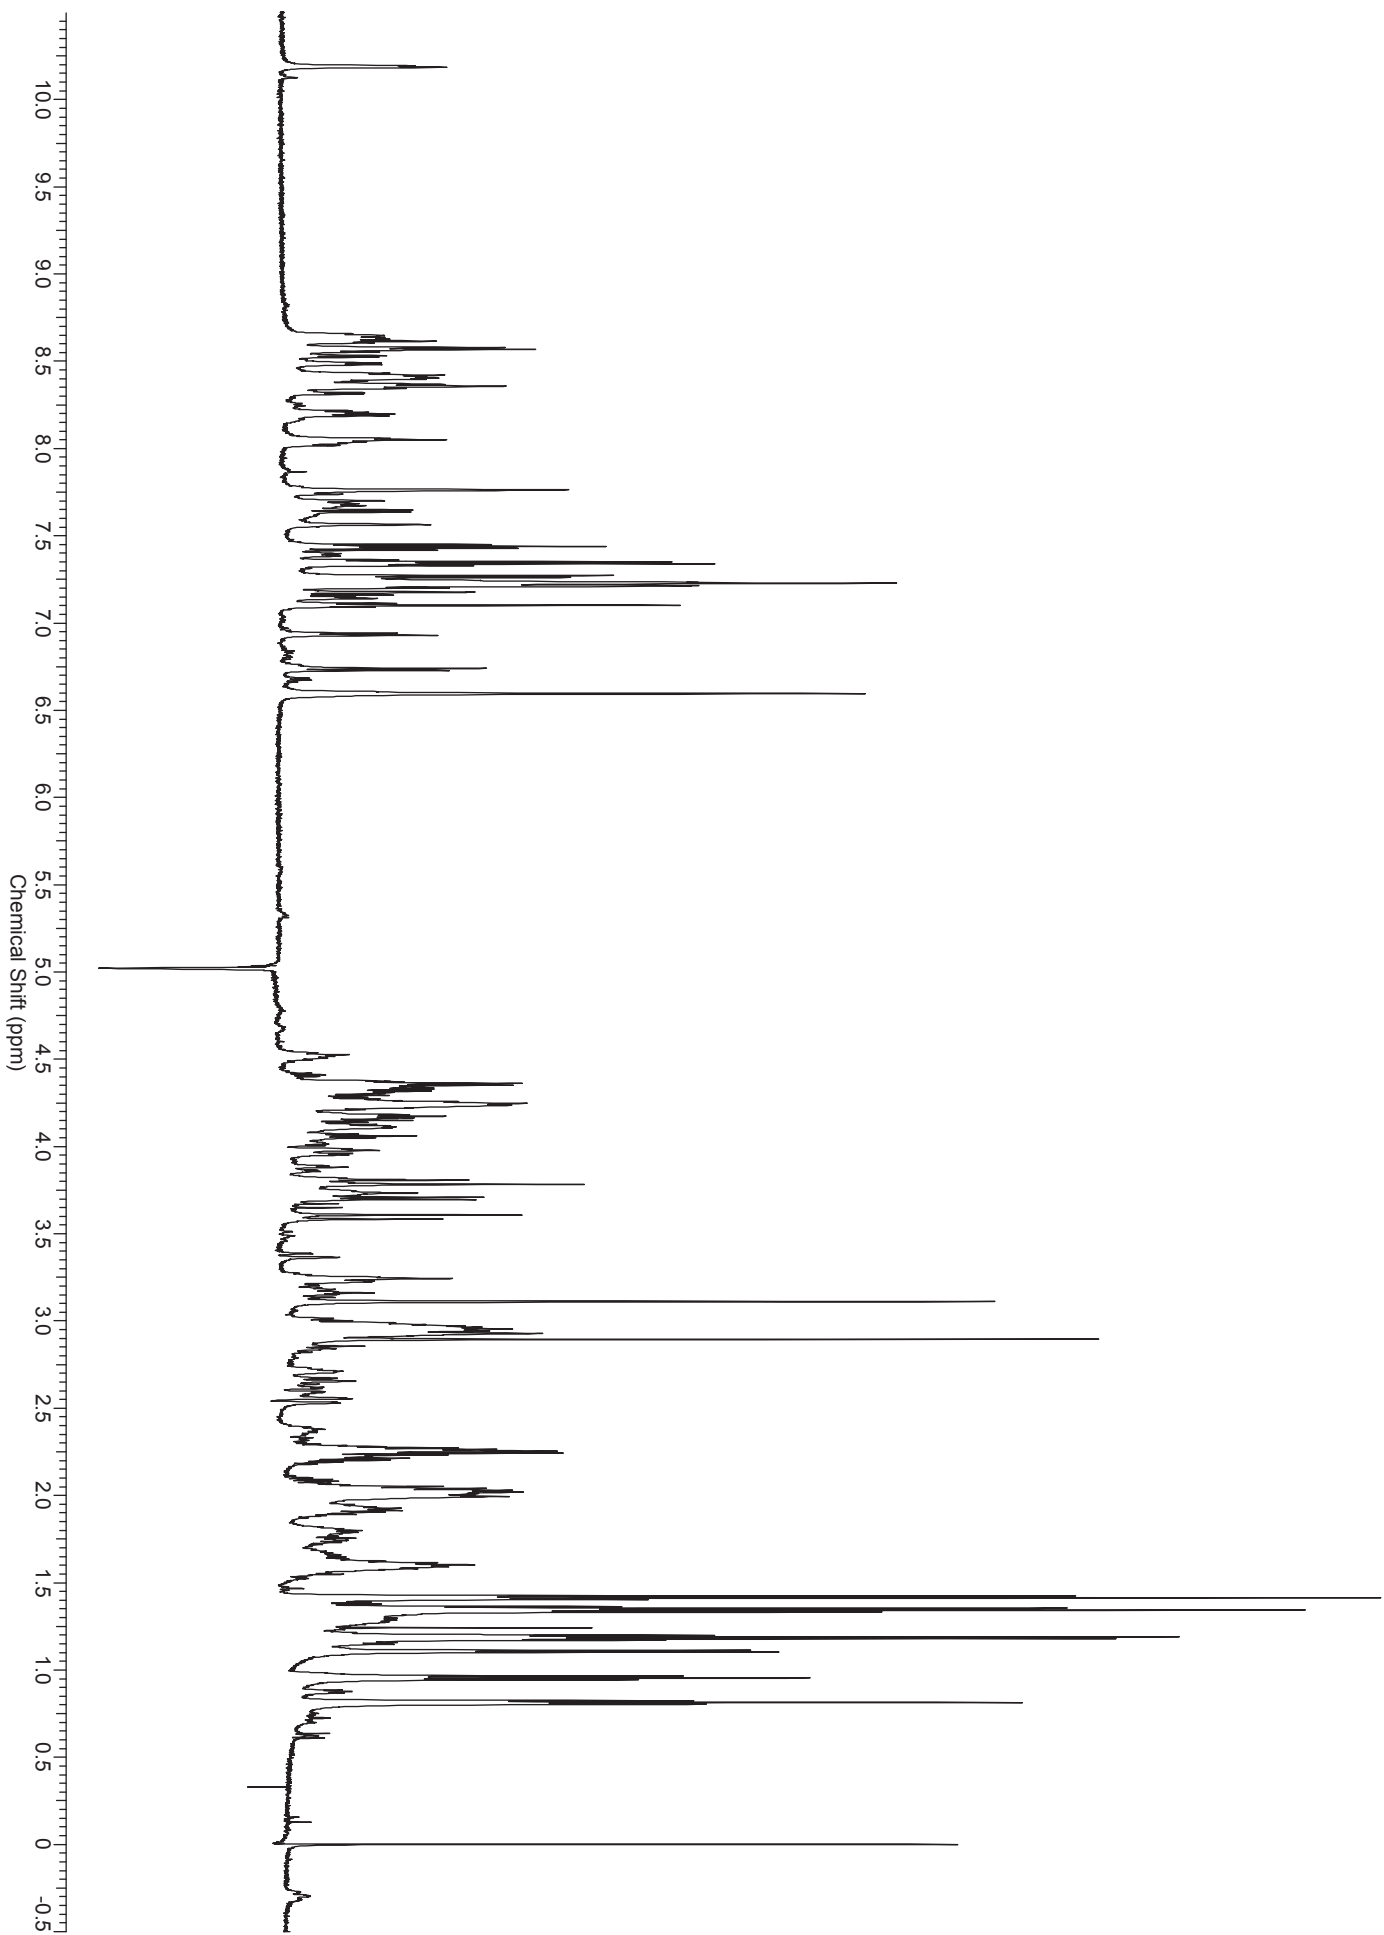

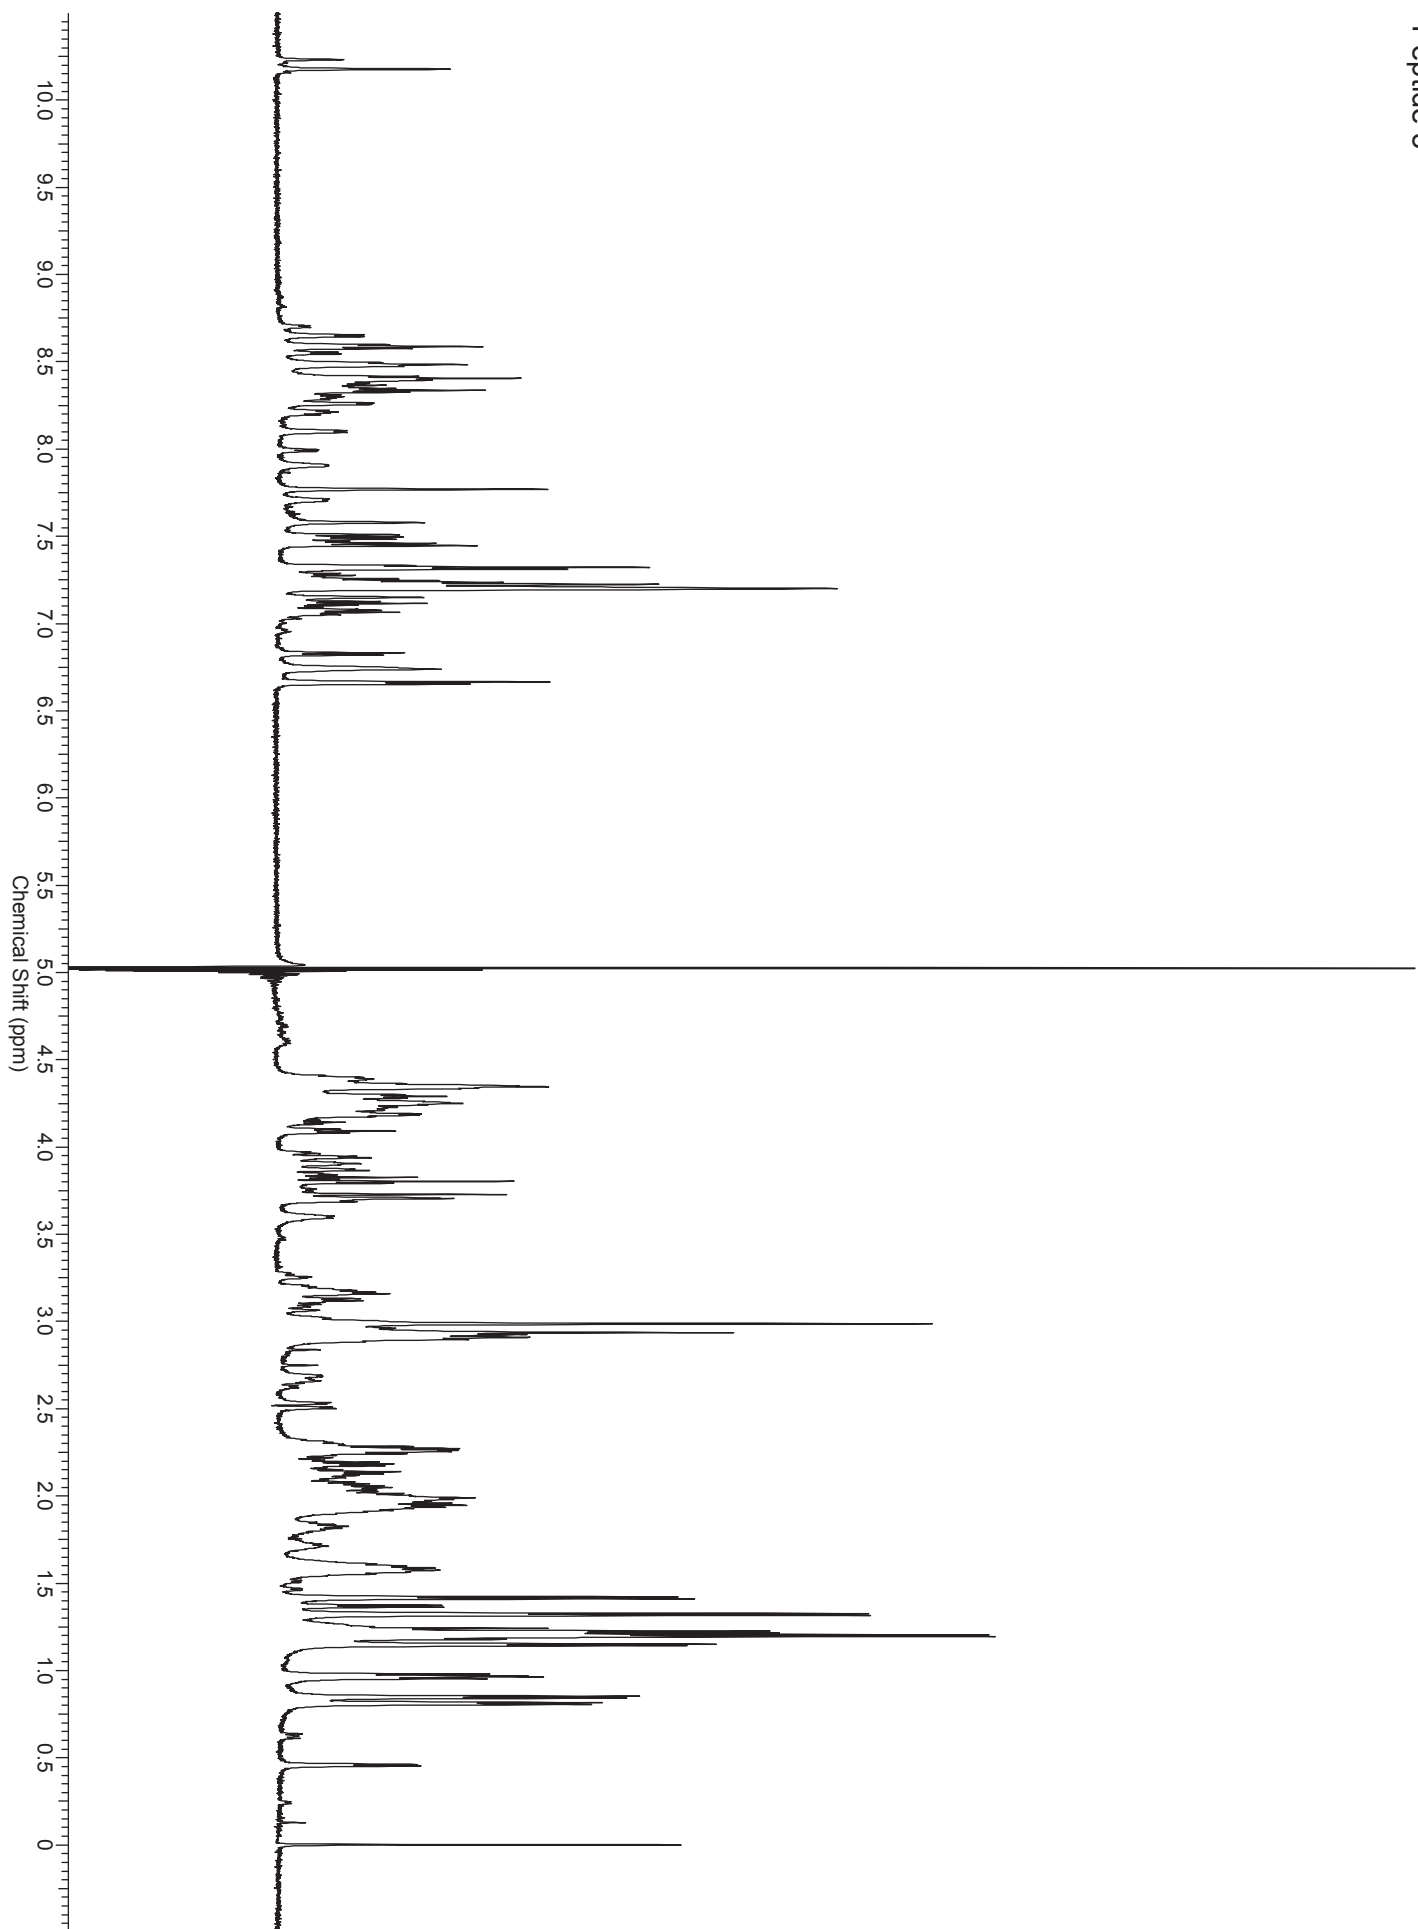

Peptide 6

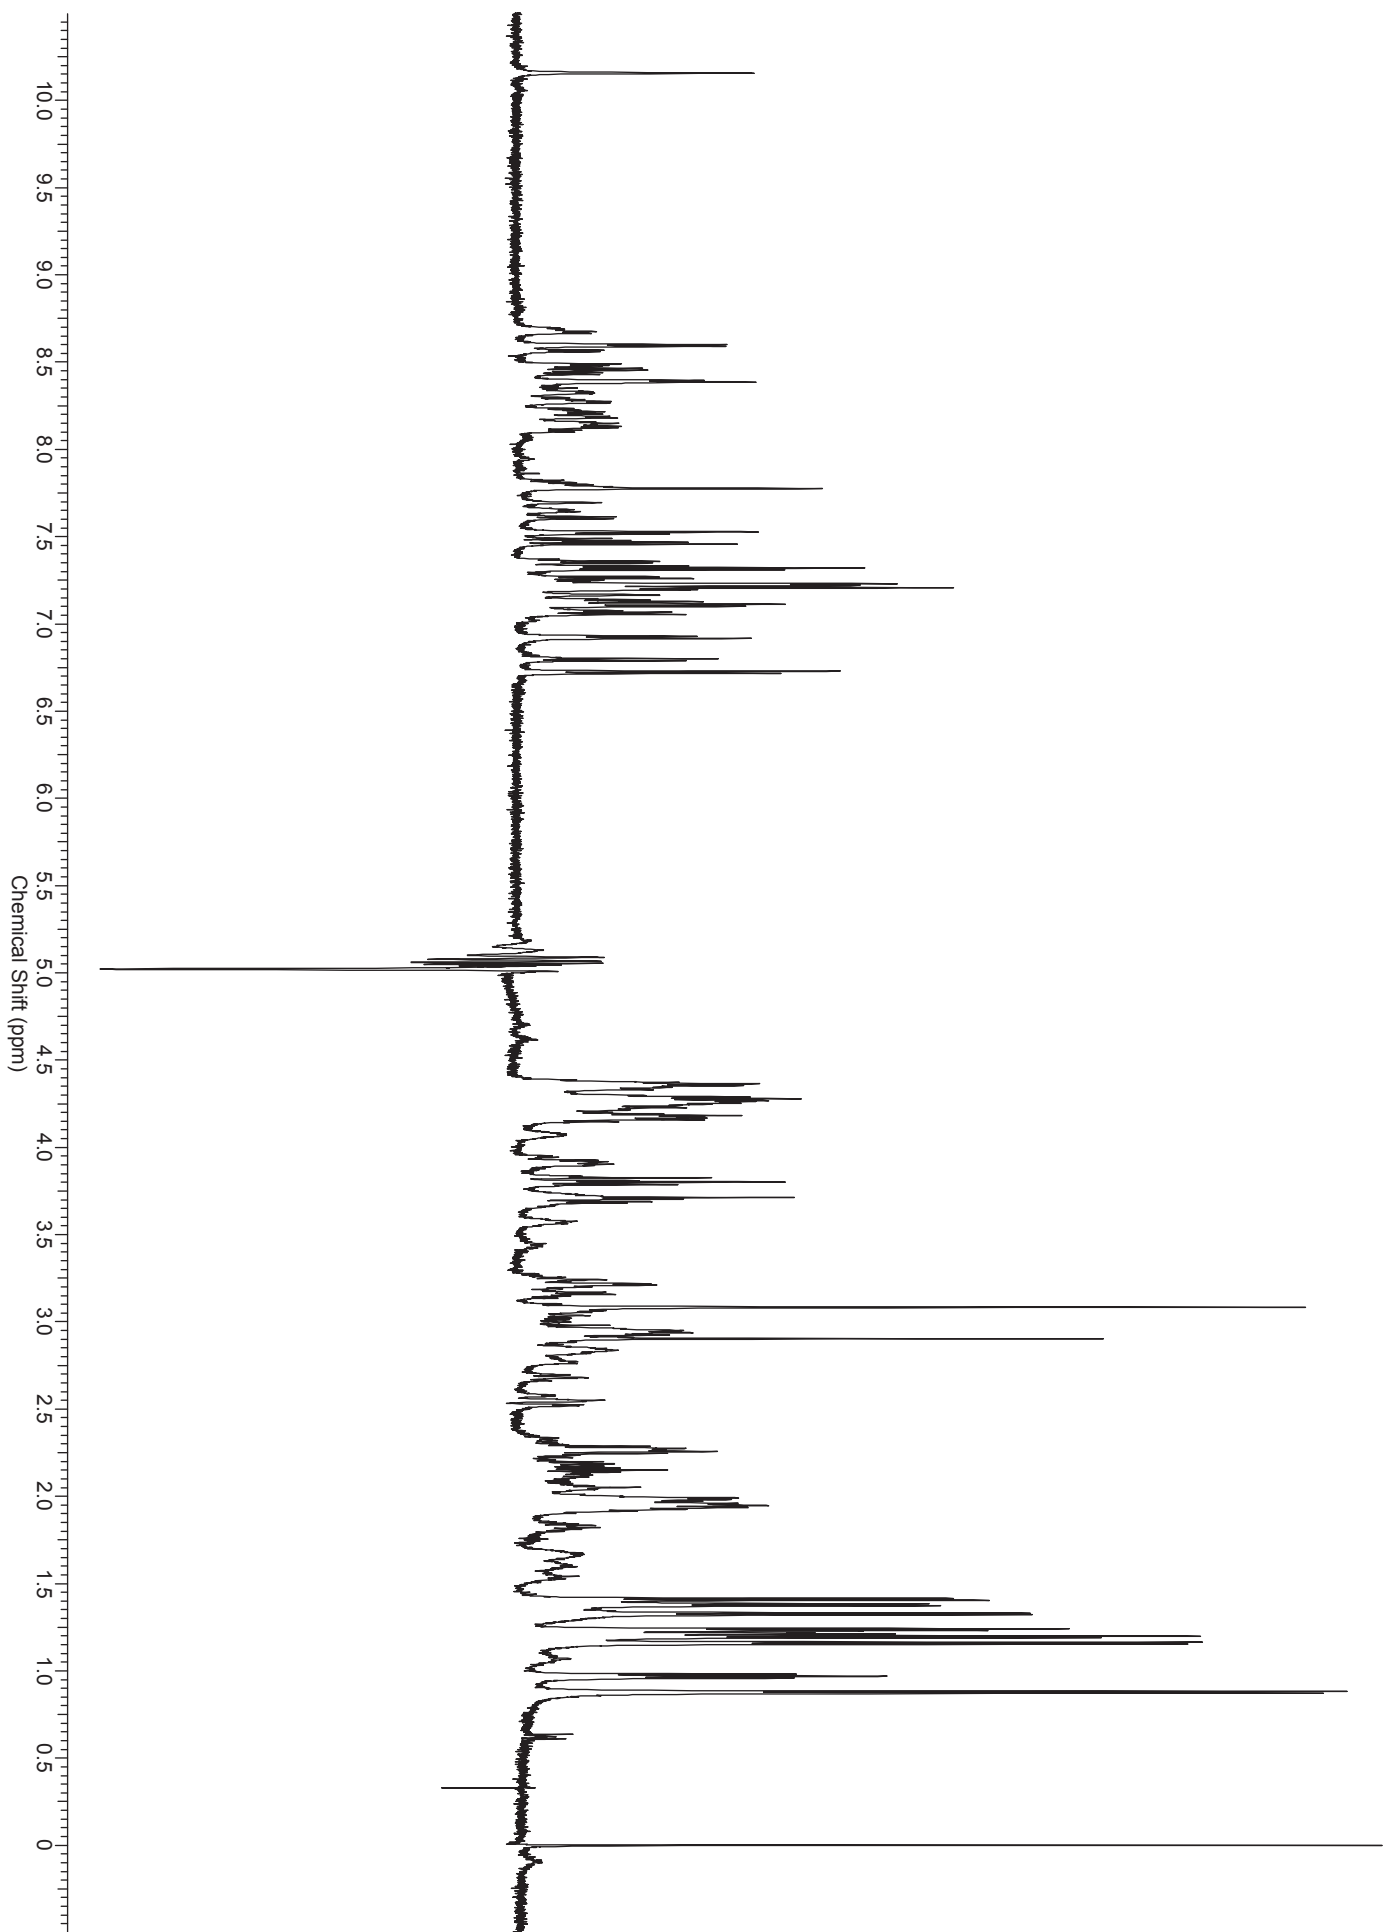

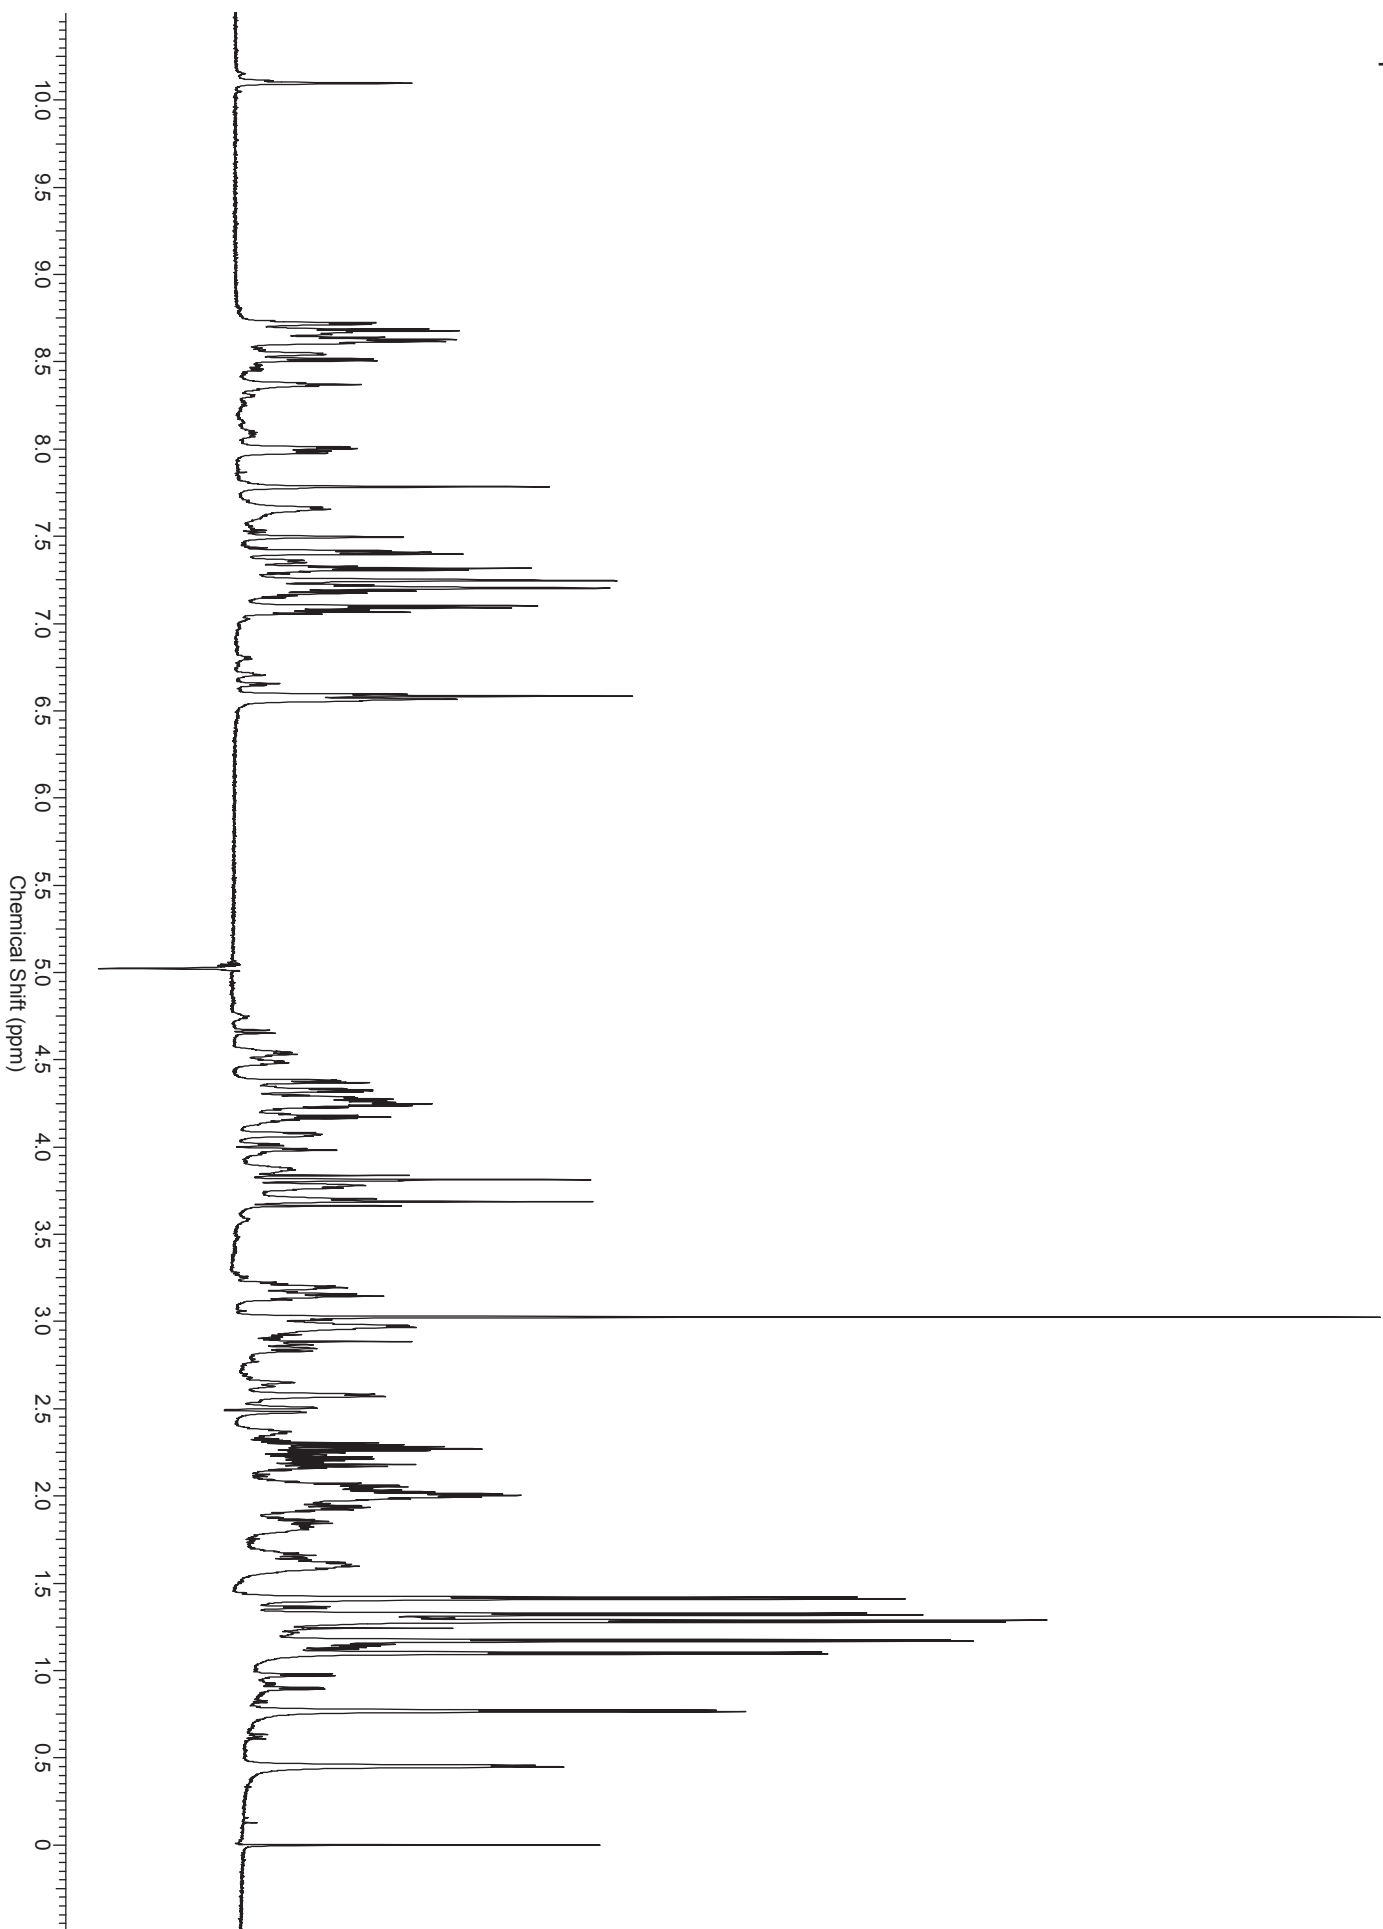

Supplement: NIHMS603468-supplement-Supplementary_Information_2.pdf [file NIHMS603468-supplement-Supplementary_Information_2.pdf]
