# Supplementary material
Source: PubMed Central journal article supplement (PMC4129447)
Supplement: NIHMS603468-supplement-Supplementary_Information_1.pdf [file NIHMS603468-supplement-Supplementary_Information_1.pdf]

# Comparison of Backbone Modification in Protein $\beta$ -Sheets by $\alpha \rightarrow \gamma$ Residue Replacement and $\alpha$ -Residue Methylation

George A. Lengyel, Zachary E. Reinert, Bryan D. Griffith, and W. Seth Horne\*

*Department of Chemistry, University of Pittsburgh, Pittsburgh, PA 15260*

## SUPPORTING INFORMATION

### Contents

|                             |          |
|-----------------------------|----------|
| Supplementary Figures ..... | page S2  |
| Experimental Methods .....  | page S5  |
| Supplementary Tables.....   | page S8  |
| References.....             | page S15 |

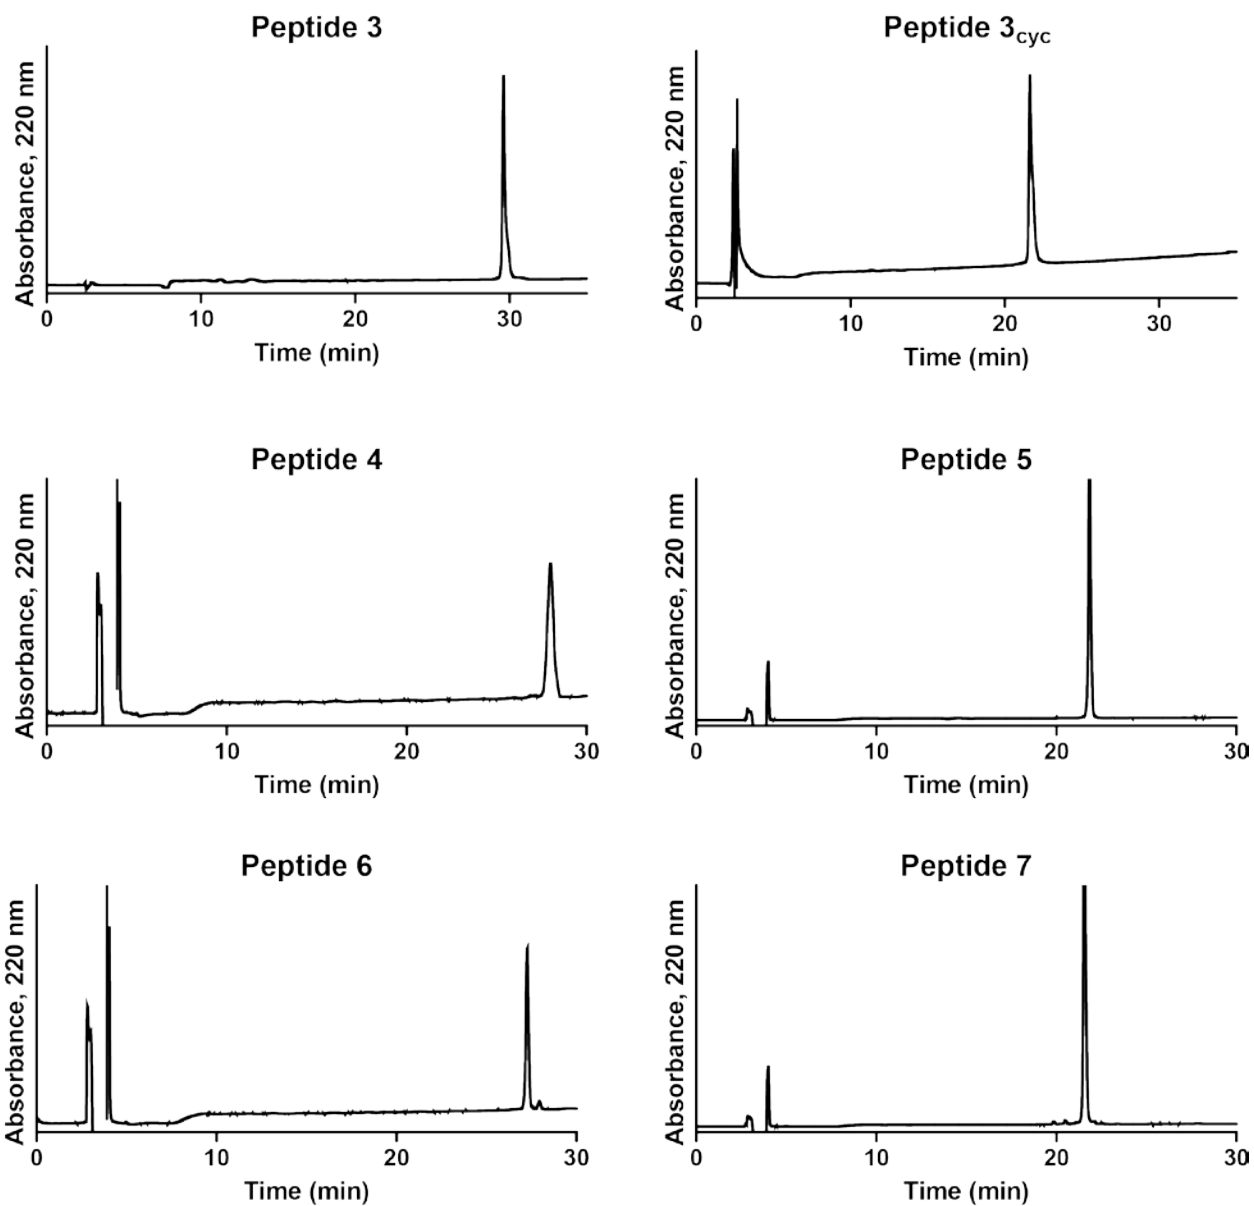

**Figure S1.** Analytical HPLC traces of peptides 3-7.

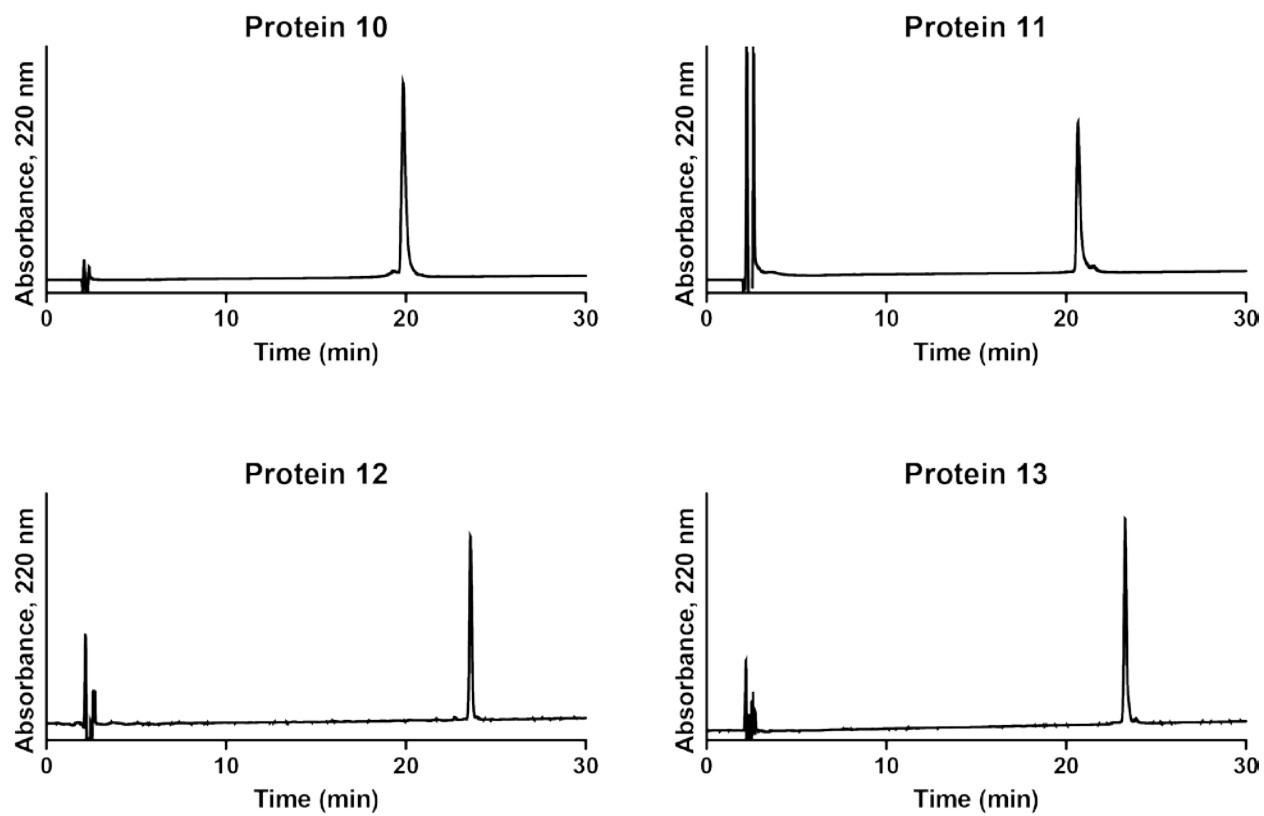

**Figure S2.** Analytical HPLC traces of proteins 10-13.

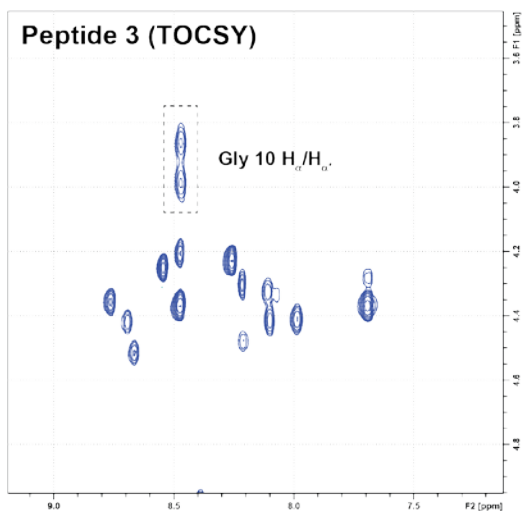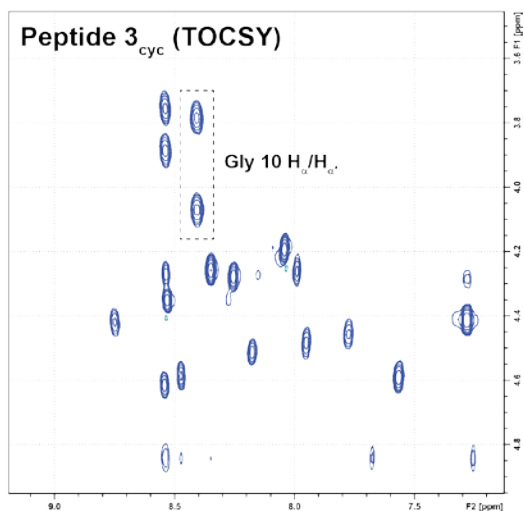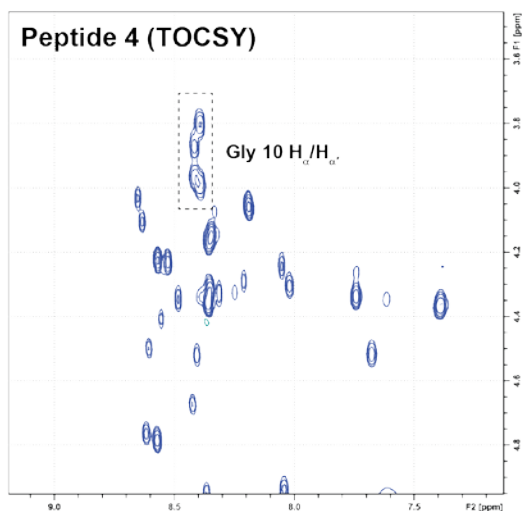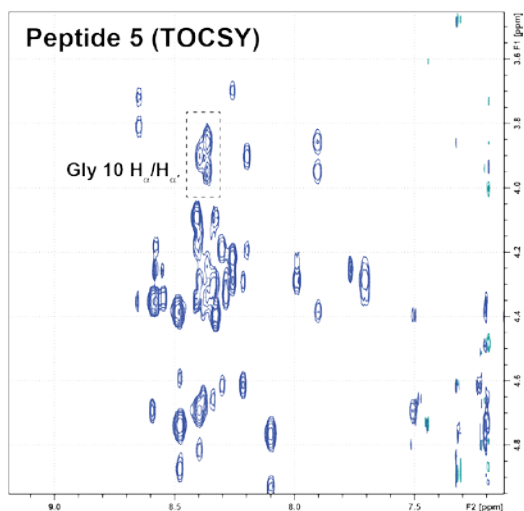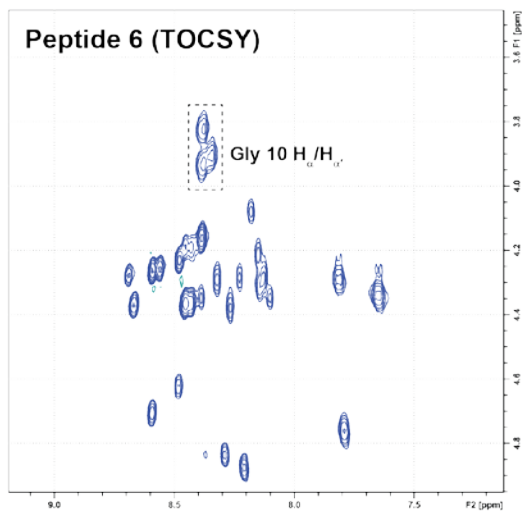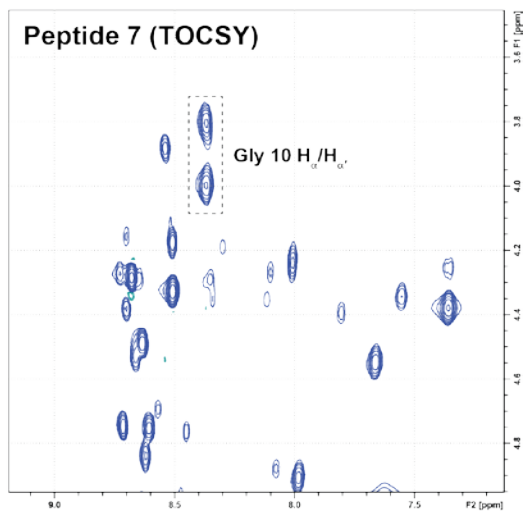

**Figure S3.** N<sub>H</sub>-H<sub>α</sub> regions of the TOCSY spectra of peptides 3-7.

## Experimental Methods

**General Information.** Optical rotations were measured on a Perkin-Elmer 241 digital polarimeter with a sodium lamp at ambient temperature. NMR spectra of synthetic small molecules were recorded on a Bruker Avance-400 spectrometer. 2-(6-chloro-1H-benzotriazole-1-yl)-1,1,3,3-tetramethylammonium hexafluorophosphate (HCTU), NovaPEG Rink Amide Resin, 9-fluorenylmethyl *N*-succinimidyl carbonate (Fmoc-OSu), and Fmoc-protected  $\alpha$ -amino acids were purchased from Novabiochem. Solvents and all other reagents were purchased from Aldrich, Baker, Fisher, or TCI and used as received without further purification. Flash chromatography was performed using SorbTech silica gel (60 Å, 40-63  $\mu$ m). The Weinreb amides of Fmoc-Ala-OH, Fmoc-Ile-OH, Fmoc-Glu(*t*Bu)-OH, and Fmoc-Thr(*t*Bu)-OH were synthesized using a published protocol.<sup>S1</sup>

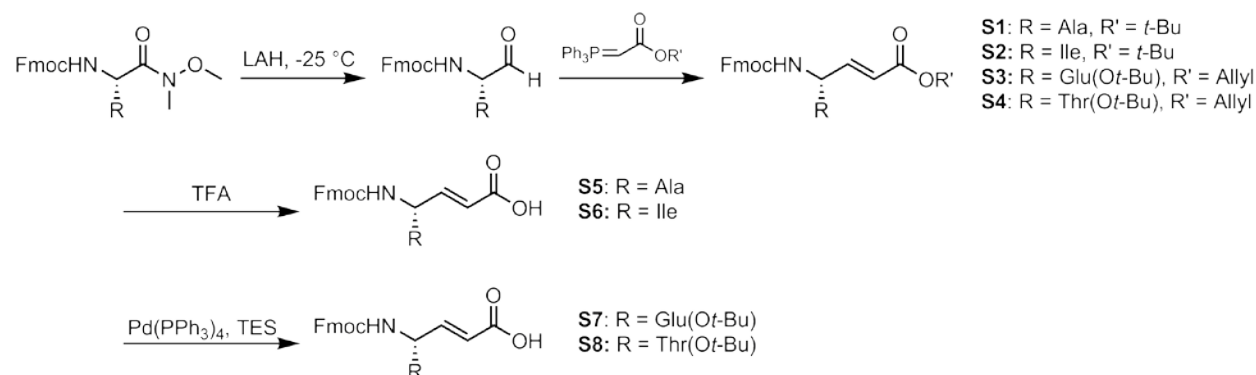

**Standard Procedure A:** To a stirred solution of Fmoc-Weinreb amide (1 equiv) in tetrahydrofuran (0.1 M) at -25 °C was added lithium aluminum hydride (1.1 equiv). The reaction was allowed to stir for 30 minutes and then quenched with 1 M hydrochloric acid, diluted with water, and extracted three times with ethyl acetate. The combined organics were washed with brine, dried with magnesium sulfate, and concentrated to afford the desired Fmoc-aldehyde which was used directly without purification.

**Standard Procedure B:**<sup>S2</sup> To a stirred solution of aldehyde (1 equiv) in tetrahydrofuran (0.2 M) was added the appropriate triphenylphosphorane (1 equiv). The reaction was stirred overnight, concentrated, and purified using column chromatography.

**Standard Procedure C:**<sup>S3</sup> To a stirred solution of aldehyde (1 equiv) in toluene (0.1 M) at 80 °C was added (allyloxycarbonylmethyl)triphenylphosphonium iodide (1.6 equiv) and DIEA (1.4 equiv). The reaction was stirred 3 h. After this time, the reaction was washed with 0.1 M aqueous hydrochloric acid, saturated aqueous sodium bicarbonate solution, and brine. The organics were dried with magnesium sulfate, concentrated, and purified using column chromatography.

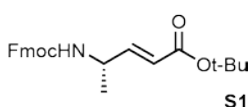

**Fmoc- $\gamma^4$ -Ala-OtBu (S1).** Standard Procedure A was followed using 673 mg Fmoc-Ala Weinreb amide (1.90 mmol), 15 mL tetrahydrofuran, and 79 mg lithium aluminum hydride (2.1 mmol). The resulting aldehyde was subjected to Standard Procedure B using 10 mL tetrahydrofuran and 717 mg (*tert*-butoxycarbonylmethylene) triphenylphosphorane (1.90 mmol). The crude mixture was purified using column chromatography (20% ethyl acetate in hexanes) to afford the product as a white foam (426 mg, 1.08 mmol, 57% yield over 2 steps).  $[\alpha]_D = -13.2$  ( $c = 1.00$ , CHCl<sub>3</sub>). <sup>1</sup>H NMR (400 MHz, CDCl<sub>3</sub>)  $\delta$  7.77 (d,  $J = 7.5$  Hz, 2 H), 7.59 (d,  $J = 7.3$  Hz, 2 H), 7.40 (t,  $J = 7.4$  Hz, 2 H), 7.32 (t,  $J = 7.3$  Hz, 2 H), 6.77 (dd,  $J = 4.6, 15.7$ , 1 H), 5.83 (d,  $J = 15.6$  Hz, 1 H), 4.78 (d,  $J = 6.8$  Hz, 1 H), 4.44 (m, 3 H), 4.22 (t,  $J = 6.7$  Hz, 1 H), 1.50 (s, 9 H), 1.30 (d,  $J = 6.4$  Hz, 3 H); <sup>13</sup>C NMR (100 MHz, CDCl<sub>3</sub>)  $\delta$  165.5, 155.4, 147.4, 143.8,

141.3, 127.7, 127.0, 125.0, 122.3, 120.0, 80.6, 66.7, 47.2, 28.1, 20.3. HRMS  $m/z$  calculated for  $C_{24}H_{28}NO_4$   $[M+H]^+$  394.2018; found 394.2014.

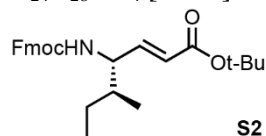

**Fmoc- $\gamma^4$ -Ile-OtBu (S2)** Standard Procedure A was followed using 1.149 g Fmoc-Ile Weinreb amide (2.89 mmol), 23 mL tetrahydrofuran, and 124 mg lithium aluminum hydride (3.27 mmol). The resulting aldehyde was subjected to Standard Procedure B using 15 mL tetrahydrofuran and 1.092 g (*tert*-butoxycarbonylmethylene) triphenylphosphorane (2.90 mmol). The crude

mixture was purified using column chromatography (20% ethyl acetate in hexanes) to afford the product as a white solid (815 mg, 1.87 mmol, 64% yield over 2 steps).  $[\alpha]_D = -3.4$  ( $c = 1.00$ ,  $CHCl_3$ ). This compound exists as a mixture of conformers on the NMR time scale. Existence of two conformers is precedented for similar Fmoc-protected compounds.<sup>S4,5</sup>  $^1H$  NMR, Main Conformer (400 MHz,  $CDCl_3$ )  $\delta$  7.77 (d,  $J = 7.5$  Hz, 2 H), 7.60 (d,  $J = 7.3$  Hz, 2 H), 7.41 (t,  $J = 7.4$  Hz, 2 H), 7.32 ( $J = 7.3$  Hz, 2 H), 6.76 (dd,  $J = 5.5, 15.6$  Hz, 1 H), 5.84 (d,  $J = 15.6$  Hz, 1 H), 4.82 (d,  $J = 9.0$  Hz, 1 H), 4.45 (m, 2 H), 4.30 (m, 1 H), 4.23 (t,  $J = 6.5$  Hz, 1 H), 1.63 (m, 1 H), 1.50 (s, 9 H), 1.46 (m, 1 H), 1.13 (m, 1 H), 0.91 (m, 6 H);  $^{13}C$  NMR (100 MHz,  $CDCl_3$ )  $\delta$  165.1, 155.4, 144.8, 143.5, 141.0, 127.4, 126.7, 124.6, 123.3, 119.6, 80.2, 66.3, 55.9, 47.0, 38.6, 27.8, 24.9, 14.9, 11.2. HRMS  $m/z$  calculated for  $C_{27}H_{34}NO_4$   $[M+H]^+$  436.2488; found 436.2488.

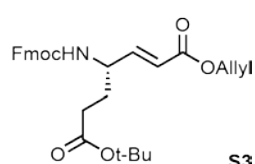

**Fmoc- $\gamma^4$ -Glu(tBu)-OAllyl (S3)**. Standard Procedure A was followed using 1.835 g Fmoc-Glu(tBu) Weinreb amide (3.92 mmol), 30 mL tetrahydrofuran, and 162 mg lithium aluminum hydride (4.27 mmol). Standard Procedure C was followed using 3.06 g phosphonium (6.27 mmol), 960  $\mu$ L DIEA (5.51 mmol), and 39 mL toluene. The crude mixture was purified using column chromatography (20% ethyl acetate in hexanes) to afford the product as a white solid (1.272 g, 2.59 mmol, 66% yield

over 2 steps).  $[\alpha]_D = -6.7$  ( $c = 1.00$ ,  $CHCl_3$ ). This compound exists as a mixture of conformers on the NMR time scale.  $^1H$  NMR, Major Conformer (400 MHz,  $CDCl_3$ )  $\delta$  7.76 (d,  $J = 7.5$  Hz, 2 H), 7.59 (d,  $J = 7.3$  Hz, 2 H), 7.40 (t,  $J = 7.4$  Hz, 2 H), 7.31 (t,  $J = 7.3$  Hz, 2 H), 6.86 (dd,  $J = 5.3, 15.6$  Hz, 1 H), 5.94 (m, 2 H), 5.34 (dd,  $J = 1.4, 17.2$  Hz, 1 H), 5.26 (dd,  $J = 1.1, 10.4$  Hz, 1 H), 5.12 (d,  $J = 8.3$  Hz, 1 H), 4.64 (d,  $J = 5.7$  Hz, 2 H), 4.43 (m, 2 H), 4.36 (m, 1 H), 4.20 (t,  $J = 6.7$  Hz, 1 H), 2.32 (m, 2 H), 1.93 (m, 1 H), 1.83 (m, 1 H), 1.44 (s, 9 H);  $^{13}C$  NMR (100 MHz,  $CDCl_3$ )  $\delta$  172.3, 165.7, 155.7, 147.5, 143.8, 141.3, 132.0, 127.7, 127.1, 125.0, 121.1, 120.0, 118.4, 81.0, 66.7, 65.2, 51.8, 47.2, 31.7, 28.9, 28.0. HRMS  $m/z$  calculated for  $C_{27}H_{34}NO_6$   $[M+H]^+$  492.2386; found 492.2362.

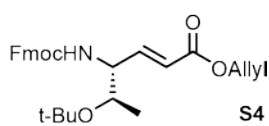

**Fmoc- $\gamma^4$ -Thr(tBu)-OAllyl (S4)**. Standard Procedure A was followed using 2.385 g Fmoc-Glu(tBu) Weinreb amide (5.41 mmol), 43 mL tetrahydrofuran, and 228 mg lithium aluminum hydride (6.00 mmol). Standard Procedure C was followed using 4.22 g phosphonium (8.64 mmol), 1.35 mL DIEA (7.75 mmol), and 54 mL

toluene. The crude mixture was purified using column chromatography (20% ethyl acetate in hexanes) to afford the product as a colorless oil (1.652 g, 3.56 mmol, 66% yield over 2 steps).  $[\alpha]_D = +9.4$  ( $c = 1.00$ ,  $CHCl_3$ ). This compound exists as a mixture of conformers on the NMR time scale.  $^1H$  NMR, Major Conformer (400 MHz,  $CDCl_3$ )  $\delta$  7.78 (d,  $J = 7.4$  Hz, 2 H), 7.62 (d,  $J = 7.2$  Hz, 2 H), 7.41 (t,  $J = 7.3$  Hz, 2 H), 7.33 (t,  $J = 6.8$  Hz, 2 H), 6.98 (dd,  $J = 4.9, 15.7$  Hz, 1 H), 5.96 (m, 2 H), 5.34 (dd,  $J = 1.3, 17.2$  Hz, 1 H), 5.24 (m, 2 H), 4.66 (d,  $J = 5.7$  Hz, 2 H), 4.45 (m, 2 H), 4.26 (m, 2 H), 3.82 (m, 1 H), 1.17 (m, 12 H);  $^{13}C$  NMR (100 MHz,  $CDCl_3$ )  $\delta$  165.7, 156.1, 147.7, 143.8, 141.3, 132.1, 127.7, 127.0, 125.0, 121.1, 119.9, 118.1, 74.11, 68.0, 66.8, 65.0, 57.4, 47.3, 28.5, 20.3. HRMS  $m/z$  calculated for  $C_{28}H_{33}NO_5Na$   $[M+Na]^+$  486.2256; found 486.2242.

**Standard Procedure D:** To a stirred solution of ester in 5 mL dichloromethane was added 5 mL trifluoroacetic acid. The reaction was stirred 4 h, concentrated, solvent-exchanged with chloroform three times, and purified using column chromatography.

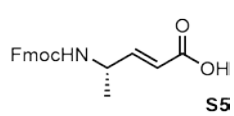

**Fmoc- $\gamma^4$ -Ala-OH (S5).** Standard procedure D was followed using 351 mg **S1** (0.892 mmol). Column chromatography (50% ethyl acetate in hexanes) afforded the product as a white solid (240 mg, 0.711 mmol, 80% yield).  $[\alpha]_D = -13$  ( $c = 0.50$ , DMSO- $d_6$ ). Spectral data matched previously reported results.<sup>S5</sup> HRMS  $m/z$  calculated for

$C_{20}H_{20}NO_4$   $[M+H]^+$  338.1392; found 338.1382.

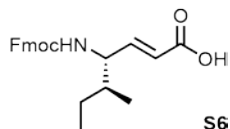

**Fmoc- $\gamma^4$ -Ile-OH (S6).** Standard procedure D was followed using 815 mg **S2** (1.87 mmol). Column chromatography (50% ethyl acetate in hexanes) afforded the product as a white solid (659 mg, 1.74 mmol, 93% yield).  $[\alpha]_D = -7.6$  ( $c = 1.0$ ,  $CHCl_3$ ). This compound exists as a mixture of conformers on the NMR time scale.

$^1H$  NMR, Major Conformer (400 MHz,  $CDCl_3$ )  $\delta$  10.04 (s, 1 H), 7.77 (d,  $J = 7.3$  Hz, 2 H), 7.60 (d,  $J = 7.3$  Hz, 2 H), 7.41 (t,  $J = 7.2$  Hz, 2 H), 7.33 (t,  $J = 6.7$  Hz, 2 H), 6.96 (dd,  $J = 15.6, 5.2$  Hz, 1 H), 5.91 (d,  $J = 15.6$  Hz, 1 H), 4.88 (d,  $J = 9.0$  Hz, 1 H), 4.48 (d,  $J = 6.4$  Hz, 2 H), 4.35 (m, 1 H), 4.22 (t,  $J = 6.3$  Hz, 1 H), 1.28-1.71 (m, 2 H), 1.13 (m, 1 H), 0.91 (m, 6 H);  $^{13}C$  NMR (100 MHz,  $CDCl_3$ )  $\delta$  170.9, 155.9, 149.0, 143.7, 141.3, 127.7, 127.1, 124.9, 121.2, 120.0, 66.6, 56.3, 47.3, 38.8, 25.2, 15.3, 11.5. HRMS  $m/z$  calculated for  $C_{23}H_{26}NO_4$   $[M+H]^+$  380.1862; found 380.1864.

**Standard Procedure E:** To a stirred solution of allyl ester (1 equiv) in dichloromethane (0.1 M) was added tetrakis(triphenylphosphine)palladium (0.1 equiv) and triethylsilane (5 equiv). The reaction was stirred 3 h, then diluted with ethyl acetate and washed once with 1 M HCl and twice with brine. The organics were dried with magnesium sulfate, concentrated, and purified using column chromatography.

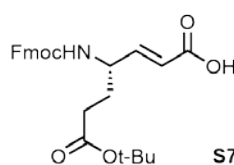

**Fmoc- $\gamma^4$ -Glu(tBu)-OH (S7).** Standard Procedure E was followed using 71 mg **S3** (0.14 mmol), 18 mg tetrakis (0.016 mmol), 115  $\mu$ L triethylsilane (0.72 mmol), and 1.4 mL dichloromethane. Column chromatography (50% ethyl acetate in hexanes) afforded the product as a pale yellow solid (15 mg, 0.033 mmol, 23% yield).  $[\alpha]_D = -9.1$  ( $c = 1.0$ ,  $CHCl_3$ ). This compound exists as a mixture of conformers on the

NMR time scale.  $^1H$  NMR, Major Conformer (400 MHz,  $CDCl_3$ )  $\delta$  7.75 (d,  $J = 7.4$  Hz, 2 H), 7.59 (d,  $J = 7.0$  Hz, 2 H), 7.39 (t,  $J = 7.3$  Hz, 2 H), 7.31 (t,  $J = 7.2$  Hz, 2 H), 6.93 (dd,  $J = 15.7, 5.0$  Hz, 1 H), 5.92 (d,  $J = 15.6$  Hz, 1 H), 5.24 (d,  $J = 8.2$  Hz, 1 H), 4.43 (m, 3 H), 4.20 (t,  $J = 6.3$  Hz, 1 H), 2.31 (m, 2 H), 1.92 (m, 1 H), 1.83 (m, 1 H), 1.44 (s, 9 H),  $^{13}C$  NMR (100 MHz,  $CDCl_3$ )  $\delta$  172.2, 170.5, 155.8, 149.4, 143.7, 141.3, 127.7, 127.0, 124.9, 120.8, 119.9, 81.1, 66.7, 51.8, 47.2, 31.7, 28.9, 28.0. HRMS  $m/z$  calculated for  $C_{26}H_{30}NO_6$   $[M+H]^+$  452.2073; found 452.2070.

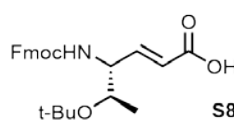

**Fmoc- $\gamma^4$ -Thr(tBu)-OH (S8).** Standard Procedure E was followed using 1.517 g **S4** (3.27 mmol), 378 mg tetrakis (0.327 mmol), 2.6 mL triethylsilane (16 mmol), and 32 mL dichloromethane. Following a silica plug eluting with ethyl acetate, column chromatography (20%  $\rightarrow$  50% ethyl acetate in hexanes) afforded the product as a

pale yellow solid (905 mg, 2.14 mmol, 65% yield).  $[\alpha]_D = +3.8$  ( $c = 1.0$ ,  $CHCl_3$ ). This compound exists as a mixture of conformers on the NMR time scale.  $^1H$  NMR, Major Conformer (400 MHz,  $CDCl_3$ )  $\delta$  7.78 (d,  $J = 7.4$  Hz, 2 H), 7.62 (d,  $J = 7.0$  Hz, 2 H), 7.41 (t,  $J = 7.3$  Hz, 2 H), 7.33 (t,  $J = 7.0$  Hz, 2 H), 7.06 (dd,  $J = 15.7, 4.6$  Hz, 1 H), 5.92 (d,  $J = 15.7$  Hz, 1 H), 5.25 (d,  $J = 9.0$  Hz, 1 H), 4.47 (d,  $J = 6.8$  Hz, 2 H), 4.31 (m, 1 H), 4.25 (t,  $J = 6.7$  Hz, 1 H), 3.83 (m, 1 H), 1.17 (m, 12 H);  $^{13}C$  NMR (100 MHz,  $CDCl_3$ )  $\delta$  171.0, 156.2, 149.9, 143.8, 141.3, 127.7, 127.1, 125.0, 120.8, 120.0, 74.2, 68.0, 66.9, 57.4, 47.3, 28.5, 20.3. HRMS  $m/z$  calculated for  $C_{25}H_{28}NO_5$   $[M+H]^+$  422.1962; found 422.1976.

**Table S1.** MALDI-TOF Data for Peptides **3-7**  
and proteins **10-13**.

| #                      | $[M+H]^+ m/z$ |          |
|------------------------|---------------|----------|
|                        | Calculated    | Observed |
| <b>1</b>               | 1739.8        | 1739.2   |
| <b>2</b>               | 1849.1        | 1849.1   |
| <b>3</b>               | 1791.9        | 1791.4   |
| <b>3<sub>cyc</sub></b> | 2037.9        | 2037.5   |
| <b>4</b>               | 1753.9        | 1753.8   |
| <b>5</b>               | 1753.9        | 1753.8   |
| <b>6</b>               | 1753.9        | 1753.7   |
| <b>7</b>               | 1753.9        | 1752.8   |
| <b>8</b>               | 6179.7        | 6178.6   |
| <b>9</b>               | 6207.7        | 6207.5   |
| <b>10</b>              | 6280.9        | 6281.8   |
| <b>11</b>              | 6232.1        | 6231.3   |
| <b>12</b>              | 6114.1        | 6114.7   |
| <b>13</b>              | 6204.1        | 6203.7   |



**Table S2.** Peptide **3** backbone chemical shifts.

| Residue | Atom                              | $\delta$ (ppm) |
|---------|-----------------------------------|----------------|
| G1      | H <sub><math>\alpha</math>1</sub> | 3.798          |
| G1      | H <sub><math>\alpha</math>2</sub> | 3.857          |
| E2      | H                                 | 8.767          |
| E2      | H <sub><math>\alpha</math></sub>  | 4.363          |
| W3      | H                                 | 8.669          |
| W3      | H <sub><math>\alpha</math></sub>  | 4.521          |
| X4      | H                                 | 8.114          |
| X4      | H <sub><math>\alpha</math></sub>  | 5.3            |
| X4      | H <sub><math>\beta</math></sub>   | 6.137          |
| X4      | H <sub><math>\gamma</math></sub>  | 4.333          |
| Y5      | H                                 | 8.216          |
| Y5      | H <sub><math>\alpha</math></sub>  | 4.487          |
| N6      | H                                 | 8.395          |
| N6      | H <sub><math>\alpha</math></sub>  | 4.99           |
| P7      | H <sub><math>\alpha</math></sub>  | 4.264          |
| A8      | H                                 | 8.221          |
| A8      | H <sub><math>\alpha</math></sub>  | 4.308          |
| T9      | H                                 | 7.697          |
| T9      | H <sub><math>\alpha</math></sub>  | 4.378          |
| G10     | H                                 | 8.474          |
| G10     | H <sub><math>\alpha</math>1</sub> | 3.869          |
| G10     | H <sub><math>\alpha</math>2</sub> | 3.991          |
| K11     | H                                 | 7.993          |
| K11     | H <sub><math>\alpha</math></sub>  | 4.419          |
| F12     | H                                 | 8.698          |
| F12     | H <sub><math>\alpha</math></sub>  | 4.424          |
| X13     | H                                 | 8.104          |
| X13     | H <sub><math>\alpha</math></sub>  | 5.763          |
| X13     | H <sub><math>\beta</math></sub>   | 6.302          |
| X13     | H <sub><math>\gamma</math></sub>  | 4.421          |
| V14     | H                                 | 8.263          |
| V14     | H <sub><math>\alpha</math></sub>  | 4.238          |
| T15     | H                                 | 8.477          |
| T15     | H <sub><math>\alpha</math></sub>  | 4.378          |
| E16     | H                                 | 8.548          |
| E16     | H <sub><math>\alpha</math></sub>  | 4.251          |

**Table S3.** Peptide **3<sub>evc</sub>** backbone chemical shifts.

| Residue             | Atom                              | $\delta$ (ppm) |
|---------------------|-----------------------------------|----------------|
| C1                  | H                                 | 8.478          |
| C1                  | H <sub><math>\alpha</math></sub>  | 4.59           |
| G2                  | H                                 | 8.544          |
| G2                  | H <sub><math>\alpha</math>1</sub> | 3.756          |
| G2                  | H <sub><math>\alpha</math>2</sub> | 3.889          |
| E3                  | H                                 | 8.257          |
| E3                  | H <sub><math>\alpha</math></sub>  | 4.277          |
| W4                  | H                                 | 8.184          |
| W4                  | H <sub><math>\alpha</math></sub>  | 4.514          |
| $\gamma^{\delta}5$  | H                                 | 7.78           |
| $\gamma^{\delta}5$  | H <sub><math>\alpha</math></sub>  | 5.819          |
| $\gamma^{\delta}5$  | H <sub><math>\beta</math></sub>   | 6.404          |
| $\gamma^{\delta}5$  | H <sub><math>\gamma</math></sub>  | 4.46           |
| Y6                  | H                                 | 8.542          |
| Y6                  | H <sub><math>\alpha</math></sub>  | 4.271          |
| N7                  | H                                 | 8.037          |
| N7                  | H <sub><math>\alpha</math></sub>  | 5.009          |
| P8                  | H <sub><math>\alpha</math></sub>  | 4.149          |
| A9                  | H                                 | 7.993          |
| A9                  | H <sub><math>\alpha</math></sub>  | 4.266          |
| T10                 | H                                 | 7.284          |
| T10                 | H <sub><math>\alpha</math></sub>  | 4.416          |
| G11                 | H                                 | 8.41           |
| G11                 | H <sub><math>\alpha</math>1</sub> | 3.784          |
| G11                 | H <sub><math>\alpha</math>2</sub> | 4.073          |
| K12                 | H                                 | 7.568          |
| K12                 | H <sub><math>\alpha</math></sub>  | 4.597          |
| F13                 | H                                 | 8.755          |
| F13                 | H <sub><math>\alpha</math></sub>  | 4.425          |
| $\gamma^{\delta}14$ | H                                 | 7.955          |
| $\gamma^{\delta}14$ | H <sub><math>\alpha</math></sub>  | 5.834          |
| $\gamma^{\delta}14$ | H <sub><math>\beta</math></sub>   | 6.357          |
| $\gamma^{\delta}14$ | H <sub><math>\gamma</math></sub>  | 4.489          |
| V15                 | H                                 | 8.049          |
| V15                 | H <sub><math>\alpha</math></sub>  | 4.192          |
| T16                 | H                                 | 8.356          |
| T16                 | H <sub><math>\alpha</math></sub>  | 4.26           |
| E17                 | H                                 | 8.54           |
| E17                 | H <sub><math>\alpha</math></sub>  | 4.349          |
| C18                 | H                                 | 8.546          |
| C18                 | H <sub><math>\alpha</math></sub>  | 4.62           |

**Table S4.** Peptide 4 backbone chemical shifts.

| Residue | Atom                              | $\delta$ (ppm) |           |
|---------|-----------------------------------|----------------|-----------|
|         |                                   | $4_{trans}$    | $4_{cis}$ |
| G1      | H <sub><math>\alpha</math>1</sub> | 3.599          | *         |
| G1      | H <sub><math>\alpha</math>2</sub> | 3.794          | *         |
| E2      | H                                 | 8.572          | 8.557     |
| E2      | H <sub><math>\alpha</math></sub>  | 4.791          | 4.807     |
| W3      | H <sub><math>\alpha</math></sub>  | 5.330          | 5.230     |
| W3      | H <sub>Me</sub>                   | 3.118          | 2.902     |
| A4      | H                                 | 8.403          | 8.561     |
| A4      | H <sub><math>\alpha</math></sub>  | 4.524          | 4.407     |
| Y5      | H                                 | 8.637          | 8.612     |
| Y5      | H <sub><math>\alpha</math></sub>  | 4.117          | 4.508     |
| N6      | H                                 | 8.061          | 8.375     |
| N6      | H <sub><math>\alpha</math></sub>  | 4.948          | 4.961     |
| P7      | H <sub><math>\alpha</math></sub>  | 4.126          | 4.250     |
| A8      | H                                 | 8.061          | 8.219     |
| A8      | H <sub><math>\alpha</math></sub>  | 4.254          | 4.301     |
| T9      | H                                 | 7.409          | 7.752     |
| T9      | H <sub><math>\alpha</math></sub>  | 4.373          | 4.349     |
| G10     | H                                 | 8.400          | 8.426     |
| G10     | H <sub><math>\alpha</math>1</sub> | 3.813          | 3.887     |
| G10     | H <sub><math>\alpha</math>2</sub> | 4.001          | 3.973     |
| K11     | H                                 | 7.697          | 8.028     |
| K11     | H <sub><math>\alpha</math></sub>  | 4.522          | 4.317     |
| F12     | H                                 | 8.618          | 8.427     |
| F12     | H <sub><math>\alpha</math></sub>  | 4.766          | 4.682     |
| A13     | H                                 | 8.480          | 8.319     |
| A13     | H <sub><math>\alpha</math></sub>  | 4.355          | 4.333     |
| V14     | H                                 | 8.204          | 8.353     |
| V14     | H <sub><math>\alpha</math></sub>  | 4.077          | 4.152     |
| T15     | H                                 | 8.362          | 8.350     |
| T15     | H <sub><math>\alpha</math></sub>  | 4.367          | 4.321     |
| E16     | H                                 | 8.572          | 8.534     |
| E16     | H <sub><math>\alpha</math></sub>  | 4.231          | 4.237     |

\*Indicates an ambiguous or overlapping assignment.

**Table S5.** Peptide 5 backbone chemical shifts.

| Residue | Atom                              | $\delta$ (ppm) |           |
|---------|-----------------------------------|----------------|-----------|
|         |                                   | $5_{trans}$    | $5_{cis}$ |
| G1      | H <sub><math>\alpha</math>1</sub> | 3.724          | 3.707     |
| G1      | H <sub><math>\alpha</math>2</sub> | 3.814          | 3.804     |
| E2      | H                                 | 8.648          | 8.7       |
| E2      | H <sub><math>\alpha</math></sub>  | 4.356          | 4.334     |
| W3      | H                                 | 8.59           | 8.34      |
| W3      | H <sub><math>\alpha</math></sub>  | 4.696          | 4.656     |
| A4      | H                                 | 8.397          | *         |
| A4      | H <sub><math>\alpha</math></sub>  | 4.809          | *         |
| Y5      | H                                 | 4.769          | 4.879     |
| Y5      | H <sub>Me</sub>                   | 2.989          | 2.93      |
| N6      | H                                 | 8.099          | 8.478     |
| N6      | H <sub><math>\alpha</math></sub>  | 4.923          | 4.594     |
| P7      | H <sub><math>\alpha</math></sub>  | 4.222          | 4.343     |
| A8      | H                                 | 8.258          | 8.287     |
| A8      | H <sub><math>\alpha</math></sub>  | 4.289          | 4.288     |
| T9      | H                                 | 7.707          | 7.992     |
| T9      | H <sub><math>\alpha</math></sub>  | 4.345          | 4.293     |
| G10     | H                                 | 8.366          | 8.394     |
| G10     | H <sub><math>\alpha</math>1</sub> | 3.864          | 3.909     |
| G10     | H <sub><math>\alpha</math>2</sub> | 3.956          | ---       |
| K11     | H                                 | 7.905          | 8.197     |
| K11     | H <sub><math>\alpha</math></sub>  | 4.388          | 4.194     |
| F12     | H                                 | 8.487          | 8.3       |
| F12     | H <sub><math>\alpha</math></sub>  | 4.738          | 4.614     |
| A13     | H                                 | 8.476          | 8.218     |
| A13     | H <sub><math>\alpha</math></sub>  | 4.403          | 4.291     |
| V14     | H                                 | 8.329          | 8.335     |
| V14     | H <sub><math>\alpha</math></sub>  | 4.099          | 4.145     |
| T15     | H                                 | 8.404          | *         |
| T15     | H <sub><math>\alpha</math></sub>  | 4.356          | *         |
| E16     | H                                 | 8.576          | 8.546     |
| E16     | H <sub><math>\alpha</math></sub>  | 4.258          | 4.26      |

\*Indicates an ambiguous or overlapping assignment.

**Table S6.** Peptide 6 backbone chemical shifts.

|     | Atom                              | $\delta$ (ppm)   |                |
|-----|-----------------------------------|------------------|----------------|
|     |                                   | $\delta_{trans}$ | $\delta_{cis}$ |
| G1  | H <sub><math>\alpha</math>1</sub> | 3.708            | 3.703          |
| G1  | H <sub><math>\alpha</math>2</sub> | 3.817            | 3.806          |
| E2  | H                                 | 8.666            | 8.69           |
| E2  | H <sub><math>\alpha</math></sub>  | 4.371            | 4.275          |
| W3  | H                                 | 8.594            | 8.482          |
| W3  | H <sub><math>\alpha</math></sub>  | 4.709            | 4.625          |
| A4  | H                                 | 8.331            | 8.153          |
| A4  | H <sub><math>\alpha</math></sub>  | 4.292            | 4.212          |
| Y5  | H                                 | 8.182            | 8.099          |
| Y5  | H <sub><math>\alpha</math></sub>  | 4.072            | 4.346          |
| N6  | H                                 | 8.204            | 8.286          |
| N6  | H <sub><math>\alpha</math></sub>  | 4.878            | 4.831          |
| P7  | H <sub><math>\alpha</math></sub>  | 4.167            | 4.239          |
| A8  | H                                 | 8.125            | 8.227          |
| A8  | H <sub><math>\alpha</math></sub>  | 4.271            | 4.278          |
| T9  | H                                 | 7.645            | 7.815          |
| T9  | H <sub><math>\alpha</math></sub>  | 4.339            | 4.288          |
| G10 | H                                 | 8.387            | 8.352          |
| G10 | H <sub><math>\alpha</math>1</sub> | 3.823            | 3.905          |
| G10 | H <sub><math>\alpha</math>2</sub> | 3.94             | ---            |
| K11 | H                                 | 7.786            | 8.138          |
| K11 | H <sub><math>\alpha</math></sub>  | 4.765            | 4.307          |
| F12 | H <sub><math>\alpha</math></sub>  | 5.204            | 5.05           |
| F12 | H <sub>Me</sub>                   | 3.083            | 2.902          |
| A13 | H                                 | 8.27             | 8.386          |
| A13 | H <sub><math>\alpha</math></sub>  | 4.382            | 4.345          |
| V14 | H                                 | 8.386            | 8.474          |
| V14 | H <sub><math>\alpha</math></sub>  | 4.162            | 4.23           |
| T15 | H                                 | 8.453            | 8.431          |
| T15 | H <sub><math>\alpha</math></sub>  | 4.36             | 4.366          |
| E16 | H                                 | 8.589            | 8.557          |
| E16 | H <sub><math>\alpha</math></sub>  | 4.261            | 4.257          |

**Table S7.** Peptide 7 backbone chemical shifts.

| Residue | Atom                              | $\delta$ (ppm)   |                |
|---------|-----------------------------------|------------------|----------------|
|         |                                   | $\delta_{trans}$ | $\delta_{cis}$ |
| G1      | H <sub><math>\alpha</math>1</sub> | 3.683            | *              |
| G1      | H <sub><math>\alpha</math>2</sub> | 3.831            | *              |
| E2      | H                                 | 8.637            | 8.729          |
| E2      | H <sub><math>\alpha</math></sub>  | 4.492            | 4.282          |
| W3      | H                                 | 8.717            | 8.453          |
| W3      | H <sub><math>\alpha</math></sub>  | 4.754            | 4.771          |
| A4      | H                                 | 8.662            | 8.342          |
| A4      | H <sub><math>\alpha</math></sub>  | 4.541            | 4.354          |
| Y5      | H                                 | 8.543            | 8.302          |
| Y5      | H <sub><math>\alpha</math></sub>  | 3.888            | 4.196          |
| N6      | H                                 | 7.986            | 8.08           |
| N6      | H <sub><math>\alpha</math></sub>  | 4.912            | 4.885          |
| P7      | H <sub><math>\alpha</math></sub>  | 4.082            | 4.149          |
| A8      | H                                 | 8.01             | 8.101          |
| A8      | H <sub><math>\alpha</math></sub>  | 4.244            | 4.275          |
| T9      | H                                 | 7.364            | 7.556          |
| T9      | H <sub><math>\alpha</math></sub>  | 4.383            | 4.35           |
| G10     | H                                 | 8.37             | 8.357          |
| G10     | H <sub><math>\alpha</math>1</sub> | 3.811            | 3.857          |
| G10     | H <sub><math>\alpha</math>2</sub> | 4.006            | 3.974          |
| K11     | H                                 | 7.663            | 7.808          |
| K11     | H <sub><math>\alpha</math></sub>  | 4.55             | 4.402          |
| F12     | H                                 | 8.61             | 8.573          |
| F12     | H <sub><math>\alpha</math></sub>  | 4.757            | 4.699          |
| A13     | H                                 | 8.625            | 8.477          |
| A13     | H <sub><math>\alpha</math></sub>  | 4.844            | 4.97           |
| V14     | H <sub><math>\alpha</math></sub>  | 4.668            | 4.675          |
| V14     | H <sub>Me</sub>                   | 3.029            | 2.891          |
| T15     | H                                 | 8.513            | *              |
| T15     | H <sub><math>\alpha</math></sub>  | 4.334            | *              |
| E16     | H                                 | 8.682            | *              |
| E16     | H <sub><math>\alpha</math></sub>  | 4.287            | *              |

\*Indicates an ambiguous or overlapping assignment.

**Table S8.** NOE-Derived Distance Restraints for Peptide 3<sub>evc</sub>.

| Residue | Proton     | Residue | Proton | Distance   |     |      |
|---------|------------|---------|--------|------------|-----|------|
| 1       | C          | HA      | 2      | G          | H   | 2.70 |
| 3       | E          | HA      | 4      | W          | H   | 2.70 |
| 3       | E          | HB1     | 3      | E          | H   | 2.70 |
| 4       | W          | H       | 3      | E          | HA  | 2.70 |
| 5       | $\gamma^4$ | HA      | 6      | Y          | H   | 2.70 |
| 6       | Y          | H       | 5      | $\gamma^4$ | HA  | 2.70 |
| 6       | Y          | HA      | 7      | N          | H   | 2.70 |
| 7       | N          | H       | 6      | Y          | HA  | 2.70 |
| 7       | N          | HA      | 8      | P          | QD  | 2.70 |
| 10      | T          | H       | 11     | G          | H   | 2.70 |
| 11      | G          | H       | 10     | T          | H   | 2.70 |
| 14      | $\gamma^4$ | HA      | 15     | V          | H   | 2.70 |
| 15      | V          | H       | 14     | $\gamma^4$ | HA  | 2.70 |
| 15      | V          | HA      | 15     | T          | H   | 2.70 |
| 16      | T          | H       | 15     | V          | HA  | 2.70 |
| 16      | T          | HA      | 17     | E          | H   | 2.70 |
| 17      | E          | H       | 16     | T          | HA  | 2.70 |
| 2       | G          | H       | 3      | E          | H   | 3.50 |
| 2       | G          | HA1     | 3      | E          | H   | 3.50 |
| 2       | G          | HA2     | 3      | E          | H   | 3.50 |
| 3       | E          | H       | 2      | G          | H   | 3.50 |
| 3       | E          | H       | 2      | G          | HA1 | 3.50 |
| 3       | E          | H       | 2      | G          | HA2 | 3.50 |
| 3       | E          | HB2     | 4      | W          | H   | 3.50 |
| 4       | W          | H       | 5      | $\gamma^4$ | H   | 3.50 |
| 4       | W          | HA      | 5      | $\gamma^4$ | H   | 3.50 |
| 4       | W          | HA      | 15     | V          | HA  | 3.50 |
| 5       | $\gamma^4$ | H       | 4      | W          | H   | 3.50 |
| 5       | $\gamma^4$ | H       | 4      | W          | HA  | 3.50 |
| 5       | $\gamma^4$ | HA      | 13     | F          | QD  | 3.50 |
| 5       | $\gamma^4$ | HB      | 14     | $\gamma^4$ | H   | 3.50 |
| 6       | Y          | HA      | 13     | F          | QD  | 3.50 |
| 6       | Y          | HA      | 14     | $\gamma^4$ | H   | 3.50 |
| 6       | Y          | HB2     | 7      | N          | H   | 3.50 |
| 6       | Y          | QE      | 7      | P          | HA  | 3.50 |
| 7       | P          | HA      | 6      | Y          | QE  | 3.50 |
| 7       | P          | HA      | 9      | A          | H   | 3.50 |
| 7       | P          | QB      | 6      | Y          | QE  | 3.50 |
| 7       | P          | QD      | 9      | A          | H   | 3.50 |
| 7       | P          | QG      | 9      | A          | H   | 3.50 |
| 9       | A          | H       | 8      | P          | HA  | 3.50 |
| 9       | A          | H       | 8      | P          | QD  | 3.50 |
| 9       | A          | H       | 10     | T          | H   | 3.50 |
| 9       | A          | HA      | 9      | A          | H   | 3.50 |
| 9       | A          | HA      | 10     | T          | H   | 3.50 |
| 10      | T          | H       | 9      | A          | H   | 3.50 |
| 10      | T          | H       | 9      | A          | HA  | 3.50 |
| 10      | T          | H       | 9      | A          | QXB | 3.50 |
| 10      | T          | HA      | 6      | Y          | QD  | 3.50 |
| 10      | T          | QXGT    | 10     | T          | HA  | 3.50 |
| 10      | T          | QXGT    | 10     | T          | HB  | 3.50 |
| 11      | G          | H       | 12     | K          | H   | 3.50 |
| 11      | G          | HA1     | 12     | K          | H   | 3.50 |
| 11      | G          | HA2     | 12     | K          | H   | 3.50 |
| 12      | K          | H       | 11     | G          | H   | 3.50 |
| 12      | K          | QB      | 13     | F          | H   | 3.50 |
| 13      | F          | H       | 12     | K          | QB  | 3.50 |

| Residue |            | Proton | Residue |            | Proton | Distance |
|---------|------------|--------|---------|------------|--------|----------|
| 13      | F          | HA     | 7       | N          | H      | 3.50     |
| 13      | F          | HA     | 14      | $\gamma^4$ | H      | 3.50     |
| 14      | $\gamma^4$ | H      | 5       | $\gamma^4$ | HB     | 3.50     |
| 14      | $\gamma^4$ | H      | 13      | F          | HA     | 3.50     |
| 14      | $\gamma^4$ | H      | 13      | F          | QB     | 3.50     |
| 15      | V          | H      | 14      | $\gamma^4$ | HB     | 3.50     |
| 15      | V          | HB     | 16      | T          | H      | 3.50     |
| 16      | T          | H      | 15      | V          | H      | 3.50     |
| 16      | T          | H      | 15      | V          | QXG2   | 3.50     |
| 16      | T          | H      | 17      | E          | H      | 3.50     |
| 17      | E          | H      | 16      | T          | H      | 3.50     |
| 17      | E          | H      | 17      | E          | HA     | 3.50     |
| 18      | C          | H      | 17      | E          | HA     | 3.50     |
| 3       | E          | HB1    | 4       | W          | H      | 4.50     |
| 4       | W          | HH2    | 16      | T          | QXGT   | 4.50     |
| 4       | W          | HZ3    | 5       | $\gamma^4$ | H      | 4.50     |
| 4       | W          | QB     | 5       | $\gamma^4$ | H      | 4.50     |
| 5       | $\gamma^4$ | H      | 15      | V          | HA     | 4.50     |
| 5       | $\gamma^4$ | HA     | 13      | F          | QE     | 4.50     |
| 6       | Y          | HB1    | 7       | N          | H      | 4.50     |
| 6       | Y          | HB2    | 13      | F          | QD     | 4.50     |
| 6       | Y          | HB2    | 13      | F          | QE     | 4.50     |
| 6       | Y          | QD     | 7       | N          | H      | 4.50     |
| 6       | Y          | QD     | 8       | P          | QD     | 4.50     |
| 6       | Y          | QD     | 13      | F          | QD     | 4.50     |
| 7       | N          | H      | 6       | Y          | H      | 4.50     |
| 7       | N          | H      | 6       | Y          | QD     | 4.50     |
| 7       | N          | H      | 6       | Y          | QE     | 4.50     |
| 7       | N          | H      | 12      | K          | H      | 4.50     |
| 7       | N          | HA     | 9       | A          | H      | 4.50     |
| 8       | P          | HA     | 6       | Y          | QD     | 4.50     |
| 8       | P          | QB     | 6       | Y          | QD     | 4.50     |
| 8       | P          | QG     | 6       | Y          | QE     | 4.50     |
| 9       | A          | H      | 11      | G          | H      | 4.50     |
| 9       | A          | QXB    | 10      | T          | H      | 4.50     |
| 10      | T          | H      | 12      | K          | H      | 4.50     |
| 10      | T          | HA     | 11      | G          | H      | 4.50     |
| 10      | T          | HB     | 12      | K          | H      | 4.50     |
| 10      | T          | QXGT   | 9       | A          | HA     | 4.50     |
| 11      | G          | H      | 10      | T          | HA     | 4.50     |
| 11      | G          | HA1    | 6       | Y          | QD     | 4.50     |
| 11      | G          | HA1    | 6       | Y          | QE     | 4.50     |
| 12      | K          | H      | 7       | N          | H      | 4.50     |
| 12      | K          | H      | 10      | T          | H      | 4.50     |
| 12      | K          | HA     | 6       | Y          | QD     | 4.50     |
| 12      | K          | HA     | 6       | Y          | QE     | 4.50     |
| 12      | K          | HA     | 13      | F          | H      | 4.50     |
| 13      | F          | H      | 12      | K          | HA     | 4.50     |
| 13      | F          | H      | 12      | K          | QD     | 4.50     |
| 13      | F          | QD     | 6       | Y          | QD     | 4.50     |
| 13      | F          | QD     | 14      | $\gamma^4$ | H      | 4.50     |
| 14      | $\gamma^4$ | QXD    | 5       | $\gamma^4$ | HB     | 4.50     |
| 15      | V          | H      | 14      | $\gamma^4$ | QXD    | 4.50     |
| 15      | V          | HA     | 5       | $\gamma^4$ | H      | 4.50     |
| 15      | V          | QXG1   | 4       | W          | HZ3    | 4.50     |
| 15      | V          | QXG2   | 2       | G          | HA1    | 4.50     |
| 15      | V          | QXG2   | 2       | G          | HA2    | 4.50     |
| 15      | V          | QXG2   | 16      | T          | H      | 4.50     |

| Residue |            | Proton | Residue |            | Proton | Distance |
|---------|------------|--------|---------|------------|--------|----------|
| 16      | T          | H      | 3       | E          | H      | 4.50     |
| 16      | T          | H      | 15      | V          | QXG1   | 4.50     |
| 16      | T          | QXGT   | 15      | V          | H      | 4.50     |
| 16      | T          | QXGT   | 17      | E          | H      | 4.50     |
| 5       | $\gamma^4$ | QXD    | 6       | Y          | H      | 5.50     |
| 8       | P          | QD     | 6       | Y          | QD     | 5.50     |
| 14      | $\gamma^4$ | HB     | 5       | $\gamma^4$ | H      | 5.50     |
| 15      | V          | QXG1   | 16      | T          | H      | 5.50     |

## References

- 1 G. Wang, U. Mahesh, G. Y. J. Chen and S. Q. Yao, *Org. Lett.*, 2003, **5**, 737-740.
- 2 S. M. Mali, A. Bandyopadhyay, S. V. Jadhav, M. G. Kumar and H. N. Gopi, *Org. Biomol. Chem.*, 2011, **9**, 6566-6574.
- 3 F. Debaene, L. Mejias, J. L. Harris and N. Winssinger, *Tetrahedron*, 2004, **60**, 8677-8690.
- 4 A. Bandyopadhyay, S. M. Mali, P. Lunawat, K. M. P. Raja and H. N. Gopi, *Org. Lett.*, 2011, **13**, 4482-4485.
- 5 S. S. Shankar, S. N. Benke, N. Nagendra, P. L. Srivastava, H. V. Thulasiram and H. N. Gopi, *J. Med. Chem.*, 2013, **56**, 8468-8474.
